# Supplementary material for: Genetically Encoded, Noise-Tolerant, Auxin Biosensors in Yeast
Source: PubMed Central journal article supplement (PMC11421217; doi:10.1021/acssynbio.4c00186), 2024-08-28
Supplement: sb4c00186_si_001.pdf [file sb4c00186_si_001.pdf]

## Supporting Information

### Genetically encoded, noise-tolerant, auxin biosensors in yeast

**Authors:** Patarasuda Chaisupa<sup>1</sup>, Md Mahbubur Rahman<sup>1</sup>, Sherry B. Hildreth<sup>2</sup>, Saede Moseley<sup>1</sup>, Chauncey Gatling<sup>1</sup>, Matthew R. Bryant<sup>1</sup>, Richard F. Helm<sup>2,3</sup>, R. Clay Wright<sup>1,2,4\*</sup>

#### Affiliations:

<sup>1</sup> Department of Biological Systems Engineering, Virginia Tech, Blacksburg, VA 24061, United States,

<sup>2</sup> Fralin Life Sciences Institute, Virginia Tech, Blacksburg, VA 24061, United States,

<sup>3</sup> Department of Biochemistry, Virginia Tech, Blacksburg, VA 24061, United States,

<sup>4</sup> The Translational Plant Sciences Center (TPSC), Virginia Tech, Blacksburg, VA 24061, United States

\* To whom correspondence should be addressed: [wrightrc@vt.edu](mailto:wrightrc@vt.edu)

### SUPPORTING FIGURES

Supporting Figure S1. Western blot analyses using two antibodies

Supporting Figure S2. Ratiometric dual-fusion auxin biosensors reduce cell-to-cell variation in yeast strains

Supporting Figure S3. Auxin-induced Venus-Aux/IAA17 degradation response comparison in yeast strains.

Supporting Figure S4. Comparison of steady-state fluorescent expression levels of single- and dual-fusion biosensors in W303 yeast.

Supporting Figure S5. Comparison of steady-state biosensors responses in different yeast strains.

Supporting Figure S6. Testing the reversibility of the dual-fusion AFB2 biosensor.

Supporting Figure S7. Dose and time response of the AFB2 dual-fusion biosensor.

Supporting Figure S8. Defining conditions for AFB2 dual-fusion biosensor dose-response assay.

Supporting Figure S9. Cell growth conditions during auxin biosynthesis assays.

### SUPPORTING TABLES

Supporting Table S1. List of primers

Supporting Table S2. List of plasmids and *E.coli*

Supporting Table S3. List of *S. cerevisiae* strains

### SUPPORTING TEXT

Supporting Text S1. Supplemental reproducible analysis for: Genetically encoded, noise-tolerant, auxin biosensors in yeast.

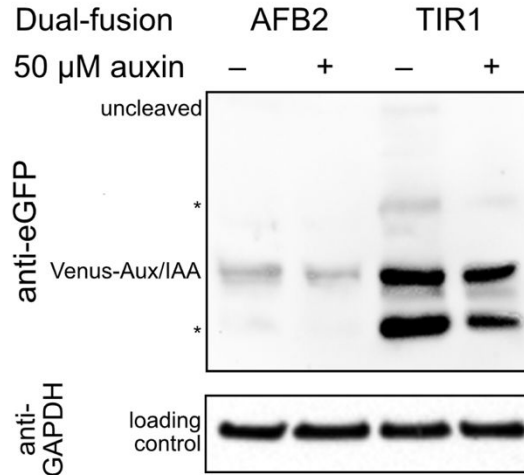

**Supporting Figure S1. Western blot analyses using two antibodies.** Cultures of yeast expressing the dual-fusion AFB2 and TIR1 biosensor were treated with either 50  $\mu$ M auxin or a control solvent for 3 hours at exponential growth phase. Cells were harvested from these cultures and lysed. Protein samples of 500  $\mu$ g were used for western blotting with anti-eGFP antibodies (which bind to Venus as well) and GAPDH (loading control). The expected band size for Venus-Aux/IAA17 is  $\sim$ 52 kDa, while for TIR1- or AFB2-mScarlet, it is  $\sim$ 91 kDa (which should not stain with the anti-eGFP antibody used as mScarlet is derived from dsRed). The uncleaved product would then be  $\sim$ 143 kDa. Some non-specific bands or degradation products (indicated with \*) were also seen, particularly in the TIR1 samples. We did not observe these bands when loading lower amounts of total protein, but also did not observe any uncleaved product.

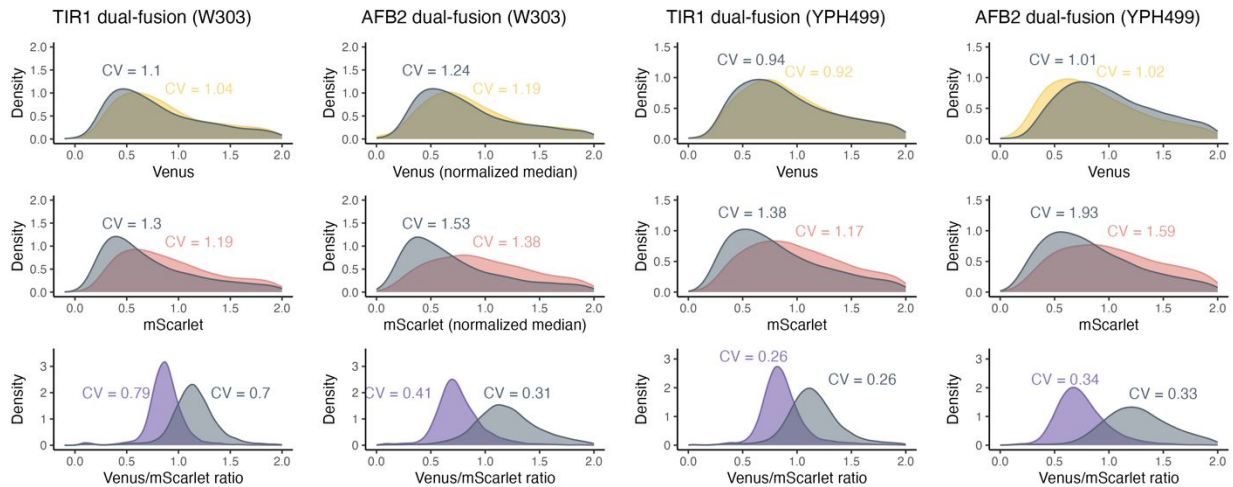

**Supporting Figure S2. Ratiometric dual-fusion auxin biosensors reduce cell-to-cell variation in two distinct yeast strains.** Distributions of Venus-Aux/IAA17 (top), TIR1- or AFB2-mScarlet (middle), and the ratio of Venus/mScarlet (bottom) fluorescence in samples of  $10^4$  cells 4 hours after treatment with 50  $\mu$ M auxin (colored) or vehicle control (gray). All data were normalized to the median of the combined treated and control distributions on each plot to center the distributions. Distributions are shown as kernel density estimates. The coefficients of variation (CV) of the Venus/mScarlet ratio are reduced about three-fold relative to the single Venus-Aux/IAA17 fluorescence measurements.

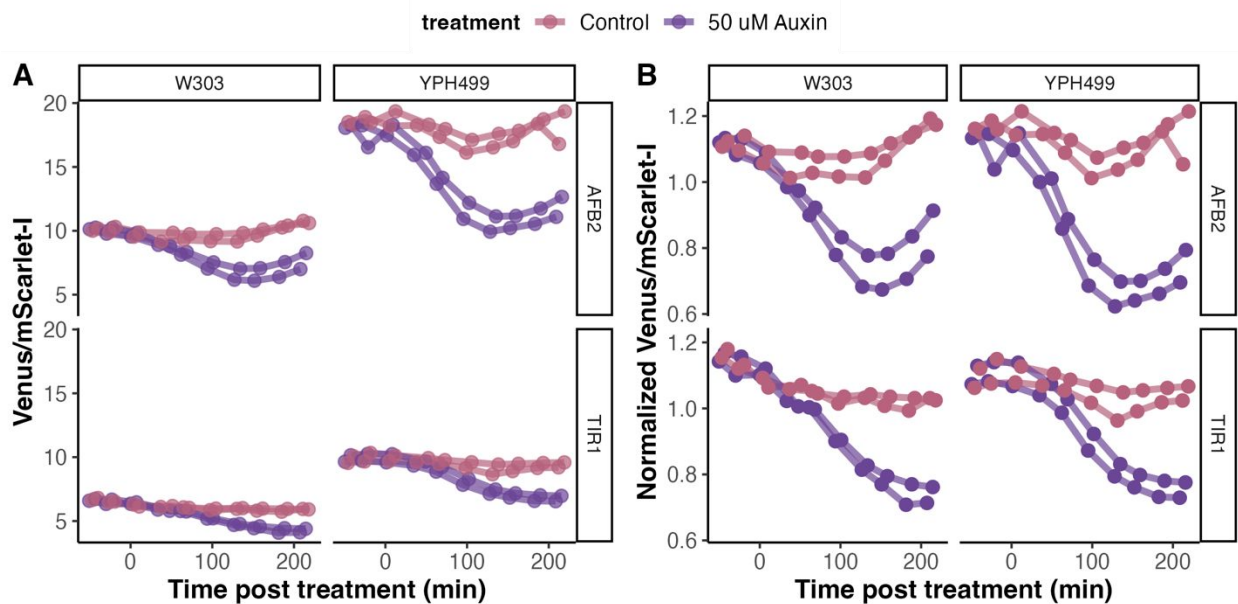

**Supporting Figure S3. Auxin-induced Venus-Aux/IAA17 degradation response comparison in two distinct yeast strains.** YPH499 and W303 yeast with genomically integrated TIR1 or AFB2 dual-fusion biosensor constructs were cultured throughout exponential growth phase and treated with 50  $\mu$ M auxin or vehicle control treatments at time zero. Venus-Aux/IAA17 and TIR1- or AFB2-mScarlet-I fluorescence was measured every 30 minutes by flow cytometry. **(A)** Raw ratios of Venus/mScarlet-I fluorescence show that AFB2 induces a more rapid decrease in the Venus/mScarlet-I ratio than TIR1, as expected based on the more rapid degradation of Aux/IAA17 in the presence of AFB2. Interestingly, basal fluorescence ratio levels of both biosensors were lower in W303 than YPH499. **(B)** To facilitate relative comparison of dynamics the fluorescence ratio values were normalized to the overall mean fluorescence ratio on each subplot. Although the dual-fusion biosensors in the two genetically distinct yeast strains had different levels of basal fluorescence, they showed similar behaviors in response to exogenous auxin.

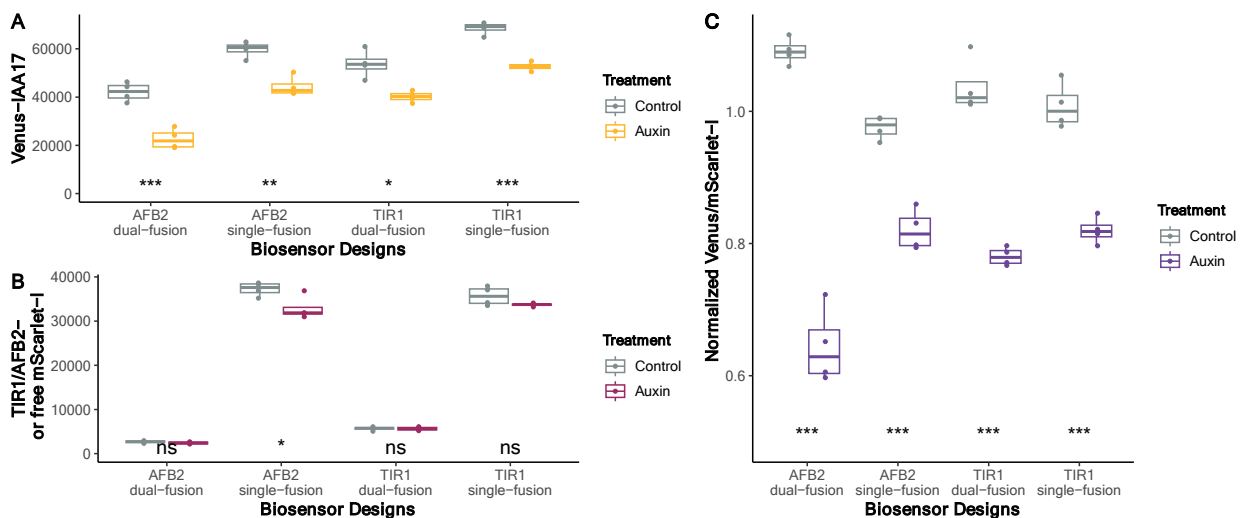

**Supporting Figure S4. Comparison of steady-state fluorescent expression levels of single- and dual-fusion biosensors in W303 yeast.** Comparison of **(A)** Venus-Aux/IAA17, **(B)** TIR1/AFB2-mScarlet-I or free

*mScarlet-I*, and (C) Normalized Venus/*mScarlet-I* ratios at steady state (about 2.5 hours after treatment) are shown. Points represent the mean fluorescence of samples of  $\sim 10^4$  cells from cultures measured every 30 minutes over 120 minutes after the treatments. T-test statistics comparing the response to 50  $\mu\text{M}$  auxin versus control for each biosensor design are shown with “ns” meaning “not significantly different”, one star and three stars meaning significantly different with  $p < 0.05$  and  $p < 0.005$ , respectively.

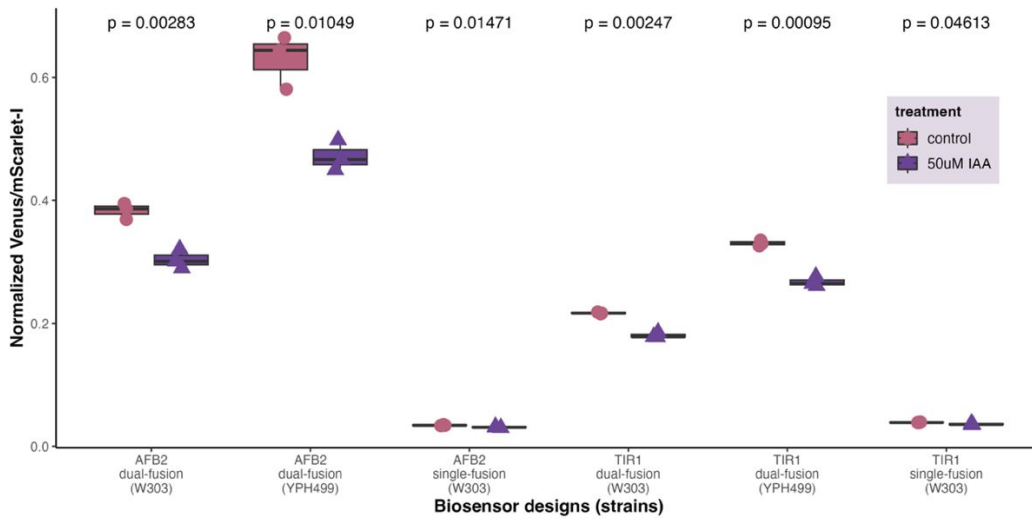

**Supporting Figure S5. Comparison of steady-state biosensors responses in different yeast strains.** Fluorescent measurements of three samples at after 180 minutes post treatments are shown. Each dot represents the mean fluorescence values measured by flow cytometry. Some points are overlapping. P-values for T-tests comparing the response to 50  $\mu\text{M}$  auxin (pink) versus control (purple) for each biosensor design and/or strain are shown.

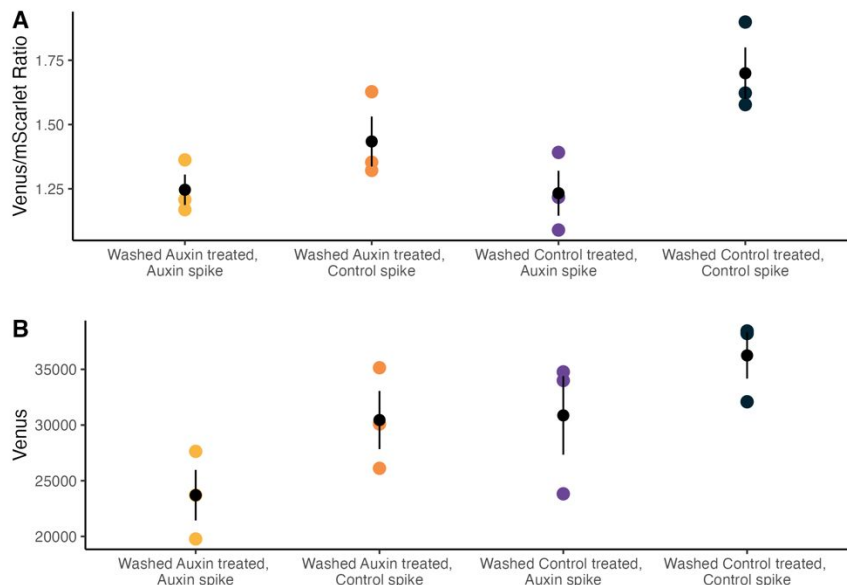

**Supporting Figure S6. Testing the reversibility of the dual-fusion AFB2 biosensor.** After the auxin-induced VENUS-Aux/IAA degradation assay at the exponential phase, the cultures were washed to remove auxin and resuspended in 3 mL of fresh SCM. These cultures were split evenly into two tubes to allow them to be treated with control or auxin treatments. Approximately 12 hours after washing, the signal from the previously auxin-treated culture (orange) had recovered about 50% of the difference between the washed auxin-treated cultures (yellow and purple) and the washed control culture (black).

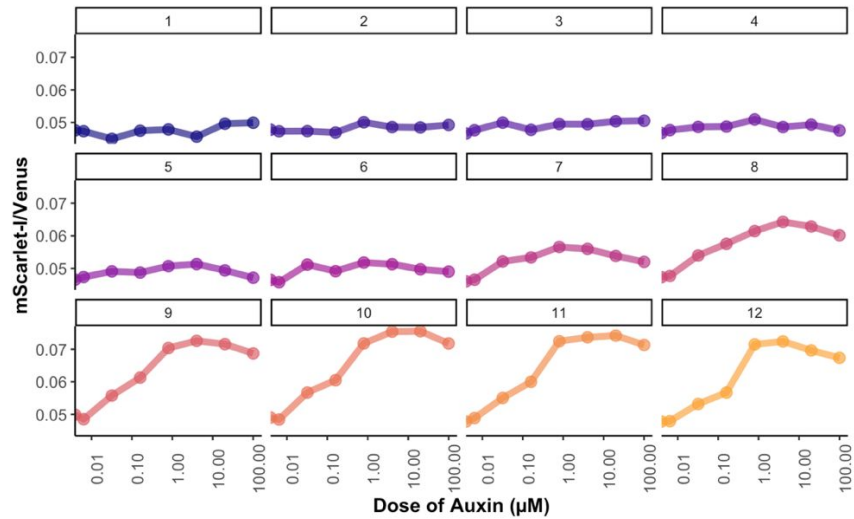

**Supporting Figure S7. Dose and time response of the AFB2 dual-fusion biosensor.** Exponential phase cultures of AFB2 dual-fusion biosensor expressing yeast were measured via flow cytometry. Each numbered panel represents a 30-minute time interval. Cultures were treated with different doses of auxin (x-axis) at time-point 5. Each point represents the mean fluorescence of a sample, comprising approximately  $10^4$  cells.

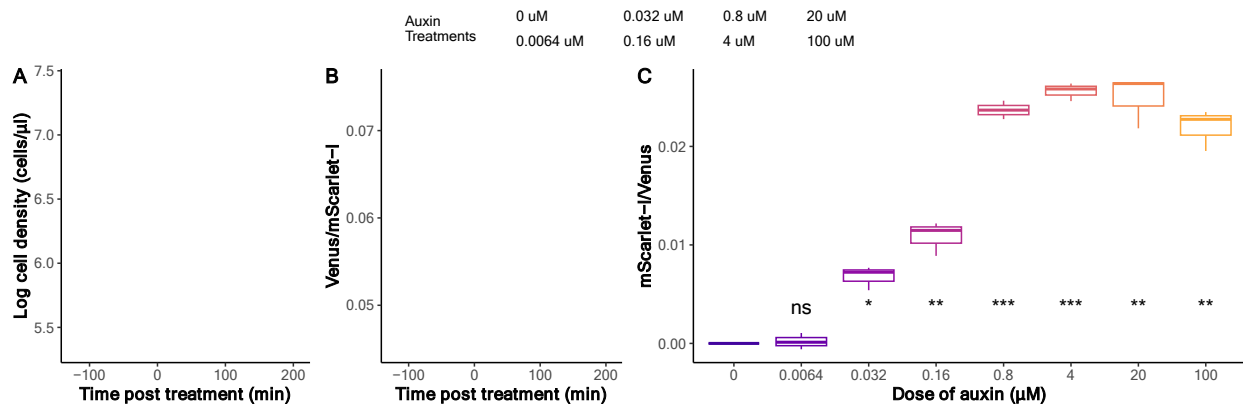

**Supporting Figure S8. Defining conditions for AFB2 dual-fusion biosensor dose-response assay.** Time response of (A) cell growth and (B) Venus-Aux/IAA17 to AFB2-mScarlet-I ratio in response to different doses of auxin. Points represent the mean fluorescence of samples of approximately  $10^4$  cells from cultures measured every 30 minutes over a 6-hour experiment. (C) The box plot illustrates the foldchange between

different doses of auxin treatment and solvent control at steady-state, which we defined as the last four measurements for each culture, more than 2 hours after treatment. T-test statistics show the comparison for each auxin treatment versus control (0  $\mu$ M), with “ns” meaning “not significantly different”, one, two, and three stars meaning significantly different with  $p < 0.05$ ,  $p < 0.01$ , and  $p < 0.005$ , respectively.

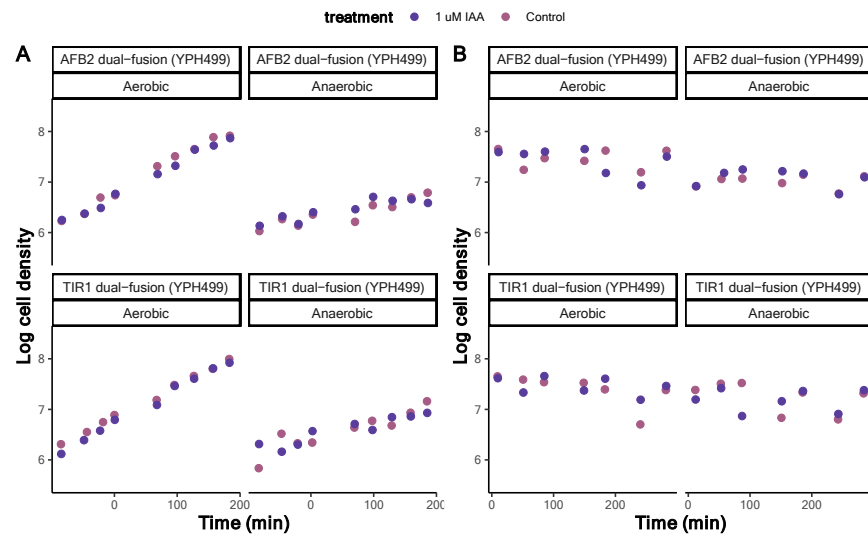

**Supporting Figure S9. Cell growth conditions during auxin biosynthesis assays.** (A) Cell density measurements during the exponential phase of yeast cultures expressing different biosensors under aerobic (shaken at 300 RPM) and anaerobic (fermentative, static) growth conditions. Density was measured by flow cytometry. (B) Cell density measurements during stationary phase under aerobic and anaerobic growth conditions. The yeast cells carrying biosensors were continuously cultured from the preceding exponential phase and measurements began after 48-hours of incubation for determining auxin accumulation. The cultures were diluted 10x before the measurements via cytometry.

**Table S1: List of primers**

| <b>Oligo ID</b> | <b>Name</b>                   | <b>Purpose</b>              | <b>Sequence</b>                                              |
|-----------------|-------------------------------|-----------------------------|--------------------------------------------------------------|
| oWL272          | GPDP-to_TIR1_reverse          | Biosensors cloning          | CACACCACACCTGCACAAAACCTAATCCGTTAGTAGTAATGATTGCCTGG           |
| oWL271          | backbone2_(BbvCI_mut)_reverse | Biosensors cloning          | CACACCACACCTGCACAAAAGGATCAGTTGGGTGCACGAGTGGG                 |
| oWL 270         | backbone2_forward             | Biosensors cloning          | CACACCACACCTGCACAATGGCCCGGGGATCCACTAG                        |
| oWL 269         | mScarlet-I_TCYC_reverse       | Biosensors cloning          | CACACCACACCTGCACAAGCCAAATTAAGCCTTCGAGCGTCCCA                 |
| oWL 268         | mScarlet-I_TCYC_forward       | Biosensors cloning          | CACACCACACCTGCACAACAATGGTGAGCAAGGGCGAGGCA                    |
| oWL 267         | ERBV-1-2a_reverse             | Biosensors cloning          | CACACCACACCTGCACAAATTGGACCTGGATTCAATTCAACATCACC              |
| oWL 266         | ERBV-1-2a_forward             | Biosensors cloning          | CACACCACACCTGCACAAGGTTCTGGTGGTGCTACTAATTTTTC                 |
| oWL 265         | GPDP_to_AFB2_reverse          | Biosensors cloning          | CACACCACACCTGCACAAAACCGAGAATCCACACAAATGGCGGC                 |
| oWL 264         | GPDP_to_AFB2_forward          | Biosensors cloning          | CACACCACACCTGCACAATGAGTTTATCATTATCAATACTCGCCATTTC            |
| oWL 263         | backbone1_reverse             | Biosensors cloning          | CACACCACACCTGCACAACCTCAAGCTTATCGATACCGTCGACCTCGAGG           |
| oWL 262         | backbone1_forward             | Biosensors cloning          | CACACCACACCTGCACAATCCTCAGCATCTTTACTTTCACCAGCGTTTCTGGG        |
| oWL14           | TCYC1_seq_R                   | Plasmid sequencing          | GGGCGTGAATGTAAGCGTGACATAACTAAT                               |
| oWL15           | PGPD_seq_F                    | Plasmid sequencing          | CGGTAGGTATTGATTGTAATTCTG                                     |
| oWL5            | URA3_R                        | Checking genome integration | CTGTTCCAGCCCATATCCAATTCC                                     |
| oWL4            | LEU2_R                        | Checking genome integration | CTACAGAAGCAGAAATACACGCAGTCA                                  |
| oWL3            | HIS3_R                        | Checking genome integration | CGAAAATTTGGGTGGCCAACCTCTC                                    |
| oWL2            | TRP1_R                        | Checking genome integration | ATGGCTTGGCATGGCGATTTC                                        |
| oWL1            | tCYC1_F                       | Checking genome integration | ATTAGTTATGTCACGCTTACATTACGCCC                                |
| oWL107          | 10B2_Seq_F                    | Orthorep plasmid sequencing | GCTGTCGCCGAAGAAGTTAAG                                        |
| oWL106          | TADH1_Seq_R                   | Orthorep plasmid sequencing | GAGAAAGCAACCTGACCTACAGG                                      |
| oWL084          | FDP_p10B2_COI1_F              | Orthorep cloning            | ATTGAGCGGCCGCGGATCCTCATGTGAGACGGAGG                          |
| oWL083          | FDP_p10B2_COI1_(NheI)_R       | Orthorep cloning            | CAGGATCCTCCATGCTAGCTTTACATGTCTATGAGCTTATCACATGTTTC           |
| oWL075          | FDP_p10B2_TIR1_F              | Orthorep cloning            | ATTGAGCGGCCGCGGATCCTCATGTGAGACGGAGG                          |
| oWL074          | FDP_p10B2_TIR1_(NheI)_R       | Orthorep cloning            | AGGCTATTGCTTCTGCATGCTAGCTTACATGTCTATGAGCTTATCACATGTTTC       |
| oWL073          | TIR1_3XFLAG6XHis_F            | Orthorep cloning            | AGACATGTAAAGCTAGCATGCAGAAGCGAATAGCCTTGTGCTTTCC               |
| oWL072          | TIR1_3XFLAG6XHis_(NotI)_R     | Orthorep cloning            | GTCTCACATGAGGATCCGCGGCCGCTCAATGGTGGTGATGATGGTGTGCTTGTGCTATCG |

**Table S2: List of plasmids and *E.coli* cells**

| Plasmid ID   | Name/Genotype                                                                                                                         | Source        |
|--------------|---------------------------------------------------------------------------------------------------------------------------------------|---------------|
| TOP10        | F- mcrA (mrr-hsdRMS-mcrBC) 80lacZ M15 lacX74 recA1 ara 139 (ara-leu)7697 galU galK rpsL (StrR) endA1 nupG                             | ThermoFisher  |
| NEB® 10-beta | Δ(ara-leu) 7697 araD139 fhuA ΔlacX74 galK16 galE15 e14- φ80dlacZΔM15 recA1 relA1 endA1 nupG rpsL (StrR) rph spoT1 Δ(mrr-hsdRMS-mcrBC) | NEB®          |
| pWL218       | pAR318: TP-DNAP1-HIS3                                                                                                                 | This paper    |
| pWL219       | pAR633: TP-DNAP1-HIS3                                                                                                                 | This paper    |
| pWL220       | FDP-p10B2-URA3                                                                                                                        | This paper    |
| pWL235       | FDP_p10B2_TIR1_3XFLAG_6XHis                                                                                                           | This paper    |
| pWL233       | pGP4G2-Venus-IAA17-ERBV2a-mScarlet                                                                                                    | This paper    |
| pWL273       | pGP4G2-Venus-IAA17-ERBV2a-AFB2-mScarlet                                                                                               | This paper    |
| pWL274       | pGP4G2-Venus-IAA17-ERBV2a-TIR1-mScarlet                                                                                               | This paper    |
| pWL63        | pGP8G2_TIR1f_TIR11_3xF6xH                                                                                                             | Nemhauser lab |
| pWL57        | pGP8G2_AFB2f_AFB2l_3xF6xH                                                                                                             | Nemhauser lab |

**Table S3: List of *S. cerevisiae* strains**

| Yeast ID | Name/Genotype                                                                                                                                                       | Source        |
|----------|---------------------------------------------------------------------------------------------------------------------------------------------------------------------|---------------|
| yWL161   | pGP8G2_TIR1f_TIR11_3xF6xH x pGP4G2-VENUS-IAA17-ERBV-1-2a-mScarlet                                                                                                   | This paper    |
| yWL162   | pGP8G2_AFB2f_AFB2l_3xF6xH x pGP4G2-VENUS-IAA17-ERBV-1-2a-mScarlet                                                                                                   | This paper    |
| yWL185   | pGP4G2-eGFP-ERBV-IAA17-TIR1-mScarlet x W303                                                                                                                         | This paper    |
| yWL186   | pGP4G2-Venus-IAA17-2A-AFB2-mScarlet x W303                                                                                                                          | This paper    |
| yWL209   | pGP4G2-eGFP-ERBV-IAA17-TIR1-mScarlet x YPH499                                                                                                                       | This paper    |
| yWL210   | pGP4G2-Venus-IAA17-2A-AFB2-mScarlet x YPH499                                                                                                                        | This paper    |
| yWL159   | pGP4G2-VENUS-IAA17-ERBV2a-mScarlet x W814-29B                                                                                                                       | This paper    |
| yWL156   | FDP_p10B2_TIR1_3XFLAG_6XHis x pAR633: TP-DNAP1-HIS3 x pGP4G2-Venus-IAA17-ERBV2a-mScarlet x F102 MATa rho0 (petite) ura3 his3 leu2 trp1 flo1 with WT p1 and WT p2    | This paper    |
| yWL155   | FDP_p10B2_TIR1_3XFLAG_6XHis x pAR318: TP-DNAP1-HIS3 x pGP4G2-yEGFP-IAA17-ERBV-1-2a-mScarlet x F102 MATa rho0 (petite) ura3 his3 leu2 trp1 flo1 with WT p1 and WT p2 | This paper    |
| yWL145   | pGP4G2-Venus-IAA17-ERBV2a-mScarlet x F102                                                                                                                           | This paper    |
| yWL97    | F102 MATa rho0 (petite) ura3 his3 leu2 trp1 flo1 with WT p1 and WT p2                                                                                               | This paper    |
| yWL136   | W303 (MATα ade2-1 ura3-1 his3-11,15 trp1-1 leu2-3,112 can1-100)                                                                                                     | GG Lab        |
| yWL1     | W814-29B (MATα ade2-1 trp1-1 can1-100 ura3-1 leu2-3,112 his3-11,15)                                                                                                 | Nemhauser lab |
| yWL2     | W303-1A ADE2+ (MATa, leu2-3,112 trp1-1 can1-100 ura3-1 his3-11,15 ybp1-1)                                                                                           | Nemhauser lab |
| yWL64    | YPH499 (MATa ura3-52 lys2-801_amber ade2-101_ochre trp1-Δ63 his3-Δ200 leu2-Δ1)                                                                                      | Nemhauser lab |



# Supporting Text S1: Supplemental reproducible analysis for: Genetically encoded, noise-tolerant, auxin biosensors in yeast

## Table of Contents

|                                                                                                                                                  |     |
|--------------------------------------------------------------------------------------------------------------------------------------------------|-----|
| Figure 4: Time-course response and ratiometric measurement of the single-fusion biosensors .....                                                 | 10  |
| Time-course degradation .....                                                                                                                    | 10  |
| Single-fusion CV plot .....                                                                                                                      | 12  |
| Data and analysis for dose-response curves of AFB2 and TIR1 biosensors .....                                                                     | 14  |
| AFB2-based biosensor (yWL210 AFB2 in cis, single ratiometric construct) .....                                                                    | 14  |
| TIR1-based biosensor (yWL209 TIR in cis, single ratiometric construct) .....                                                                     | 19  |
| Figure 6A and 6B: Plot dose-response curve with ggplot .....                                                                                     | 28  |
| Figure 5A and Supporting Figure S3: Auxin-induced degradation and time-course assay<br>for the biosensors in cis in multiple yeast strains. .... | 32  |
| Supporting Figure S2: CV plots .....                                                                                                             | 38  |
| Figure 5B: Foldchange between the 50 $\mu$ M auxin treatment and solvent control for each<br>biosensor design.....                               | 78  |
| Figure 6: Dose-response models of biosensors .....                                                                                               | 87  |
| Figure 7: Auxin quantification by AFB2 dual-fusion Biosensor vs LC-MS.....                                                                       | 89  |
| Figure 8A: Dose-response curve for auxin at early stationary phase, 2 replicates.....                                                            | 102 |
| Figure 8B: Auxin accumulation in different yeast cultures measured by the AFB2 dual-<br>fusion biosensor .....                                   | 107 |
| Figure 8C: The dual-fusion AFB2 biosensor predicts that auxin accumulates in stationary<br>phase cultures.....                                   | 113 |
| Supplement 6B: The bar plot of the foldchange between different doses of auxin<br>treatment and solvent control.....                             | 129 |
| Session Info and Packages/Libraries .....                                                                                                        | 141 |

## Figure 4: Time-course response and ratiometric measurement of the single-fusion biosensors

### Time-course degradation

```
# Read in flow sets from 20200611 and 20200614
flowSet <- read.plateSet(path = "~/Google Drive/Shared
drives/PlantSynBioLab/Data/Mahbub/FlowSets/",
  pattern = "202006", phenoData = "annotation.txt")
flowSet <- flowSet[which(flowSet@phenoData@data$strain %in% c("T1T1",
"A2A2"))]

write.flowSet(flowSet, "flowSets/single-time-course")

flowSet <- read.flowSet(path = "Data for publication/single-time-course",
phenoData = "annotation.txt")
# Load gates for this strain/cytometer
load("Data for publication/PSB_Accuri_W303.RData")
data_sum <- summarizeFlow(flowset = flowSet, ploidy = "diploid", only =
"singlets",
  channel = c("FL1.A", "FL4.A"))
# # [1] "Gating with diploid singlet gates..."
time0_14 <- data_sum %>%
  dplyr::filter(name == "21D10.fcs") %>%
  pull(btime)
time0_11 <- data_sum %>%
  dplyr::filter(name == "11G02.fcs") %>%
  pull(btime)
data_sum <- data_sum %>%
  mutate(time = case_when(folder == "20200611_AFB_epistasis" ~ .$btime -
time0_11,
  folder == "20200614_AFB_epistasis" ~ .$btime - time0_14))

shapes <- c(DMSO = 1, IAA = 16)
lines <- c(DMSO = 2, IAA = 1)

data_sum$ratio <- data_sum$FL1.Amean/data_sum$FL4.Amean
data_sum$Venus <- data_sum$FL1.Amean/10000
data_sum_long <- data_sum %>%
  dplyr::select(time, treatment, yWL, folder, strain, ratio, Venus) %>%
  pivot_longer(cols = c(ratio, Venus), names_to = "parameter")
deg_plot <- ggplot(data = subset(data_sum_long, yWL == "166"), aes(x = time,
y = value,
  shape = treatment, color = treatment, group = interaction(treatment,
folder))) +
  geom_point() + labs(y = "Intensity (AU)", x = "Time post treatment
(min)") +
```

```

facet_wrap(~fct_rev(parameter), scales = "free") +
scale_shape_manual(values = shapes) +
  geom_line(aes(linetype = treatment)) + scale_linetype_manual(values =
lines) +
  scale_color_viridis_d(option = "D", end = 0.75, direction = -1) +
theme_test()
deg_plot

```

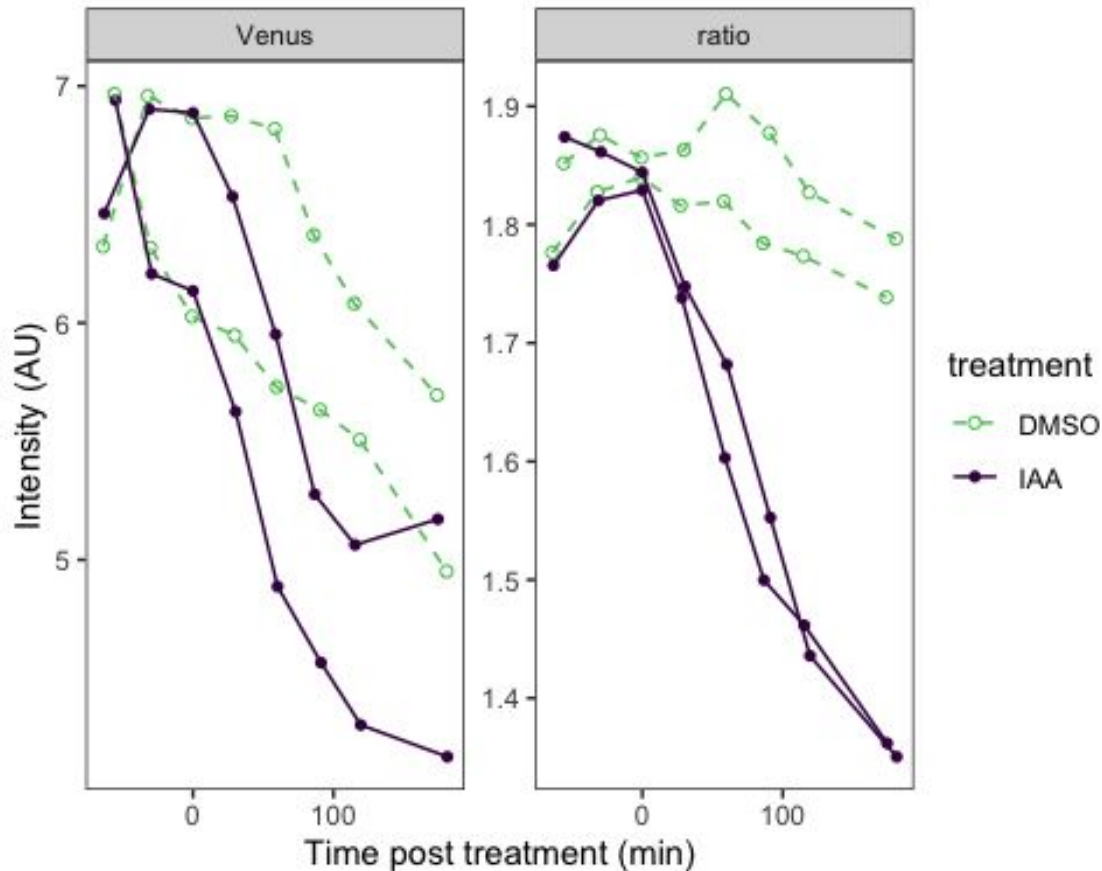

```

data <- flowTime::tidyFlow(flowSet, ploidy = "diploid", only = "singlets")
## [1] "No further gating applied."
## [1] "Converting events..."
## Joining with `by = join_by(name)`

# get late time points for one strain
last_reading <- tail(unique(data[which(data$yWL == 166), "name"]), 4) %>%
  head(2)
data <- dplyr::filter(data, yWL == "166" & name %in% last_reading)
# clean this up, cut off zeros
data <- subset(data, FL1.A > 1 & FL4.A > 1)
data$FLratio <- data$FL1.A/data$FL4.A
range(data$FL1.A)
## [1] 21 697262
# calculate cvs

```

```
sd(data$FLratio)/mean(data$FLratio)
# # [1] 0.1842678
range(data$FLratio)
# # [1] 0.002628614 3.836085188
```

*Single-fusion CV plot*

```
# calculate normalized values
data$Venus <- data$FL1.A/median(data$FL1.A)
data$mScarlet <- data$FL4.A/median(data$FL4.A)
data$ratio <- data$FLratio/median(data$FLratio)
# make a tidy, long dataset
data_long <- data %>%
  dplyr::select(treatment, Venus, mScarlet, ratio) %>%
  pivot_longer(cols = c(Venus, mScarlet, ratio), names_to = "parameter",
values_to = "value")

# need to also format CVs appropriately for annotating
cv <- function(x) return(round(sd(x)/mean(x), 2))
CVs <- data %>%
  group_by(treatment) %>%
  summarise(across(where(is_double), cv))
CVs <- CVs %>%
  dplyr::select(treatment, Venus, mScarlet, ratio) %>%
  pivot_longer(cols = c(Venus, mScarlet, ratio), names_to = "parameter",
values_to = "value")

CV_plot <- ggplot(data = data_long, mapping = aes(x = value, color =
treatment)) +
  geom_density() + coord_cartesian(x = c(0, 2)) + labs(x = "median
normalized intensity",
color = "treatment") + facet_grid(fct_relevel(parameter, "Venus") ~ .) +
theme_test() +
  geom_text(data = subset(CVs, treatment == "IAA"), aes(label = paste0("CV
= ",
value)), x = 0.3, y = 2) + geom_text(data = subset(CVs, treatment ==
"DMSO"),
aes(label = paste0("CV = ", value)), x = 1.8, y = 2) +
scale_color_viridis_d(option = "D",
end = 0.75, direction = -1)
CV_plot
```

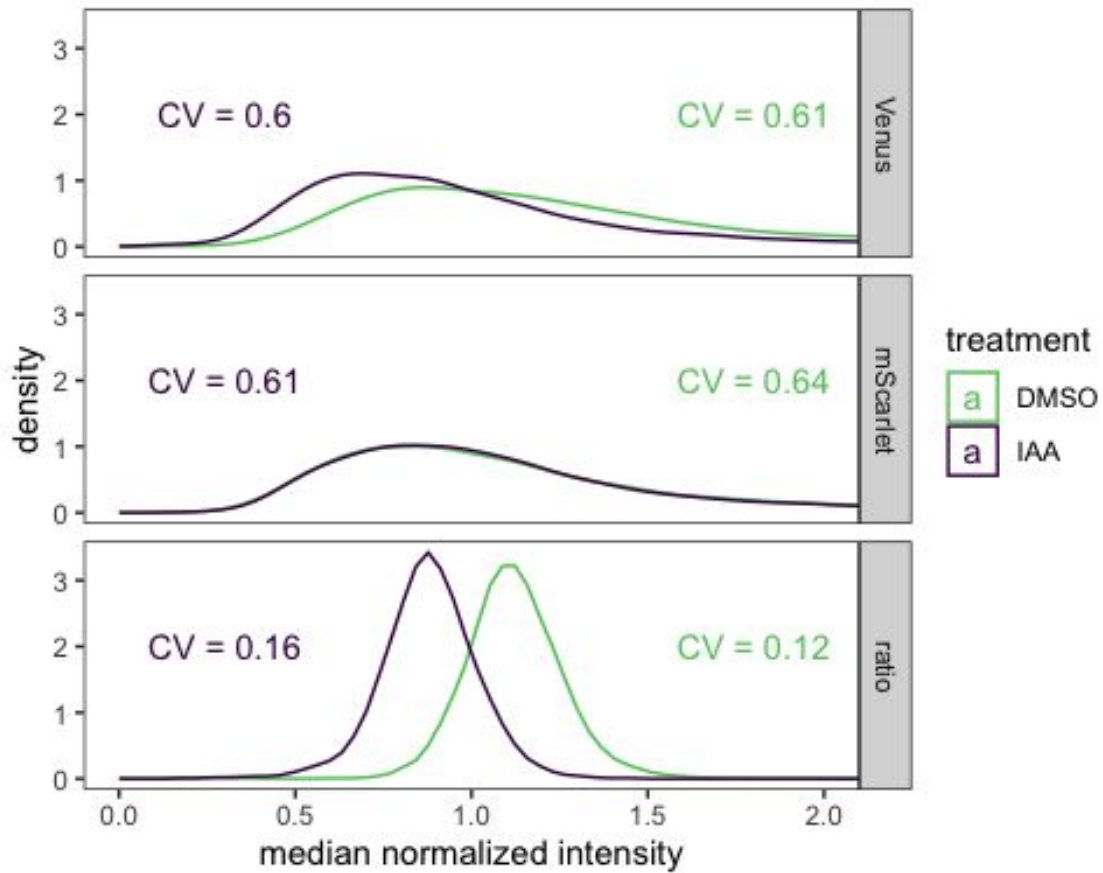

```

layout <- "
AAAAB
CCCCC
"
CV_plot + guide_area() + deg_plot + plot_annotation(tag_levels = "A") +
plot_layout(guides = "collect",
  heights = c(5, 2), design = layout)

```

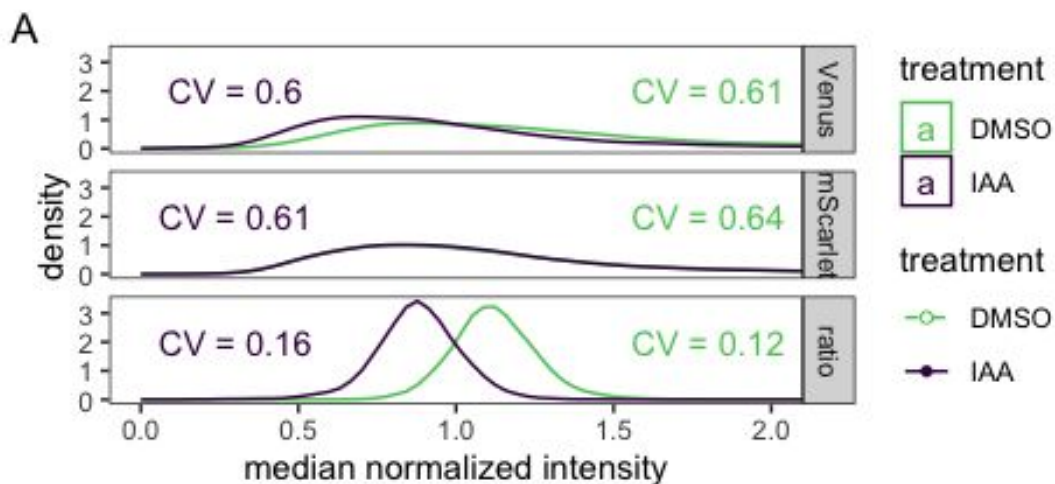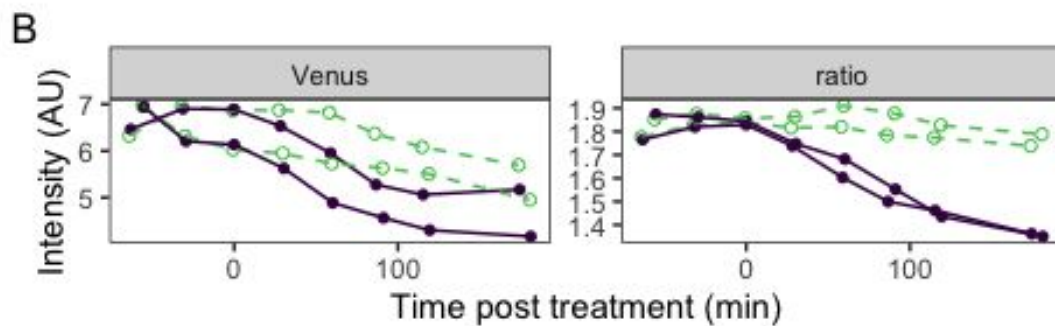

```
ggsave("ratio-deg.pdf", width = 5, height = 5)
ggsave("ratio-deg.png", width = 5, height = 5)
```

## Data and analysis for dose-response curves of AFB2 and TIR1 biosensors

*AFB2-based biosensor (yWL210 AFB2 in cis, single ratiometric construct)*

```
plate_all_210 <- read.plateSet(path = "Data for
publication/11212022_DRA_overlaydata/Combine Data_yWL210/All data/",
  pattern = "DRA-*")

annotation <- createAnnotation(yourFlowSet = plate_all_210)
write.csv(annotation, "Data for
publication/11212022_DRA_overlaydata/overlaydata_annotation_yWL210_datagated_
exJan31.csv")

annotation <- read.csv("Data for
publication/11212022_DRA_overlaydata/overlaydata_annotation_yWL210_datagated_
exJan31.csv")
```

```

aplate_all_210 <- annotateFlowSet(yourFlowSet = plate_all_210, annotation_df
= annotation,
  mergeBy = "name")
head(rownames(pData(aplate_all_210)))
# # [1] "1Pat-01182023-Biosensors_DRA09_Experiment_yWL210_IAA 0 uM.fcs"
# # [2] "1Pat-01182023-Biosensors_DRA09_Experiment_yWL210_IAA 0.0000102
uM.fcs"
# # [3] "1Pat-01182023-Biosensors_DRA09_Experiment_yWL210_IAA 0.0000512
uM.fcs"
# # [4] "1Pat-01182023-Biosensors_DRA09_Experiment_yWL210_IAA 0.000256
uM.fcs"
# # [5] "1Pat-01182023-Biosensors_DRA09_Experiment_yWL210_IAA 0.00128 uM.fcs"
# # [6] "1Pat-01182023-Biosensors_DRA09_Experiment_yWL210_IAA 0.0064 uM.fcs"
head(pData(aplate_all_210))
# #
name
# # 1Pat-01182023-Biosensors_DRA09_Experiment_yWL210_IAA 0 uM.fcs
1Pat-01182023-Biosensors_DRA09_Experiment_yWL210_IAA 0 uM.fcs
# # 1Pat-01182023-Biosensors_DRA09_Experiment_yWL210_IAA 0.0000102 uM.fcs
1Pat-01182023-Biosensors_DRA09_Experiment_yWL210_IAA 0.0000102 uM.fcs
# # 1Pat-01182023-Biosensors_DRA09_Experiment_yWL210_IAA 0.0000512 uM.fcs
1Pat-01182023-Biosensors_DRA09_Experiment_yWL210_IAA 0.0000512 uM.fcs
# # 1Pat-01182023-Biosensors_DRA09_Experiment_yWL210_IAA 0.000256 uM.fcs
1Pat-01182023-Biosensors_DRA09_Experiment_yWL210_IAA 0.000256 uM.fcs
# # 1Pat-01182023-Biosensors_DRA09_Experiment_yWL210_IAA 0.00128 uM.fcs
1Pat-01182023-Biosensors_DRA09_Experiment_yWL210_IAA 0.00128 uM.fcs
# # 1Pat-01182023-Biosensors_DRA09_Experiment_yWL210_IAA 0.0064 uM.fcs
1Pat-01182023-Biosensors_DRA09_Experiment_yWL210_IAA 0.0064 uM.fcs
# #
folder
# # 1Pat-01182023-Biosensors_DRA09_Experiment_yWL210_IAA 0 uM.fcs
DRA-01182023_read9
# # 1Pat-01182023-Biosensors_DRA09_Experiment_yWL210_IAA 0.0000102 uM.fcs
DRA-01182023_read9
# # 1Pat-01182023-Biosensors_DRA09_Experiment_yWL210_IAA 0.0000512 uM.fcs
DRA-01182023_read9
# # 1Pat-01182023-Biosensors_DRA09_Experiment_yWL210_IAA 0.000256 uM.fcs
DRA-01182023_read9
# # 1Pat-01182023-Biosensors_DRA09_Experiment_yWL210_IAA 0.00128 uM.fcs
DRA-01182023_read9
# # 1Pat-01182023-Biosensors_DRA09_Experiment_yWL210_IAA 0.0064 uM.fcs
DRA-01182023_read9
# #
# # 1Pat-01182023-Biosensors_DRA09_Experiment_yWL210_IAA 0 uM.fcs X
# # 1Pat-01182023-Biosensors_DRA09_Experiment_yWL210_IAA 0.0000102 uM.fcs 1
# # 1Pat-01182023-Biosensors_DRA09_Experiment_yWL210_IAA 0.0000512 uM.fcs 2
# # 1Pat-01182023-Biosensors_DRA09_Experiment_yWL210_IAA 0.000256 uM.fcs 3
# # 1Pat-01182023-Biosensors_DRA09_Experiment_yWL210_IAA 0.00128 uM.fcs 4
# # 1Pat-01182023-Biosensors_DRA09_Experiment_yWL210_IAA 0.0064 uM.fcs 5
# #

```

```

treatment
# # 1Pat-01182023-Biosensors_DRA09_Experiment_yWL210_IAA 0 uM.fcs
0 uM
# # 1Pat-01182023-Biosensors_DRA09_Experiment_yWL210_IAA 0.0000102 uM.fcs
0.0000102 uM
# # 1Pat-01182023-Biosensors_DRA09_Experiment_yWL210_IAA 0.0000512 uM.fcs
0.0000512 uM
# # 1Pat-01182023-Biosensors_DRA09_Experiment_yWL210_IAA 0.000256 uM.fcs
0.000256 uM
# # 1Pat-01182023-Biosensors_DRA09_Experiment_yWL210_IAA 0.00128 uM.fcs
0.00128 uM
# # 1Pat-01182023-Biosensors_DRA09_Experiment_yWL210_IAA 0.0064 uM.fcs
0.0064 uM
# #
dose
# # 1Pat-01182023-Biosensors_DRA09_Experiment_yWL210_IAA 0 uM.fcs
0.00e+00
# # 1Pat-01182023-Biosensors_DRA09_Experiment_yWL210_IAA 0.0000102 uM.fcs
1.02e-05
# # 1Pat-01182023-Biosensors_DRA09_Experiment_yWL210_IAA 0.0000512 uM.fcs
5.12e-05
# # 1Pat-01182023-Biosensors_DRA09_Experiment_yWL210_IAA 0.000256 uM.fcs
2.56e-04
# # 1Pat-01182023-Biosensors_DRA09_Experiment_yWL210_IAA 0.00128 uM.fcs
1.28e-03
# # 1Pat-01182023-Biosensors_DRA09_Experiment_yWL210_IAA 0.0064 uM.fcs
6.40e-03
# #
replicate
# # 1Pat-01182023-Biosensors_DRA09_Experiment_yWL210_IAA 0 uM.fcs
1
# # 1Pat-01182023-Biosensors_DRA09_Experiment_yWL210_IAA 0.0000102 uM.fcs
1
# # 1Pat-01182023-Biosensors_DRA09_Experiment_yWL210_IAA 0.0000512 uM.fcs
1
# # 1Pat-01182023-Biosensors_DRA09_Experiment_yWL210_IAA 0.000256 uM.fcs
1
# # 1Pat-01182023-Biosensors_DRA09_Experiment_yWL210_IAA 0.00128 uM.fcs
1
# # 1Pat-01182023-Biosensors_DRA09_Experiment_yWL210_IAA 0.0064 uM.fcs
1
# #
date
# # 1Pat-01182023-Biosensors_DRA09_Experiment_yWL210_IAA 0 uM.fcs 18-
Jan-23
# # 1Pat-01182023-Biosensors_DRA09_Experiment_yWL210_IAA 0.0000102 uM.fcs 18-
Jan-23
# # 1Pat-01182023-Biosensors_DRA09_Experiment_yWL210_IAA 0.0000512 uM.fcs 18-
Jan-23
# # 1Pat-01182023-Biosensors_DRA09_Experiment_yWL210_IAA 0.000256 uM.fcs 18-

```



```

Jan-23
# # 1Pat-01182023-Biosensors_DRA09_Experiment_yWL210_IAA 0.00128 uM.fcs 18-
Jan-23
# # 1Pat-01182023-Biosensors_DRA09_Experiment_yWL210_IAA 0.0064 uM.fcs 18-
Jan-23

plate_all_210_sum <- summarizeFlow(aplate_all_210, channel = c("BL1.A",
"YL1.A"),
  gated = TRUE)
# # [1] "Summarizing all events..."
### Dose-response curve Comparing Log-Logistic and Weibull models (Figure 2
in
### Ritz (2009))

fitdrc.m1 <- drm(YL1.Amean/BL1.Amean ~ dose, data = plate_all_210_sum, fct =
LL.4())
fitdrc.m2 <- drm(YL1.Amean/BL1.Amean ~ dose, data = plate_all_210_sum, fct =
W1.4())
# fitdrc.m3 <- drm(YL1.Amean/BL1.Amean~dose, data=plate_all_210_sum, fct =
# W2.4())

model.LL4_all_210 <- drm(YL1.Amean/BL1.Amean ~ dose, data =
plate_all_210_sum, fct = LL.4(names = c("Slope",
"Lower Limit", "Upper Limit", "ED50")))
plot(model.LL4_all_210, broken = TRUE, type = "none", lty = 1, lwd = 5, xlab
= "Extracellular IAA concentration (uM)",
  ylab = "Response Signal")
# plot(model.LL4_all_210, broken = TRUE, col = 'black', add=TRUE)
plot(model.LL4_all_210, broken = TRUE, type = "confidence", col = "black",
add = TRUE)
summary(model.LL4_all_210)
# #
# # Model fitted: Log-Logistic (ED50 as parameter) (4 parms)
# #
# # Parameter estimates:
# #
# # Estimate Std. Error t-value p-value
# # Slope:(Intercept) -1.5032417 0.6338695 -2.3715 0.01985 *
# # Lower Limit:(Intercept) 0.0526074 0.0020790 25.3043 < 2e-16 ***
# # Upper Limit:(Intercept) 0.0845079 0.0021128 39.9976 < 2e-16 ***
# # ED50:(Intercept) 0.0403739 0.0159429 2.5324 0.01306 *
# # ---
# # Signif. codes: 0 '***' 0.001 '**' 0.01 '*' 0.05 '.' 0.1 ' ' 1
# #
# # Residual standard error:
# #
# # 0.01246335 (90 degrees of freedom)

```

```

replicate1_210 <- drm(YL1.Amean/BL1.Amean ~ dose, data =
subset(plate_all_210_sum,
  replicate == "1"), fct = LL.4())
replicate2_210 <- drm(YL1.Amean/BL1.Amean ~ dose, data =
subset(plate_all_210_sum,
  replicate == "2"), fct = LL.4())
replicate3_210 <- drm(YL1.Amean/BL1.Amean ~ dose, data =
subset(plate_all_210_sum,
  replicate == "3"), fct = LL.4())
replicate4_210 <- drm(YL1.Amean/BL1.Amean ~ dose, data =
subset(plate_all_210_sum,
  replicate == "4"), fct = LL.4())
replicate5_210 <- drm(YL1.Amean/BL1.Amean ~ dose, data =
subset(plate_all_210_sum,
  replicate == "5"), fct = LL.4())
replicate6_210 <- drm(YL1.Amean/BL1.Amean ~ dose, data =
subset(plate_all_210_sum,
  replicate == "6"), fct = LL.4())
replicate7_210 <- drm(YL1.Amean/BL1.Amean ~ dose, data =
subset(plate_all_210_sum,
  replicate == "7"), fct = LL.4())

plot(replicate1_210, broken = TRUE, add = TRUE, type = "all", col = "dark
green",
  lty = 2)
plot(replicate2_210, broken = TRUE, add = TRUE, type = "all", col = "dark
blue",
  lty = 2)
plot(replicate3_210, broken = TRUE, add = TRUE, type = "all", col = "yellow",
lty = 2)
plot(replicate4_210, broken = TRUE, add = TRUE, type = "all", col = "dark
grey",
  lty = 2)
plot(replicate5_210, broken = TRUE, add = TRUE, type = "all", col = "dark
orange",
  lty = 2)
plot(replicate6_210, broken = TRUE, add = TRUE, type = "all", col = "brown",
lty = 2)
plot(replicate7_210, broken = TRUE, add = TRUE, type = "all", col = "dark
red", lty = 2)

```

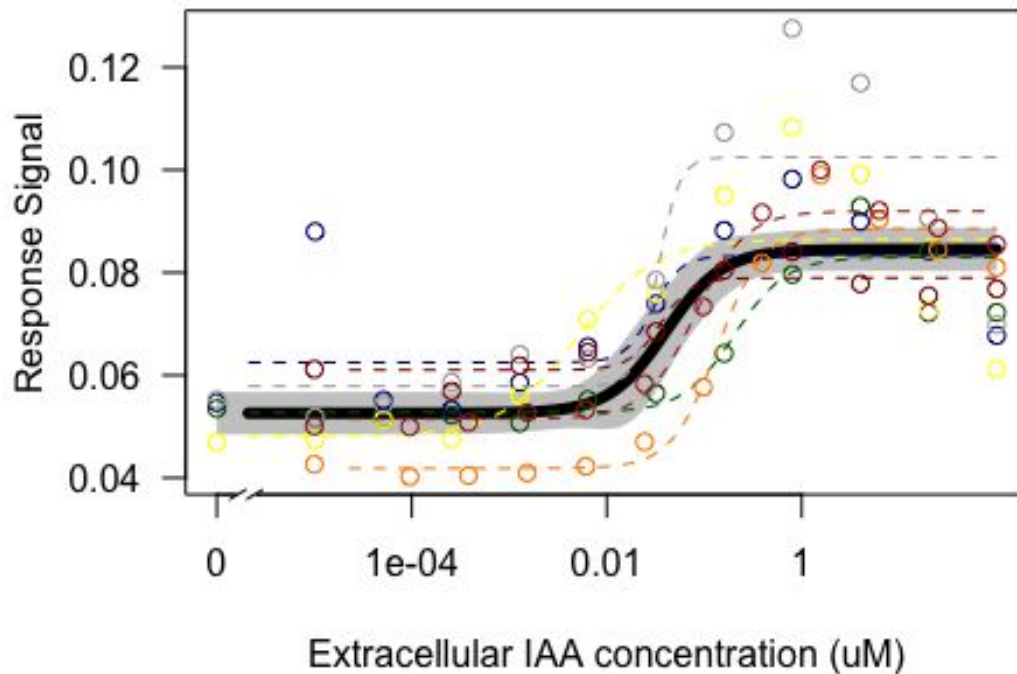

*TIR1-based biosensor (yWL209 TIR in cis, single ratiometric construct)*

```

plate_all_209 <- read.plateSet(path = "Data for
publication/11212022_DRA_overlaydata/Combine Data_yWL209/",
  pattern = "DRA-*")

annotation <- createAnnotation(yourFlowSet = plate_all_209)
write.csv(annotation, "Data for
publication/11212022_DRA_overlaydata/overlaydata_annotation_yWL209.csv")

annotation <- read.csv("Data for
publication/11212022_DRA_overlaydata/overlaydata_annotation_yWL209.csv")

aplate_all_209 <- annotateFlowSet(yourFlowSet = plate_all_209, annotation_df
= annotation,
  mergeBy = "name")
head(rownames(pData(aplate_all_209)))
## [1] "1Pat-03182023-Biosensors_DRA08_Experiment_yWL209-PC_IAA 0 uM.fcs"
## [2] "1Pat-03182023-Biosensors_DRA08_Experiment_yWL209-PC_IAA 0.0000102
uM.fcs"
## [3] "1Pat-03182023-Biosensors_DRA08_Experiment_yWL209-PC_IAA 0.0000512
uM.fcs"
## [4] "1Pat-03182023-Biosensors_DRA08_Experiment_yWL209-PC_IAA 0.000256

```

```

uM.fcs"
## [5] "1Pat-03182023-Biosensors_DRA08_Experiment_yWL209-PC_IAA 0.00128
uM.fcs"
## [6] "1Pat-03182023-Biosensors_DRA08_Experiment_yWL209-PC_IAA 0.0064
uM.fcs"
head(pData(plate_all_209))
##
name
## 1Pat-03182023-Biosensors_DRA08_Experiment_yWL209-PC_IAA 0 uM.fcs
1Pat-03182023-Biosensors_DRA08_Experiment_yWL209-PC_IAA 0 uM.fcs
## 1Pat-03182023-Biosensors_DRA08_Experiment_yWL209-PC_IAA 0.0000102 uM.fcs
1Pat-03182023-Biosensors_DRA08_Experiment_yWL209-PC_IAA 0.0000102 uM.fcs
## 1Pat-03182023-Biosensors_DRA08_Experiment_yWL209-PC_IAA 0.0000512 uM.fcs
1Pat-03182023-Biosensors_DRA08_Experiment_yWL209-PC_IAA 0.0000512 uM.fcs
## 1Pat-03182023-Biosensors_DRA08_Experiment_yWL209-PC_IAA 0.000256 uM.fcs
1Pat-03182023-Biosensors_DRA08_Experiment_yWL209-PC_IAA 0.000256 uM.fcs
## 1Pat-03182023-Biosensors_DRA08_Experiment_yWL209-PC_IAA 0.00128 uM.fcs
1Pat-03182023-Biosensors_DRA08_Experiment_yWL209-PC_IAA 0.00128 uM.fcs
## 1Pat-03182023-Biosensors_DRA08_Experiment_yWL209-PC_IAA 0.0064 uM.fcs
1Pat-03182023-Biosensors_DRA08_Experiment_yWL209-PC_IAA 0.0064 uM.fcs
##
folder
## 1Pat-03182023-Biosensors_DRA08_Experiment_yWL209-PC_IAA 0 uM.fcs
DRA-03182023_read8
## 1Pat-03182023-Biosensors_DRA08_Experiment_yWL209-PC_IAA 0.0000102 uM.fcs
DRA-03182023_read8
## 1Pat-03182023-Biosensors_DRA08_Experiment_yWL209-PC_IAA 0.0000512 uM.fcs
DRA-03182023_read8
## 1Pat-03182023-Biosensors_DRA08_Experiment_yWL209-PC_IAA 0.000256 uM.fcs
DRA-03182023_read8
## 1Pat-03182023-Biosensors_DRA08_Experiment_yWL209-PC_IAA 0.00128 uM.fcs
DRA-03182023_read8
## 1Pat-03182023-Biosensors_DRA08_Experiment_yWL209-PC_IAA 0.0064 uM.fcs
DRA-03182023_read8
##
X
## 1Pat-03182023-Biosensors_DRA08_Experiment_yWL209-PC_IAA 0 uM.fcs
1
## 1Pat-03182023-Biosensors_DRA08_Experiment_yWL209-PC_IAA 0.0000102 uM.fcs
2
## 1Pat-03182023-Biosensors_DRA08_Experiment_yWL209-PC_IAA 0.0000512 uM.fcs
3
## 1Pat-03182023-Biosensors_DRA08_Experiment_yWL209-PC_IAA 0.000256 uM.fcs
4
## 1Pat-03182023-Biosensors_DRA08_Experiment_yWL209-PC_IAA 0.00128 uM.fcs
5
## 1Pat-03182023-Biosensors_DRA08_Experiment_yWL209-PC_IAA 0.0064 uM.fcs
6
##
treatment

```

```
# # 1Pat-03182023-Biosensors_DRA08_Experiment_yWL209-PC_IAA 0 uM.fcs
0 uM
# # 1Pat-03182023-Biosensors_DRA08_Experiment_yWL209-PC_IAA 0.0000102 uM.fcs
0.0000102 uM
# # 1Pat-03182023-Biosensors_DRA08_Experiment_yWL209-PC_IAA 0.0000512 uM.fcs
0.0000512 uM
# # 1Pat-03182023-Biosensors_DRA08_Experiment_yWL209-PC_IAA 0.000256 uM.fcs
0.000256 uM
# # 1Pat-03182023-Biosensors_DRA08_Experiment_yWL209-PC_IAA 0.00128 uM.fcs
0.00128 uM
# # 1Pat-03182023-Biosensors_DRA08_Experiment_yWL209-PC_IAA 0.0064 uM.fcs
0.0064 uM
# #
dose
# # 1Pat-03182023-Biosensors_DRA08_Experiment_yWL209-PC_IAA 0 uM.fcs
0.00e+00
# # 1Pat-03182023-Biosensors_DRA08_Experiment_yWL209-PC_IAA 0.0000102 uM.fcs
1.02e-05
# # 1Pat-03182023-Biosensors_DRA08_Experiment_yWL209-PC_IAA 0.0000512 uM.fcs
5.12e-05
# # 1Pat-03182023-Biosensors_DRA08_Experiment_yWL209-PC_IAA 0.000256 uM.fcs
2.56e-04
# # 1Pat-03182023-Biosensors_DRA08_Experiment_yWL209-PC_IAA 0.00128 uM.fcs
1.28e-03
# # 1Pat-03182023-Biosensors_DRA08_Experiment_yWL209-PC_IAA 0.0064 uM.fcs
6.40e-03
# #
replicate
# # 1Pat-03182023-Biosensors_DRA08_Experiment_yWL209-PC_IAA 0 uM.fcs
4
# # 1Pat-03182023-Biosensors_DRA08_Experiment_yWL209-PC_IAA 0.0000102 uM.fcs
4
# # 1Pat-03182023-Biosensors_DRA08_Experiment_yWL209-PC_IAA 0.0000512 uM.fcs
4
# # 1Pat-03182023-Biosensors_DRA08_Experiment_yWL209-PC_IAA 0.000256 uM.fcs
4
# # 1Pat-03182023-Biosensors_DRA08_Experiment_yWL209-PC_IAA 0.00128 uM.fcs
4
# # 1Pat-03182023-Biosensors_DRA08_Experiment_yWL209-PC_IAA 0.0064 uM.fcs
4
# #
point
# # 1Pat-03182023-Biosensors_DRA08_Experiment_yWL209-PC_IAA 0 uM.fcs
8
# # 1Pat-03182023-Biosensors_DRA08_Experiment_yWL209-PC_IAA 0.0000102 uM.fcs
8
# # 1Pat-03182023-Biosensors_DRA08_Experiment_yWL209-PC_IAA 0.0000512 uM.fcs
8
# # 1Pat-03182023-Biosensors_DRA08_Experiment_yWL209-PC_IAA 0.000256 uM.fcs
8
```

```

# # 1Pat-03182023-Biosensors_DRA08_Experiment_yWL209-PC_IAA 0.00128 uM.fcs
8
# # 1Pat-03182023-Biosensors_DRA08_Experiment_yWL209-PC_IAA 0.0064 uM.fcs
8
# #
colony
# # 1Pat-03182023-Biosensors_DRA08_Experiment_yWL209-PC_IAA 0 uM.fcs
1
# # 1Pat-03182023-Biosensors_DRA08_Experiment_yWL209-PC_IAA 0.0000102 uM.fcs
1
# # 1Pat-03182023-Biosensors_DRA08_Experiment_yWL209-PC_IAA 0.0000512 uM.fcs
1
# # 1Pat-03182023-Biosensors_DRA08_Experiment_yWL209-PC_IAA 0.000256 uM.fcs
1
# # 1Pat-03182023-Biosensors_DRA08_Experiment_yWL209-PC_IAA 0.00128 uM.fcs
1
# # 1Pat-03182023-Biosensors_DRA08_Experiment_yWL209-PC_IAA 0.0064 uM.fcs
1

dat_sumGp_overlaydata_209 <- summarizeFlow(aplate_all_209, gated = TRUE,
channel = "BL1.A")
# # [1] "Summarizing all events..."

dat_sumRp_overlaydata_209 <- summarizeFlow(aplate_all_209, gated = TRUE,
channel = "YL1.A")
# # [1] "Summarizing all events..."

dat_sumGp_overlaydata_209$YL1.Amean <- dat_sumRp_overlaydata_209$YL1.Amean

### Dose-response curve

model.LL4_rep1_209 <- drm(YL1.Amean/BL1.Amean ~ dose, data =
subset(dat_sumGp_overlaydata_209,
replicate == "1"), fct = LL.4(names = c("Slope", "Lower Limit", "Upper
Limit",
"ED50")))
plot(model.LL4_rep1_209, type = "all", col = "red", lty = 1, lwd = 2, xlab =
"Extracellular IAA concentration (uM)",
ylab = "Red/Green Fluorescent Ratio")
plot(model.LL4_rep1_209, broken = TRUE, type = "confidence", col = "red", add
= TRUE)

```

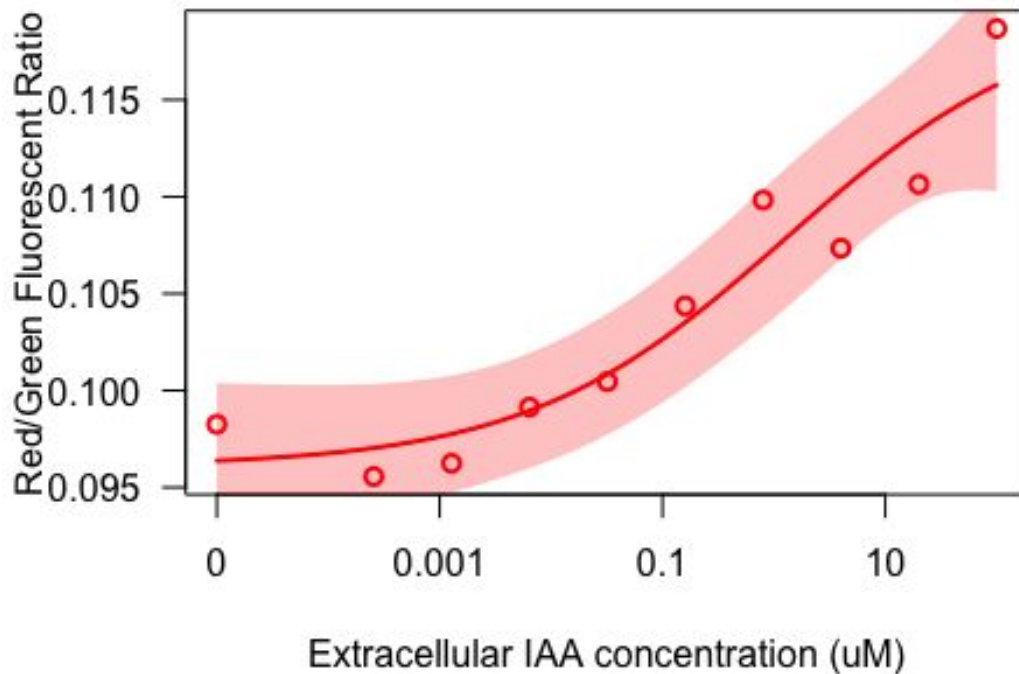

```
print(summary(model.LL4_rep1_209))
# #
# # Model fitted: Log-Logistic (ED50 as parameter) (4 parms)
# #
# # Parameter estimates:
# #
# #           Estimate Std. Error t-value  p-value
# # Slope:(Intercept)  -0.3721096  0.1407488 -2.6438  0.03835 *
# # Lower Limit:(Intercept)  0.0960856  0.0019155 50.1617 4.211e-09 ***
# # Upper Limit:(Intercept)  0.1196734  0.0064435 18.5728 1.572e-06 ***
# # ED50:(Intercept)       1.2919540  2.3836220  0.5420  0.60734
# # ---
# # Signif. codes:  0 '***' 0.001 '**' 0.01 '*' 0.05 '.' 0.1 ' ' 1
# #
# # Residual standard error:
# #
# # 0.002712198 (6 degrees of freedom)

model.LL4_rep2_209 <- drm(YL1.Amean/BL1.Amean ~ dose, data =
subset(dat_sumGp_overlaydata_209,
  replicate == "2"), fct = LL.4(names = c("Slope", "Lower Limit", "Upper
Limit",
```

```

"ED50"))
plot(model.LL4_rep2_209, type = "all", col = "blue", lty = 1, lwd = 2, xlab =
"Extracellular IAA concentration (uM)",
      ylab = "Red/Green Fluorescent Ratio")
plot(model.LL4_rep2_209, broken = TRUE, type = "confidence", col = "blue",
      add = TRUE)

```

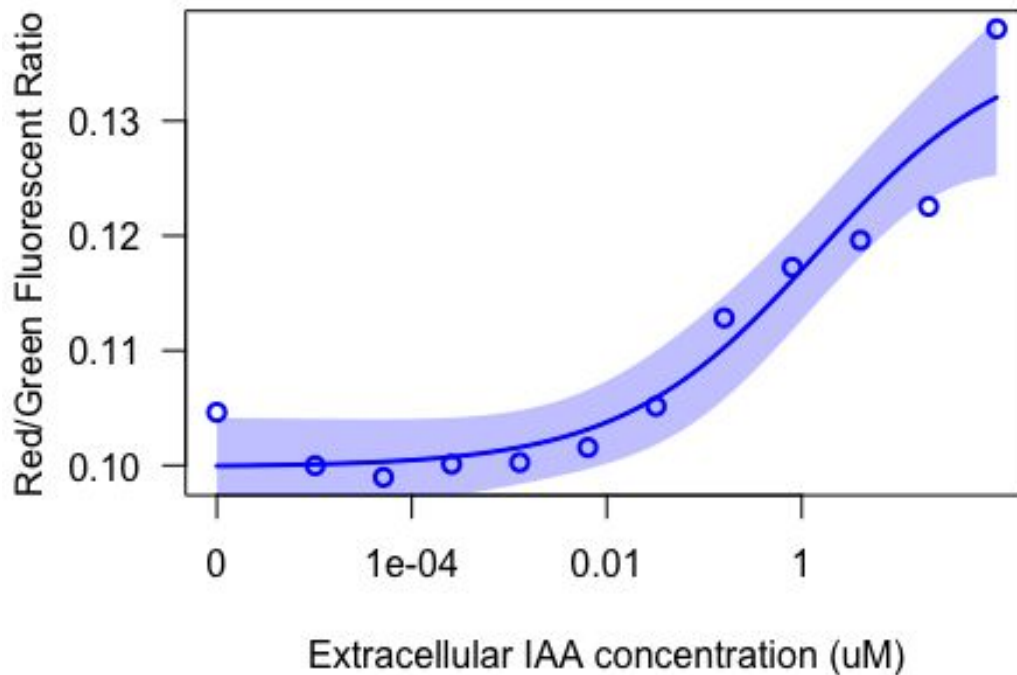

```

print(summary(model.LL4_rep2_209))
##
## Model fitted: Log-Logistic (ED50 as parameter) (4 parms)
##
## Parameter estimates:
##
##           Estimate Std. Error t-value  p-value
## Slope:(Intercept)  -0.4323121  0.1153679 -3.7472  0.005646 **
## Lower Limit:(Intercept)  0.0998826  0.0018914 52.8084 1.833e-11 ***
## Upper Limit:(Intercept)  0.1372100  0.0062312 22.0197 1.910e-08 ***
## ED50:(Intercept)      1.4546642  1.4213107  1.0235  0.336036
## ---
## Signif. codes:  0 '***' 0.001 '**' 0.01 '*' 0.05 '.' 0.1 ' ' 1
##
## Residual standard error:
##

```



```

## 0.003755989 (8 degrees of freedom)

model.LL4_rep3_209 <- drm(YL1.Amean/BL1.Amean ~ dose, data =
subset(dat_sumGp_overlaydata_209,
  replicate == "3"), fct = LL.4(names = c("Slope", "Lower Limit", "Upper
Limit",
  "ED50")))
plot(model.LL4_rep3_209, type = "all", col = "dark green", lty = 1, lwd = 2,
xlab = "Extracellular IAA concentration (uM)",
  ylab = "Red/Green Fluorescent Ratio")
plot(model.LL4_rep3_209, broken = TRUE, type = "confidence", col = "dark
green",
  add = TRUE)

```

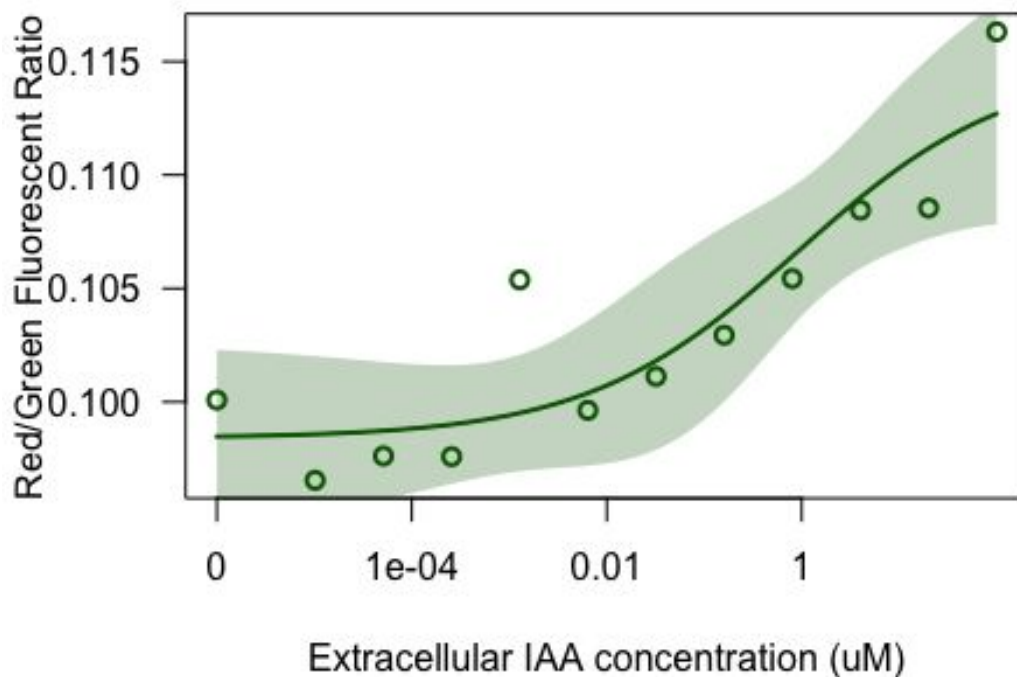

```

print(summary(model.LL4_rep3_209))
##
## Model fitted: Log-logistic (ED50 as parameter) (4 parms)
##
## Parameter estimates:
##
##              Estimate Std. Error t-value  p-value

```

```

## Slope:(Intercept)      -0.4007190  0.2177393 -1.8404    0.1030
## Lower Limit:(Intercept) 0.0984103  0.0018186 54.1128 1.509e-11 ***
## Upper Limit:(Intercept) 0.1148849  0.0037802 30.3916 1.492e-09 ***
## ED50:(Intercept)       0.9199369  1.1883595 0.7741    0.4611
## ---
## Signif. codes:  0 '***' 0.001 '**' 0.01 '*' 0.05 '.' 0.1 ' ' 1
##
## Residual standard error:
##
## 0.002908608 (8 degrees of freedom)

```

```

model.LL4_rep4_209 <- drm(YL1.Amean/BL1.Amean ~ dose, data =
subset(dat_sumGp_overlaydata_209,
replicate == "4"), fct = LL.4(names = c("Slope", "Lower Limit", "Upper
Limit",
"ED50")))
plot(model.LL4_rep4_209, type = "all", col = "dark green", lty = 1, lwd = 2,
xlab = "Extracellular IAA concentration (uM)",
ylab = "Red/Green Fluorescent Ratio")
plot(model.LL4_rep4_209, broken = TRUE, type = "confidence", col = "yellow",
add = TRUE)

```

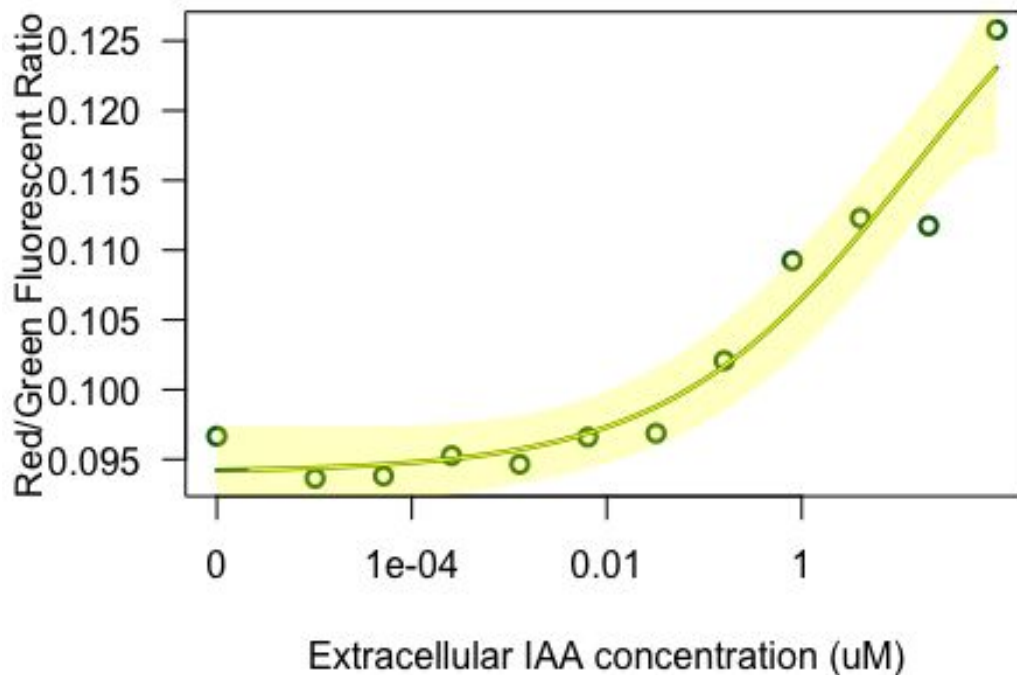

```

print(summary(model.LL4_rep4_209))
# #
# # Model fitted: Log-Logistic (ED50 as parameter) (4 parms)
# #
# # Parameter estimates:
# #
# #           Estimate Std. Error t-value  p-value
# # Slope:(Intercept)   -0.3484214  0.1076460 -3.2367  0.01194 *
# # Lower Limit:(Intercept)  0.0940801  0.0015034 62.5773 4.728e-12 ***
# # Upper Limit:(Intercept)  0.1376317  0.0174428  7.8904 4.822e-05 ***
# # ED50:(Intercept)      13.8165097 33.8084173  0.4087  0.69350
# # ---
# # Signif. codes:  0 '***' 0.001 '**' 0.01 '*' 0.05 '.' 0.1 ' ' 1
# #
# # Residual standard error:
# #
# # 0.002812448 (8 degrees of freedom)

model.LL4_all_209 <- drm(YL1.Amean/BL1.Amean ~ dose, data =
dat_sumGp_overlaydata_209,
  fct = LL.4(names = c("Slope", "Lower Limit", "Upper Limit", "ED50")))
plot(model.LL4_all_209, type = "all", col = "black", lty = 1, lwd = 3)
plot(model.LL4_all_209, broken = TRUE, col = "black", add = TRUE)
plot(model.LL4_all_209, broken = TRUE, type = "confidence", col = "black",
add = TRUE)
print(summary(model.LL4_all_209))
# #
# # Model fitted: Log-Logistic (ED50 as parameter) (4 parms)
# #
# # Parameter estimates:
# #
# #           Estimate Std. Error t-value  p-value
# # Slope:(Intercept)   -0.3420811  0.0895735 -3.8190 0.0004352 ***
# # Lower Limit:(Intercept)  0.0973731  0.0014017 69.4690 < 2.2e-16 ***
# # Upper Limit:(Intercept)  0.1337956  0.0109329 12.2379 1.971e-15 ***
# # ED50:(Intercept)      10.9140480 20.3969607  0.5351 0.5954150
# # ---
# # Signif. codes:  0 '***' 0.001 '**' 0.01 '*' 0.05 '.' 0.1 ' ' 1
# #
# # Residual standard error:
# #
# # 0.004904408 (42 degrees of freedom)

replicate1_209 <- drm(YL1.Amean/BL1.Amean ~ dose, data =
subset(dat_sumGp_overlaydata_209,
  replicate == "1"), fct = LL.4())
replicate2_209 <- drm(YL1.Amean/BL1.Amean ~ dose, data =

```

```

subset(dat_sumGp_overlaydata_209,
  replicate == "2"), fct = LL.4())
replicate3_209 <- drm(YL1.Amean/BL1.Amean ~ dose, data =
subset(dat_sumGp_overlaydata_209,
  replicate == "3"), fct = LL.4())
replicate4_209 <- drm(YL1.Amean/BL1.Amean ~ dose, data =
subset(dat_sumGp_overlaydata_209,
  replicate == "4"), fct = LL.4())

plot(replicate1_209, broken = TRUE, add = TRUE, type = "none", col = "red",
lty = 2)
plot(replicate2_209, broken = TRUE, add = TRUE, type = "none", col = "blue",
lty = 2)
plot(replicate3_209, broken = TRUE, add = TRUE, type = "none", col = "dark
green",
  lty = 2)
plot(replicate4_209, broken = TRUE, add = TRUE, type = "none", col =
"yellow", lty = 2)

```

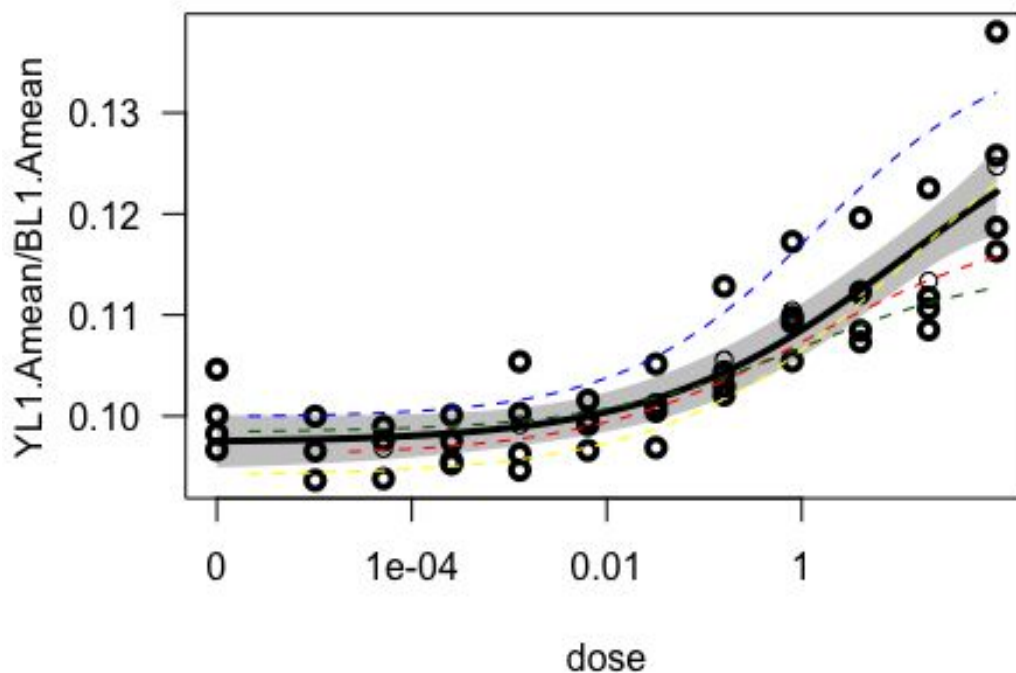

**Figure 6A and 6B: Plot dose-response curve with ggplot**

```

pm210 <- expand.grid(treatment = exp(seq(log(1e-05), log(100), length =

```

```

1000)))
pm210 <- cbind(pm210, predict(model.LL4_all_210, newdata = pm210, interval =
"confidence")) #m2all = model of 210 data

plot210_dose <- ggplot(plate_all_210_sum, aes(x = dose, y =
YL1.Amean/BL1.Amean)) +
  scale_x_log10() + ylab("mScarlet-I/Venus") + xlab("Auxin Treatment ( $\mu$ M)")
+
  scale_x_log10() + scale_color_viridis_c(option = "C") +
geom_point(aes(color = replicate),
  size = 1, alpha = 0.4) + ylim(0.035, 0.12) + theme_classic() +
theme(legend.position = "none",
  axis.title.y = element_text(size = 12, face = "bold"), axis.title.x =
element_text(size = 12,
  face = "bold"), axis.text = element_text(size = 10), legend.title =
element_text(size = 10,
  face = "bold"), legend.text = element_text(size = 10, face = "bold"))
+ geom_ribbon(data = pm210,
  aes(x = treatment, y = Prediction, ymin = Lower, ymax = Upper), alpha =
0.6) +
  geom_line(data = pm210, aes(x = treatment, y = Prediction), size = 1.2) +
ggtitle("AFB2 biosensor") +
  ggeasy::easy_center_title() + ylim(0.03, 0.1) + scale_y_continuous(breaks
= seq(0,
  0.125, 0.025))
## Scale for x is already present.
## Adding another scale for x, which will replace the existing scale.
## Scale for y is already present.
## Adding another scale for y, which will replace the existing scale.
## Scale for y is already present.
## Adding another scale for y, which will replace the existing scale.

plot210_dose

```

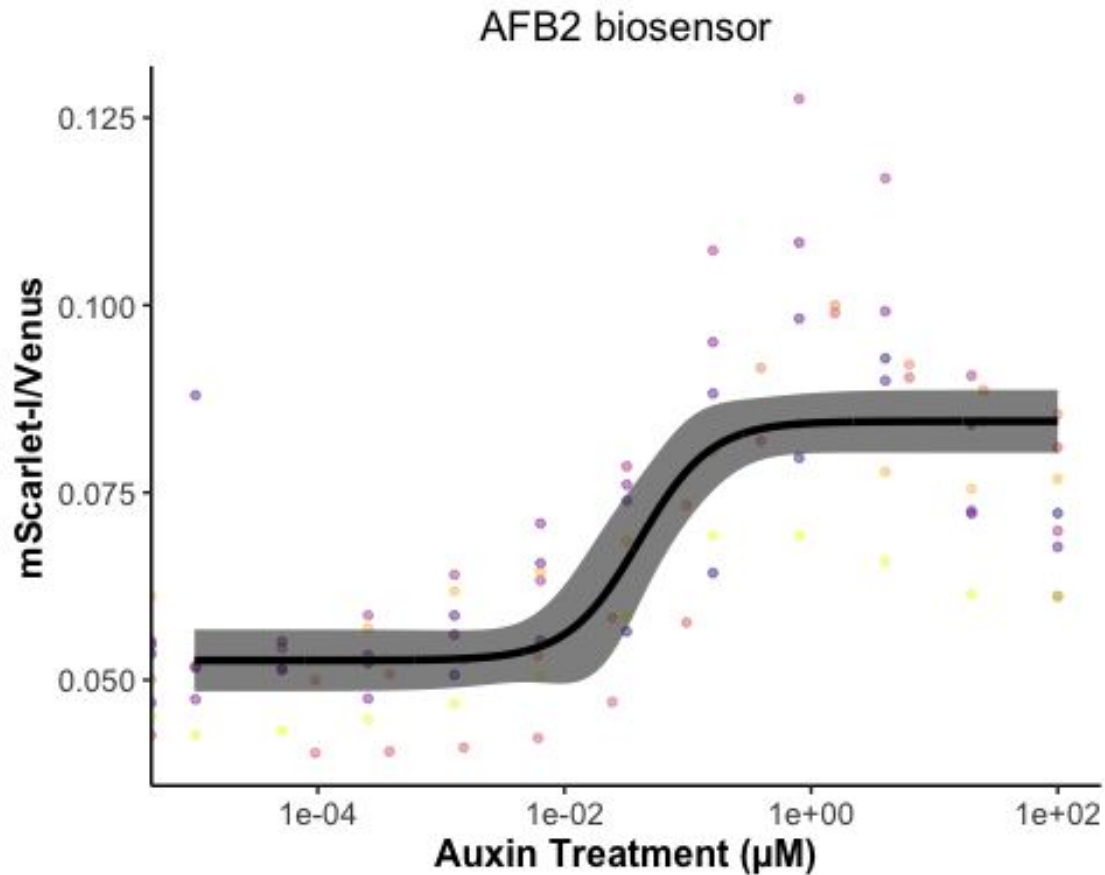

```

pm209 <- expand.grid(treatment = exp(seq(log(1e-05), log(100), length =
1000)))
pm209 <- cbind(pm209, predict(model.LL4_all_209, newdata = pm209, interval =
"confidence"))

plot209_dose <- ggplot(dat_sumGp_overlaydata_209, aes(x = dose, y =
YL1.Amean/BL1.Amean)) +
  scale_x_log10() + ylab("mScarlet-I/Venus") + xlab("Auxin Treatment (µM)")
+
  scale_x_log10() + scale_color_viridis_c(option = "C") +
geom_point(aes(color = replicate),
  size = 1, alpha = 0.4) + theme_classic() + theme(legend.position =
"none", axis.title.y = element_text(size = 12,
  face = "bold"), axis.title.x = element_text(size = 12, face = "bold"),
axis.text = element_text(size = 10),
  legend.title = element_text(size = 10, face = "bold"), legend.text =
element_text(size = 10,
  face = "bold")) + geom_ribbon(data = pm209, aes(x = treatment, y =
Prediction,
  ymin = Lower, ymax = Upper), alpha = 0.6) + geom_line(data = pm209, aes(x

```

```

= treatment,
  y = Prediction), size = 1.2) + ggtitle("TIR1 biosensor") +
ggeasy::easy_center_title() +
  ylim(0.095, 0.125)
## Scale for x is already present.
## Adding another scale for x, which will replace the existing scale.

```

plot209\_dose

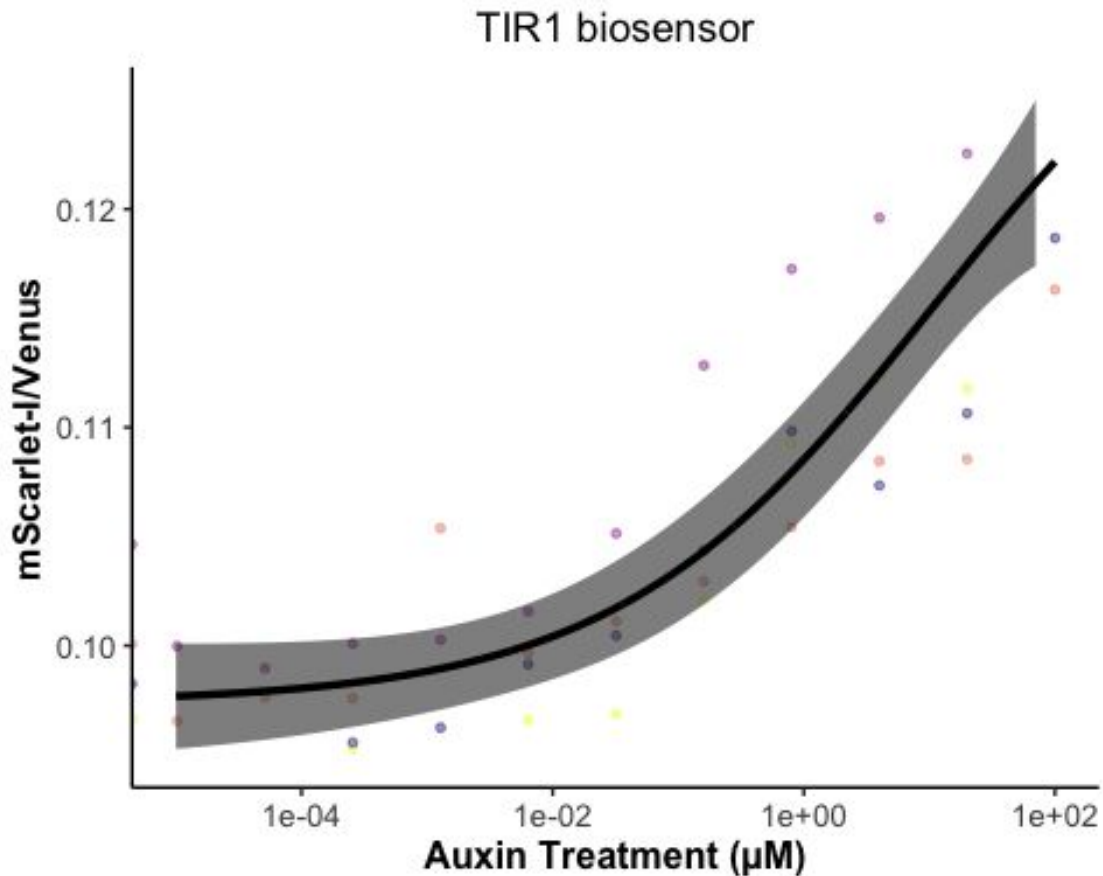

```

## grid.arrange(plot210_dose, plot209_dose, nrow=2, ncol=2)

```

```

DRplots209_210 <- ggarrange(plot210_dose, plot209_dose, nrow = 1, ncol = 2,
  labels = c("A",
    "B"))
DRplots209_210

```

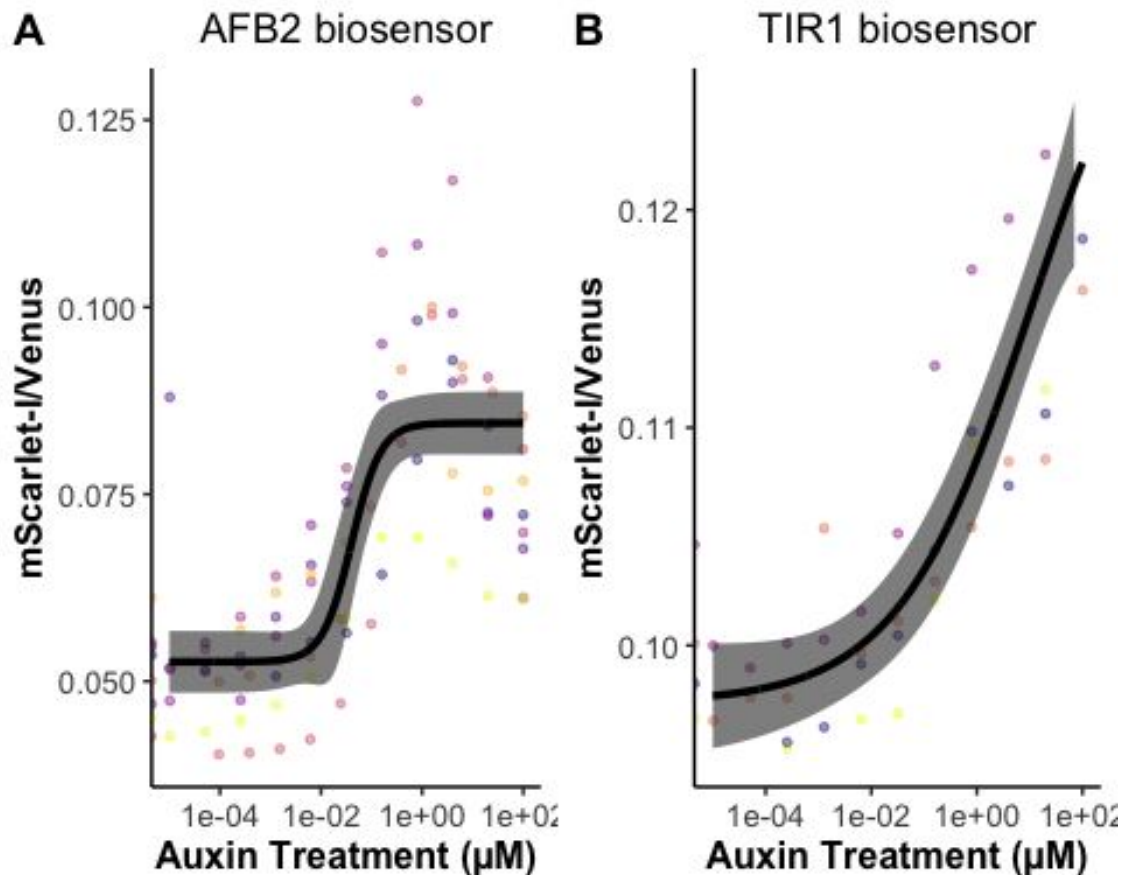

```
# ggsave('DRAPlots209_210.png', width = 8, height = 3)
```

**Figure 5A and Supporting Figure S3: Auxin-induced degradation and time-course assay for the biosensors in cis in multiple yeast strains.**

Two random isolated colonies from each strain were tested on auxin-induced protein degradation assay. IAA working solution was added to obtain the IAA concentration at 50  $\mu\text{M}$  in each culture. The assay was carried out using ThermoFisher flow cytometer.

- yWL185 (TIR1 cis in W303)
- yWL186 (AFB2 cis in W303)
- yWL209 (TIR1 cis in YPH499)
- yWL210 (AFB2 cis in YPH499)

```
plate_03112022 <- read.plateSet(path = "Data for publication/03112022_Time-
course assay/10readings/onlyPatstrains/",
  pattern = "TCA*")
```

```
annotation <- createAnnotation(yourFlowSet = plate_03112022)
write.csv(annotation, "Data for publication/03112022_Time-course
assay/03112022_Time-course assay_10platesPatStrains2.csv")
```



```

annotation <- read.csv("Data for publication/03112022_Time-course
assay/03112022_Time-course assay_10platesPatStrains2.csv")
aplate_03112022 <- annotateFlowSet(yourFlowSet = plate_03112022,
annotation_df = annotation,
mergeBy = "name")
head(rownames(pData(aplate_03112022)))
# # [1] "103112022-Pat-TCA01_Time-course assay_Auxin_yWL185-C1.fcs"
# # [2] "103112022-Pat-TCA01_Time-course assay_Auxin_yWL185-C2.fcs"
# # [3] "103112022-Pat-TCA01_Time-course assay_Auxin_yWL186-C1.fcs"
# # [4] "103112022-Pat-TCA01_Time-course assay_Auxin_yWL186-C2.fcs"
# # [5] "103112022-Pat-TCA01_Time-course assay_Auxin_yWL209-C1.fcs"
# # [6] "103112022-Pat-TCA01_Time-course assay_Auxin_yWL209-C2.fcs"
head(pData(aplate_03112022))
# #
name
# # 103112022-Pat-TCA01_Time-course assay_Auxin_yWL185-C1.fcs 103112022-Pat-
TCA01_Time-course assay_Auxin_yWL185-C1.fcs
# # 103112022-Pat-TCA01_Time-course assay_Auxin_yWL185-C2.fcs 103112022-Pat-
TCA01_Time-course assay_Auxin_yWL185-C2.fcs
# # 103112022-Pat-TCA01_Time-course assay_Auxin_yWL186-C1.fcs 103112022-Pat-
TCA01_Time-course assay_Auxin_yWL186-C1.fcs
# # 103112022-Pat-TCA01_Time-course assay_Auxin_yWL186-C2.fcs 103112022-Pat-
TCA01_Time-course assay_Auxin_yWL186-C2.fcs
# # 103112022-Pat-TCA01_Time-course assay_Auxin_yWL209-C1.fcs 103112022-Pat-
TCA01_Time-course assay_Auxin_yWL209-C1.fcs
# # 103112022-Pat-TCA01_Time-course assay_Auxin_yWL209-C2.fcs 103112022-Pat-
TCA01_Time-course assay_Auxin_yWL209-C2.fcs
# #
# # folder X strain
# # 103112022-Pat-TCA01_Time-course assay_Auxin_yWL185-C1.fcs TCA01 1 yWL185
# # 103112022-Pat-TCA01_Time-course assay_Auxin_yWL185-C2.fcs TCA01 2 yWL185
# # 103112022-Pat-TCA01_Time-course assay_Auxin_yWL186-C1.fcs TCA01 3 yWL186
# # 103112022-Pat-TCA01_Time-course assay_Auxin_yWL186-C2.fcs TCA01 4 yWL186
# # 103112022-Pat-TCA01_Time-course assay_Auxin_yWL209-C1.fcs TCA01 5 yWL209
# # 103112022-Pat-TCA01_Time-course assay_Auxin_yWL209-C2.fcs TCA01 6 yWL209
# #
# # treatment
colony
# # 103112022-Pat-TCA01_Time-course assay_Auxin_yWL185-C1.fcs 50 uM Auxin
1
# # 103112022-Pat-TCA01_Time-course assay_Auxin_yWL185-C2.fcs 50 uM Auxin
2
# # 103112022-Pat-TCA01_Time-course assay_Auxin_yWL186-C1.fcs 50 uM Auxin
1
# # 103112022-Pat-TCA01_Time-course assay_Auxin_yWL186-C2.fcs 50 uM Auxin
2
# # 103112022-Pat-TCA01_Time-course assay_Auxin_yWL209-C1.fcs 50 uM Auxin
1
# # 103112022-Pat-TCA01_Time-course assay_Auxin_yWL209-C2.fcs 50 uM Auxin
2
# #
# # design yeast
# # 103112022-Pat-TCA01_Time-course assay_Auxin_yWL185-C1.fcs TIR1 cis W303

```

```

## 103112022-Pat-TCA01_Time-course assay_Auxin_yWL185-C2.fcs TIR1 cis W303
## 103112022-Pat-TCA01_Time-course assay_Auxin_yWL186-C1.fcs AFB2 cis W303
## 103112022-Pat-TCA01_Time-course assay_Auxin_yWL186-C2.fcs AFB2 cis W303
## 103112022-Pat-TCA01_Time-course assay_Auxin_yWL209-C1.fcs TIR1 cis YPH499
## 103112022-Pat-TCA01_Time-course assay_Auxin_yWL209-C2.fcs TIR1 cis YPH499
##
design_yeast
## 103112022-Pat-TCA01_Time-course assay_Auxin_yWL185-C1.fcs TIR1 dual-
fusion (W303)
## 103112022-Pat-TCA01_Time-course assay_Auxin_yWL185-C2.fcs TIR1 dual-
fusion (W303)
## 103112022-Pat-TCA01_Time-course assay_Auxin_yWL186-C1.fcs AFB2 dual-
fusion (W303)
## 103112022-Pat-TCA01_Time-course assay_Auxin_yWL186-C2.fcs AFB2 dual-
fusion (W303)
## 103112022-Pat-TCA01_Time-course assay_Auxin_yWL209-C1.fcs TIR1 dual-
fusion (YPH499)
## 103112022-Pat-TCA01_Time-course assay_Auxin_yWL209-C2.fcs TIR1 dual-
fusion (YPH499)
##
## before_after
reading
## 103112022-Pat-TCA01_Time-course assay_Auxin_yWL185-C1.fcs before
1
## 103112022-Pat-TCA01_Time-course assay_Auxin_yWL185-C2.fcs before
1
## 103112022-Pat-TCA01_Time-course assay_Auxin_yWL186-C1.fcs before
1
## 103112022-Pat-TCA01_Time-course assay_Auxin_yWL186-C2.fcs before
1
## 103112022-Pat-TCA01_Time-course assay_Auxin_yWL209-C1.fcs before
1
## 103112022-Pat-TCA01_Time-course assay_Auxin_yWL209-C2.fcs before
1
##
## data_selected
## 103112022-Pat-TCA01_Time-course assay_Auxin_yWL185-C1.fcs no
## 103112022-Pat-TCA01_Time-course assay_Auxin_yWL185-C2.fcs no
## 103112022-Pat-TCA01_Time-course assay_Auxin_yWL186-C1.fcs no
## 103112022-Pat-TCA01_Time-course assay_Auxin_yWL186-C2.fcs no
## 103112022-Pat-TCA01_Time-course assay_Auxin_yWL209-C1.fcs no
## 103112022-Pat-TCA01_Time-course assay_Auxin_yWL209-C2.fcs no

plate_03112022_sum <- summarizeFlow(plate_03112022, channel = c("BL1.A",
"YL1.A"),
  gated = TRUE)
## [1] "Summarizing all events..."

plate_03112022_sum$treatment <- factor(plate_03112022_sum$treatment, levels =
c("Control",
"50 uM Auxin"))

```

```

plate_03112022_sum <- plate_03112022_sum %>%
  mutate(background_p = case_when(strain %in% c("yWL185", "yWL186") ~
"W303", strain %in%
  c("yWL209", "yWL210") ~ "YPH499"), receptor_p = case_when(strain %in%
c("yWL185",
  "yWL209") ~ "TIR1", strain %in% c("yWL186", "yWL210") ~ "AFB2"))

# The time auxin addition is equal to time zero
time0 <- "303112022-Pat-TCA03_Time-course assay_Auxin_yWL185-C1.fcs"
# or whatever well was being read when auxin was added

plate_03112022_sum$time <- plate_03112022_sum$btime -
plate_03112022_sum[[which(plate_03112022_sum$name ==
  time0), "btime"]]
# single bracket -->extracting the all name, 2 brackets extract just single
# 'value' or 'values'

# To normalize data

plate_03112022_sum <- plate_03112022_sum %>%
  mutate(ratio = BL1.Amean/YL1.Amean) %>%
  group_by(background_p, receptor_p) %>%
  mutate(normalizedratio = ratio/mean(ratio))

unnorm_ratio <- ggplot(plate_03112022_sum, aes(x = time, y =
BL1.Amean/YL1.Amean,
  group = interaction(factor(colony), factor(treatment)), color =
treatment)) +
  geom_line(aes(color = treatment), size = 1.5) + geom_point(aes(color =
treatment),
  size = 2.5) + scale_color_manual(values = c("#b8627db2", "#6b4596b2")) +
scale_fill_manual(values = c("#b8627db2",
  "#6b4596b2")) + xlab("Time post treatment (min)") + ylab("Venus/mScarlet-
I") +
  facet_grid(receptor_p ~ background_p) + theme_classic() +
theme(legend.position = "bottom",
  axis.title.y = element_text(size = 12, face = "bold"), axis.title.x =
element_text(size = 12,
  face = "bold"), axis.text = element_text(size = 10), legend.title =
element_text(size = 10,
  face = "bold"), legend.text = element_text(size = 10))
unnorm_ratio

```

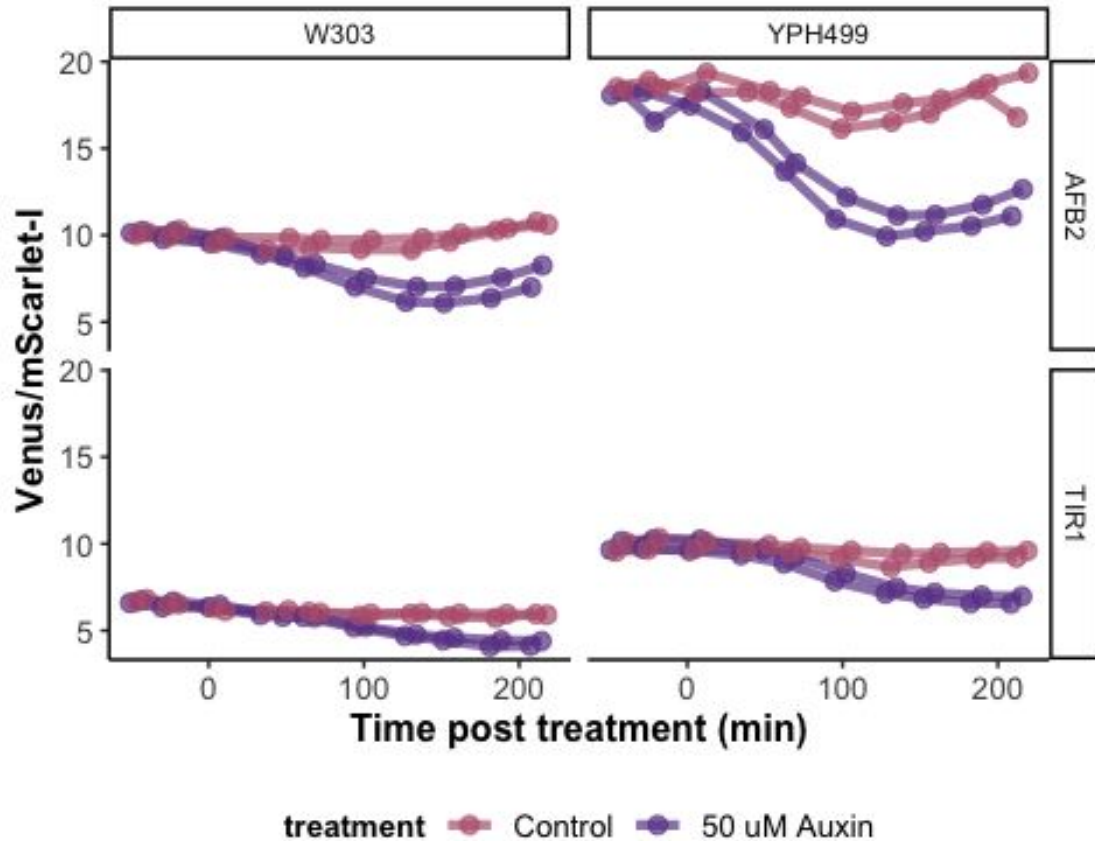

```
# ggsave('unnorm_ratio.png', width = 4, height = 3.5)

norm_ratio <- ggplot(plate_03112022_sum, aes(x = time, y = normalizedratio,
group = interaction(factor(colony),
  factor(treatment)), color = treatment)) + geom_line(aes(color =
treatment), size = 1.5,
  alpha = 0.7) + geom_point(aes(color = treatment), size = 2.5) +
scale_color_manual(values = c("#b8627dff",
  "#6b4596ff")) + scale_fill_manual(values = c("#b8627dff", "#6b4596ff")) +
xlab("Time post treatment (min)") +
  ylab("Normalized Venus/mScarlet-I") + facet_grid(receptor_p ~
background_p) +
  theme_classic() + theme(legend.position = "bottom", axis.title.y =
element_text(size = 12,
  face = "bold"), axis.title.x = element_text(size = 12, face = "bold"),
axis.text = element_text(size = 10),
  legend.title = element_text(size = 10, face = "bold"), legend.text =
element_text(size = 10)) +
  labs(color = "Treatment")
```

norm\_ratio

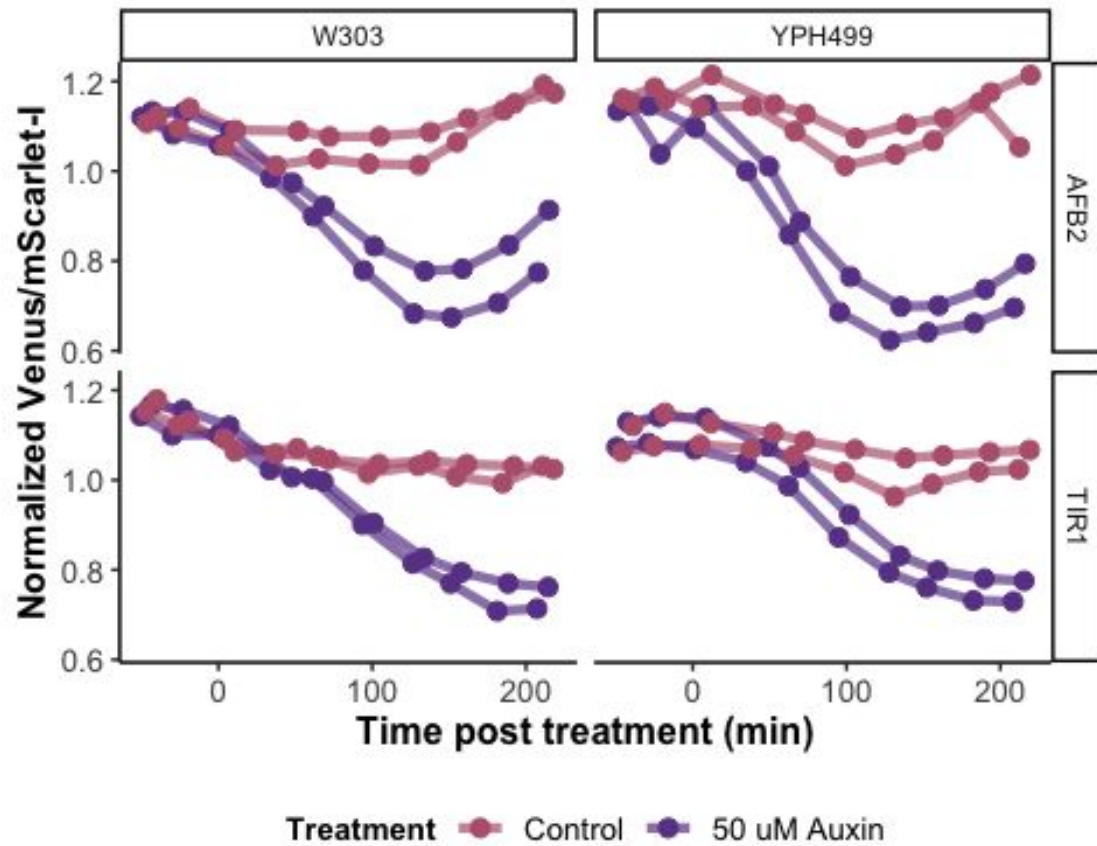

```
# ggsave('norm_ratio.png', width = 4, height = 3.5)
```

```
timecourse_plot1 <- ggarrange(unnorm_ratio, norm_ratio, nrow = 1, ncol = 2,  
widths = c(1,  
1), labels = c("A", "B"), common.legend = TRUE)
```

```
timecourse_plot1
```

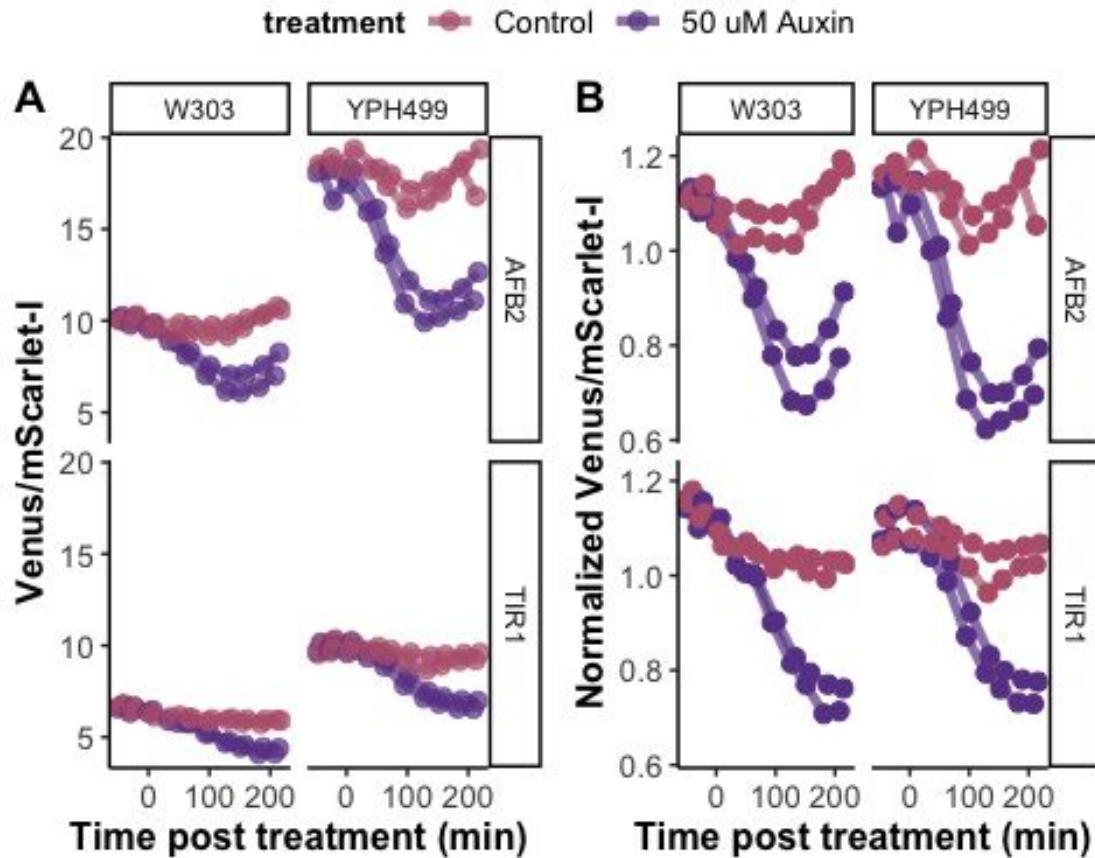

```
# ggsave('timecourse_plot1.png', width = 8, height = 4)
# ggsave('Supplement2.png', width = 8, height = 4)
```

### Supporting Figure S2: CV plots

```
plate_03112022 <- read.plateSet(path = "Data for publication/03112022_Time-
course assay/10readings/onlyPatstrains/",
  pattern = "TCA*")

annotation <- createAnnotation(yourFlowSet = plate_03112022)
write.csv(annotation, "/Users/patchaisupa/Google Drive/Shared
drives/PlantSynBioLab/Pat/Experiments/Time course assays/03112022_Time-course
assay/03112022_Time-course assay_10platesPatStrains2.csv")

annotation <- read.csv("Data for publication/03112022_Time-course
assay/03112022_Time-course assay_10platesPatStrains2.csv")
aplate_03112022 <- annotateFlowSet(yourFlowSet = plate_03112022,
  annotation_df = annotation,
  mergeBy = "name")
head(rownames(pData(aplate_03112022)))
## [1] "103112022-Pat-TCA01_Time-course assay_Auxin_yWL185-C1.fcs"
## [2] "103112022-Pat-TCA01_Time-course assay_Auxin_yWL185-C2.fcs"
## [3] "103112022-Pat-TCA01_Time-course assay_Auxin_yWL186-C1.fcs"
```



```

# # 103112022-Pat-TCA01_Time-course assay_Auxin_yWL185-C2.fcs TIR1 dual-
fusion (W303)
# # 103112022-Pat-TCA01_Time-course assay_Auxin_yWL186-C1.fcs AFB2 dual-
fusion (W303)
# # 103112022-Pat-TCA01_Time-course assay_Auxin_yWL186-C2.fcs AFB2 dual-
fusion (W303)
# # 103112022-Pat-TCA01_Time-course assay_Auxin_yWL209-C1.fcs TIR1 dual-
fusion (YPH499)
# # 103112022-Pat-TCA01_Time-course assay_Auxin_yWL209-C2.fcs TIR1 dual-
fusion (YPH499)
# #
# # before_after
reading
# # 103112022-Pat-TCA01_Time-course assay_Auxin_yWL185-C1.fcs before
1
# # 103112022-Pat-TCA01_Time-course assay_Auxin_yWL185-C2.fcs before
1
# # 103112022-Pat-TCA01_Time-course assay_Auxin_yWL186-C1.fcs before
1
# # 103112022-Pat-TCA01_Time-course assay_Auxin_yWL186-C2.fcs before
1
# # 103112022-Pat-TCA01_Time-course assay_Auxin_yWL209-C1.fcs before
1
# # 103112022-Pat-TCA01_Time-course assay_Auxin_yWL209-C2.fcs before
1
# #
# # data_selected
# # 103112022-Pat-TCA01_Time-course assay_Auxin_yWL185-C1.fcs no
# # 103112022-Pat-TCA01_Time-course assay_Auxin_yWL185-C2.fcs no
# # 103112022-Pat-TCA01_Time-course assay_Auxin_yWL186-C1.fcs no
# # 103112022-Pat-TCA01_Time-course assay_Auxin_yWL186-C2.fcs no
# # 103112022-Pat-TCA01_Time-course assay_Auxin_yWL209-C1.fcs no
# # 103112022-Pat-TCA01_Time-course assay_Auxin_yWL209-C2.fcs no

plate_03112022_sum <- summarizeFlow(aplate_03112022, channel = c("BL1.A",
"YL1.A"),
gated = TRUE)
# # [1] "Summarizing all events..."

# The time auxin addition is equal to time zero
time0 <- "303112022-Pat-TCA03_Time-course assay_Auxin_yWL185-C1.fcs"
# or whatever well was being read when auxin was added

plate_03112022_sum$time <- plate_03112022_sum$btime -
plate_03112022_sum[[which(plate_03112022_sum$name ==
time0), "btime"]]
# single bracket -->extracting the all name, 2 brackets extract just single
# 'value' or 'values'

```



```

plate_03112022_sum <- plate_03112022_sum %>%
  mutate(background_p = case_when(strain %in% c("yWL185", "yWL186") ~
    "W303", strain %in%
      c("yWL209", "yWL210") ~ "YPH499"), receptor_p = case_when(strain %in%
c("yWL185",
  "yWL209") ~ "TIR1", strain %in% c("yWL186", "yWL210") ~ "AFB2"))

```

#### Supporting Figure S2A: yWL185 (TIR1 in cis, W303 yeast)

```

data185 <- steadyState(plate_03112022, gated = TRUE)
## [1] "No further gating applied."
## [1] "Converting events..."
data185 <- subset(data185, strain == "yWL185" & name %in% c("803112022-Pat-
TCA08_Time-course assay_Auxin_yWL185-C1.fcs",
  "803112022-Pat-TCA08_Time-course assay_Control_yWL185-C1.fcs"))

cv <- function(x) return(round(sd(x)/mean(x), 2))

data185 <- subset(data185, BL1.A > 1 & YL1.A > 1)
data185$FLratio <- data185$BL1.A/data185$YL1.A
range(data185$BL1.A)
## [1] 45 1048575
cv <- function(x) return(round(sd(x)/mean(x), 2))

data185$Venus <- data185$BL1.A/median(data185$BL1.A)
data185$mScarlet <- data185$YL1.A/median(data185$YL1.A)
data185$FLratio <- data185$BL1.A/data185$YL1.A
data185$ratio <- data185$FLratio/median(data185$FLratio)

data_long185 <- data185 %>%
  dplyr::select(treatment, Venus, mScarlet, ratio, strain) %>%
  pivot_longer(cols = c(Venus, mScarlet, ratio), names_to = "parameter",
values_to = "value") %>%
  dplyr::mutate(parameter = fct_relevel(parameter, "Venus"))

# need to also format CVs appropriately for annotating

CV185 <- data185 %>%
  group_by(treatment) %>%
  dplyr::summarise(across(dplyr::where(is_double), cv)) %>%
  dplyr::select(treatment, Venus, mScarlet, ratio) %>%
  pivot_longer(cols = c(Venus, mScarlet, ratio), names_to = "parameter",
values_to = "value")

plot185 <- ggplot(data = data_long185, mapping = aes(x = value, color =
treatment)) +

```

```

    geom_density() + xlim(c(-1, 4)) + labs(x = "median normalized intensity",
color = "treatment") +
    theme_test() + geom_text(data = subset(CV185, treatment == "50 uM
Auxin"), aes(label = paste0("CV = ",
value)), x = 2, y = 1) + geom_text(data = subset(CV185, treatment ==
"Control"),
aes(label = paste0("CV = ", value)), x = 0, y = 1) +
scale_color_viridis_d(option = "D",
end = 0.75, direction = -1)

venus185 <- ggplot(data185, aes(x = data185$Venus, group = treatment, fill =
treatment,
color = treatment)) + geom_density(adjust = 1.5, alpha = 0.5) + labs(x =
"Venus",
y = "Density") + xlim(-0.1, 2) + ylim(0, 2) + theme_classic() +
theme(legend.position = "none") +
geom_text(data = subset(CV185, parameter == "Venus" & treatment == "50 uM
Auxin"),
aes(label = paste0("CV = ", value)), x = 1.2, y = 1.1) +
geom_text(data = subset(CV185,
parameter == "Venus" & treatment == "Control"), aes(label = paste0("CV =
", value)),
x = 0.55, y = 1.5) + scale_color_manual(values = c("#f7cb44b2",
"#566573")) +
scale_fill_manual(values = c("#f7cb44b2", "#566573"))
venus185

```

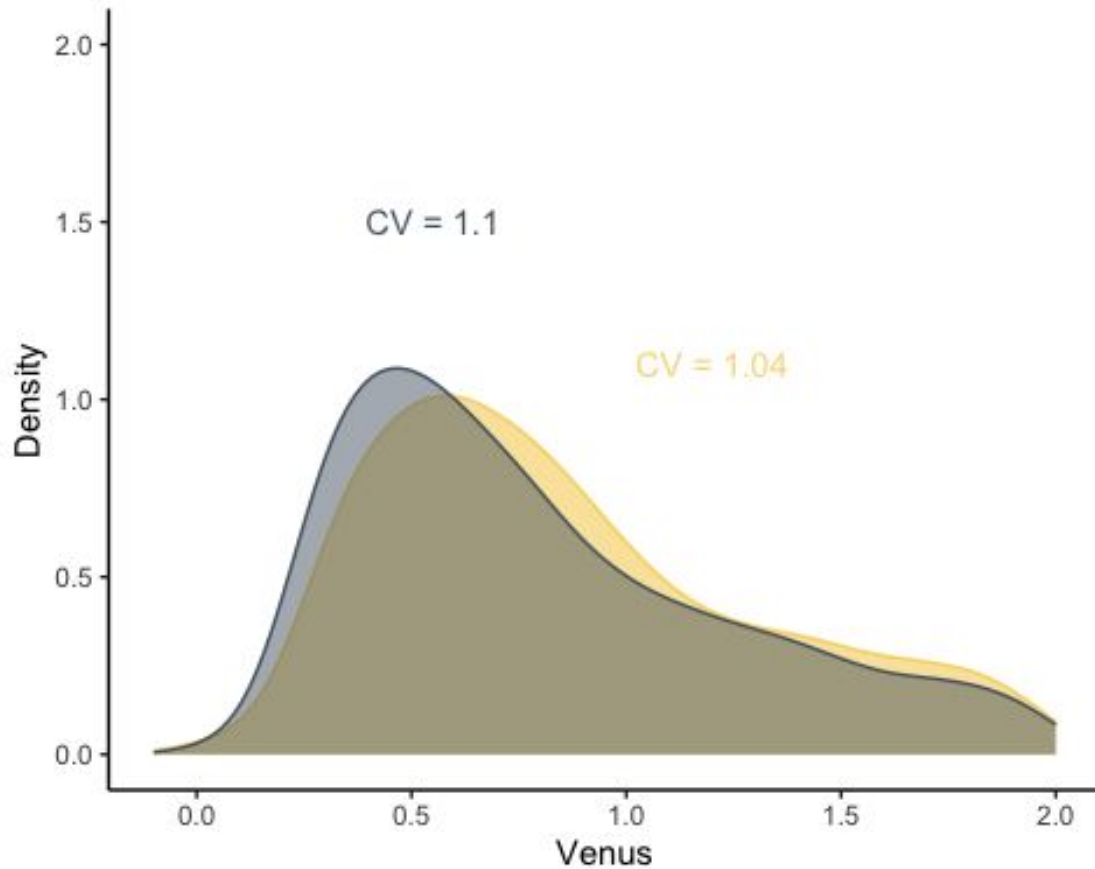

```
red185 <- ggplot(data185, aes(x = data185$mScarlet, group = treatment, fill =
treatment,
  color = treatment)) + geom_density(adjust = 1.5, alpha = 0.5) + labs(x =
"mScarlet",
  y = "Density") + xlim(-0.1, 2) + ylim(0, 2) + theme_classic() +
theme(legend.position = "none") +
  geom_text(data = subset(CV185, parameter == "mScarlet" & treatment == "50
uM Auxin"),
    aes(label = paste0("CV = ", value)), x = 1.2, y = 1.1) +
geom_text(data = subset(CV185,
  parameter == "mScarlet" & treatment == "Control"), aes(label = paste0("CV
= ",
  value)), x = 0.55, y = 1.5) + scale_color_manual(values = c("#de7065b2",
"#566573")) +
  scale_fill_manual(values = c("#de7065b2", "#566573"))
red185
```

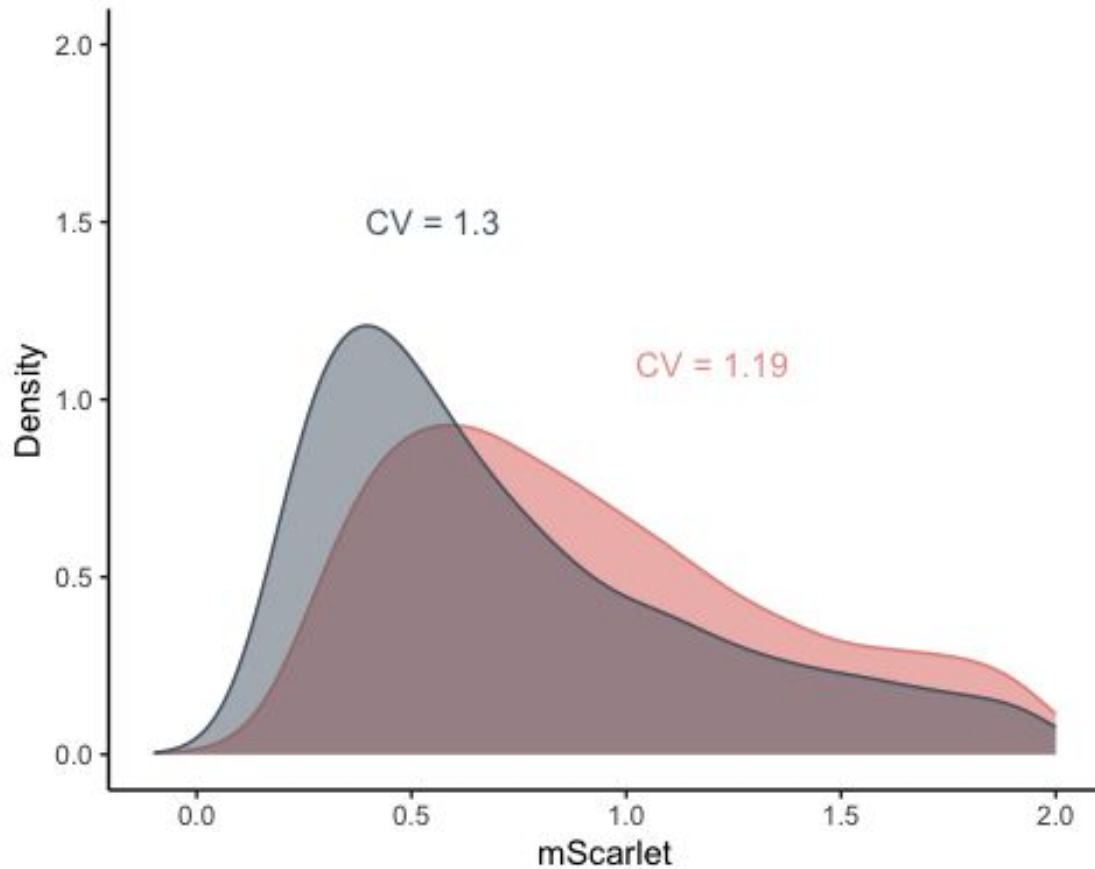

```
ratio185 <- ggplot(data185, aes(x = data185$ratio, group = treatment, fill =
treatment,
  color = treatment)) + geom_density(adjust = 1.5, alpha = 0.5) + labs(x =
"Venus/mScarlet ratio",
  y = "Density") + xlim(-0.1, 2) + ylim(0, 3.5) + theme_classic() +
theme(legend.position = "none") +
  geom_text(data = subset(CV185, parameter == "ratio" & treatment == "50 uM
Auxin"),
    aes(label = paste0("CV = ", value)), x = 0.4, y = 2) + geom_text(data
= subset(CV185,
  parameter == "ratio" & treatment == "Control"), aes(label = paste0("CV =
", value)),
  x = 1.6, y = 2) + scale_color_manual(values = c("#593d9cb2", "#566573"))
+ scale_fill_manual(values = c("#593d9cb2",
  "#566573"))
```

```
ratio185
```

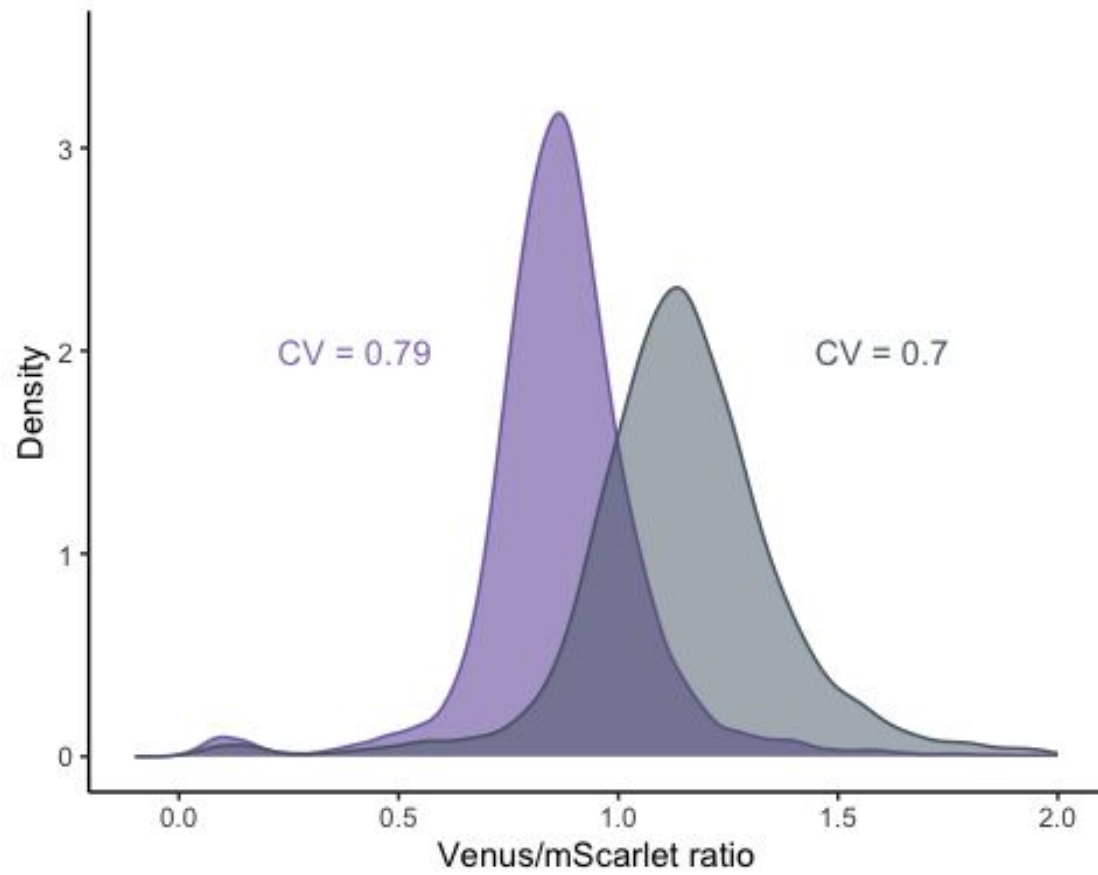

```
plot185 <- grid.arrange(venus185, red185, ratio185, nrow = 3, ncol = 1)
```

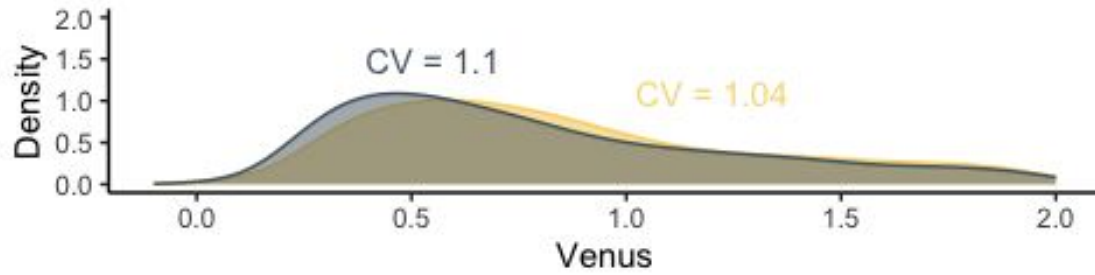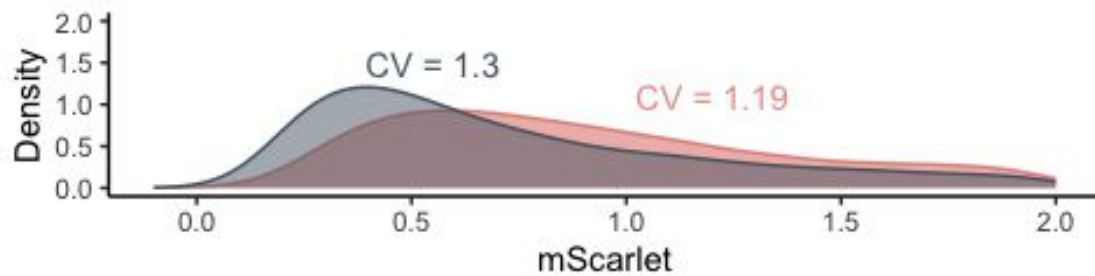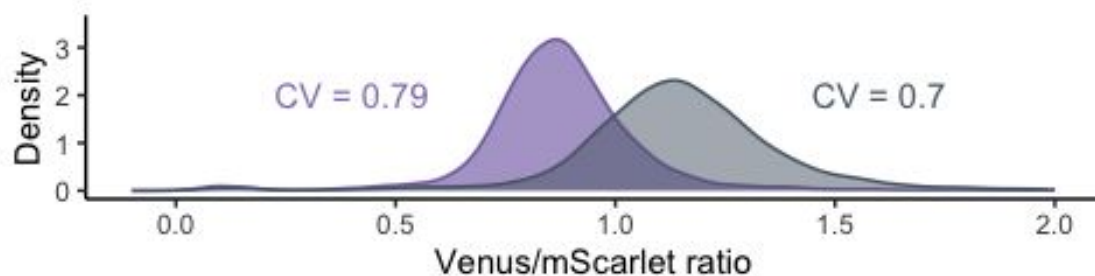

```

plot185
## TableGrob (3 x 1) "arrange": 3 grobs
## z      cells      name      grob
## 1 1 (1-1,1-1) arrange gtable[layout]
## 2 2 (2-2,1-1) arrange gtable[layout]
## 3 3 (3-3,1-1) arrange gtable[layout]

plot185_all <- venus185/red185/ratio185 + plot_annotation(title = "TIR1 dual-
fusion (W303)") &
  theme(plot.title = element_text(hjust = 0.5))
plot185_all

```

## TIR1 dual-fusion (W303)

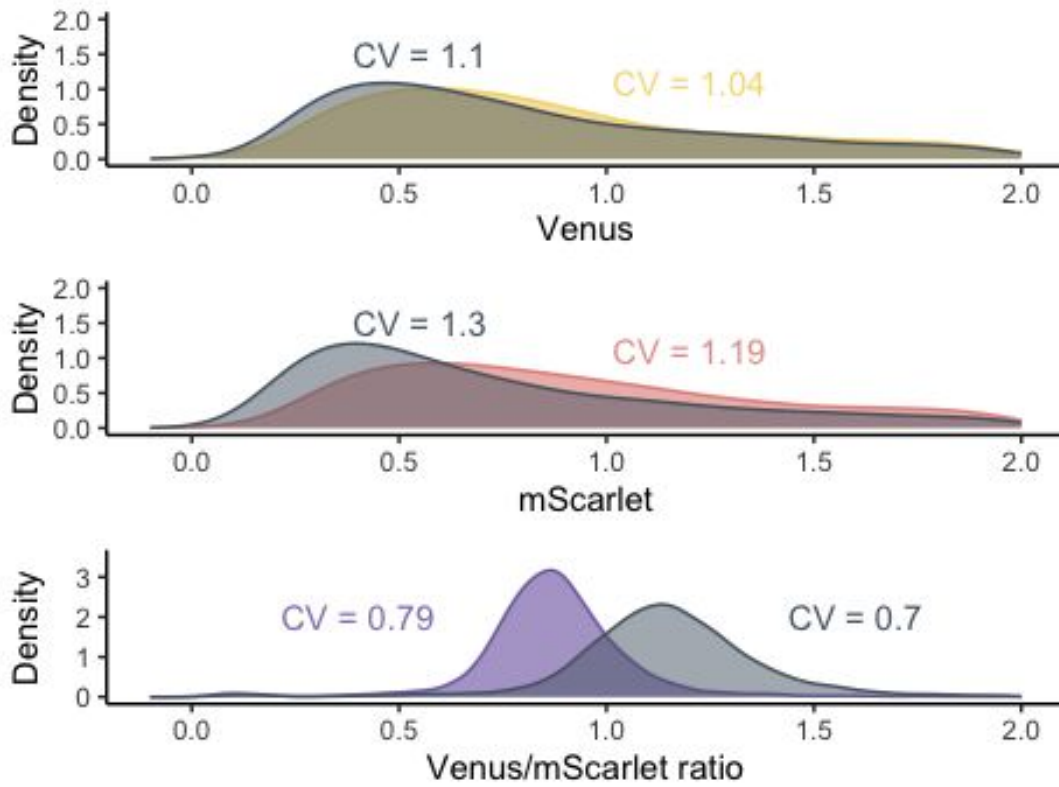

```
# ggsave('plot185_all.png', width = 6, height = 5)
```

### Supporting Figure S2B: yWL186 (AFB2 in cis, W303 yeast)

```
data186 <- steadyState(plate_03112022, gated = TRUE)
## [1] "No further gating applied."
## [1] "Converting events..."
data186 <- subset(data186, strain == "yWL186" & name %in% c("803112022-Pat-
TCA08_Time-course assay_Auxin_yWL186-C1.fcs",
"803112022-Pat-TCA08_Time-course assay_Control_yWL186-C1.fcs"))

cv <- function(x) return(round(sd(x)/mean(x), 2))

data186 <- subset(data186, BL1.A > 1 & YL1.A > 1)
data186$FLratio <- data186$BL1.A/data186$YL1.A
range(data186$BL1.A)
## [1] 25 1048575
cv <- function(x) return(round(sd(x)/mean(x), 2))

data186$Venus <- data186$BL1.A/median(data186$BL1.A)
data186$mScarlet <- data186$YL1.A/median(data186$YL1.A)
data186$FLratio <- data186$BL1.A/data186$YL1.A
```

```

data186$ratio <- data186$FLratio/median(data186$FLratio)

data_long186 <- data186 %>%
  dplyr::select(treatment, Venus, mScarlet, ratio, strain) %>%
  pivot_longer(cols = c(Venus, mScarlet, ratio), names_to = "parameter",
values_to = "value") %>%
  dplyr::mutate(parameter = fct_relevel(parameter, "Venus"))

# need to also format CVs appropriately for annotating

CV186 <- data186 %>%
  group_by(treatment) %>%
  dplyr::summarise(across(dplyr::where(is_double), cv)) %>%
  dplyr::select(treatment, Venus, mScarlet, ratio) %>%
  pivot_longer(cols = c(Venus, mScarlet, ratio), names_to = "parameter",
values_to = "value")

plot186 <- ggplot(data = data_long186, mapping = aes(x = value, color =
treatment)) +
  geom_density() + xlim(c(-1, 4)) + labs(x = "median normalized intensity",
color = "treatment") +
  theme_test() + geom_text(data = subset(CV186, treatment == "50 uM
Auxin"), aes(label = paste0("CV = ",
value))), x = 2, y = 1) + geom_text(data = subset(CV186, treatment ==
"Control"),
aes(label = paste0("CV = ", value)), x = 0, y = 1) +
scale_color_viridis_d(option = "D",
end = 0.75, direction = -1)

venus186 <- ggplot(data186, aes(x = data186$Venus, group = treatment, fill =
treatment,
color = treatment)) + geom_density(adjust = 1.5, alpha = 0.5) + labs(x =
"Venus (normalized median)",
y = "Density") + xlim(0, 2) + ylim(0, 2) + theme_classic() +
theme(legend.position = "none") +
geom_text(data = subset(CV186, parameter == "Venus" & treatment == "50 uM
Auxin"),
aes(label = paste0("CV = ", value)), x = 1.2, y = 1.1) +
geom_text(data = subset(CV186,
parameter == "Venus" & treatment == "Control"), aes(label = paste0("CV =
", value)),
x = 0.55, y = 1.5) + scale_color_manual(values = c("#f7cb44b2",
"#566573")) +
scale_fill_manual(values = c("#f7cb44b2", "#566573"))

red186 <- ggplot(data186, aes(x = data186$mScarlet, group = treatment, fill =

```



```

treatment,
  color = treatment)) + geom_density(adjust = 1.5, alpha = 0.5) + labs(x =
"mScarlet (normalized median)",
  y = "Density") + xlim(0, 2) + ylim(0, 2) + theme_classic() +
theme(legend.position = "none") +
  geom_text(data = subset(CV186, parameter == "mScarlet" & treatment == "50
uM Auxin"),
    aes(label = paste0("CV = ", value)), x = 1.2, y = 1.1) +
geom_text(data = subset(CV186,
  parameter == "mScarlet" & treatment == "Control"), aes(label = paste0("CV
= ",
  value)), x = 0.55, y = 1.5) + scale_color_manual(values = c("#de7065b2",
"#566573")) +
  scale_fill_manual(values = c("#de7065b2", "#566573"))

ratio186 <- ggplot(data186, aes(x = data186$ratio, group = treatment, fill =
treatment,
  color = treatment)) + geom_density(adjust = 1.5, alpha = 0.5) + labs(x =
"Venus/mScarlet ratio",
  y = "Density") + xlim(0, 2) + ylim(0, 3.5) + theme_classic() +
theme(legend.position = "none") +
  geom_text(data = subset(CV186, parameter == "ratio" & treatment == "50 uM
Auxin"),
    aes(label = paste0("CV = ", value)), x = 0.2, y = 2) + geom_text(data
= subset(CV186,
  parameter == "ratio" & treatment == "Control"), aes(label = paste0("CV =
", value)),
  x = 1.3, y = 2) + scale_color_manual(values = c("#593d9cb2", "#566573"))
+ scale_fill_manual(values = c("#593d9cb2",
"#566573"))

plot186 <- grid.arrange(venus186, red186, ratio186, nrow = 3, ncol = 1)

```

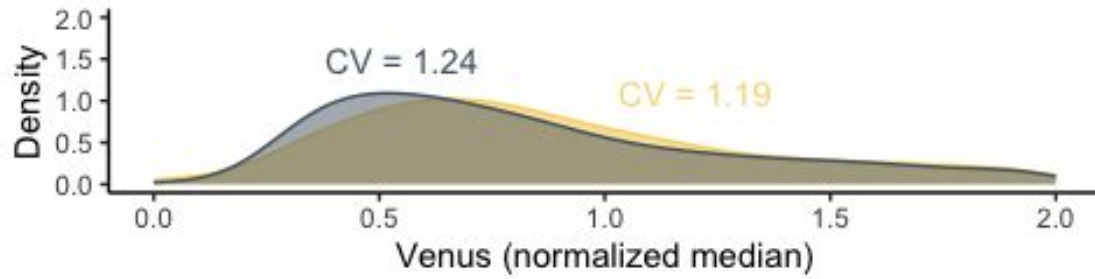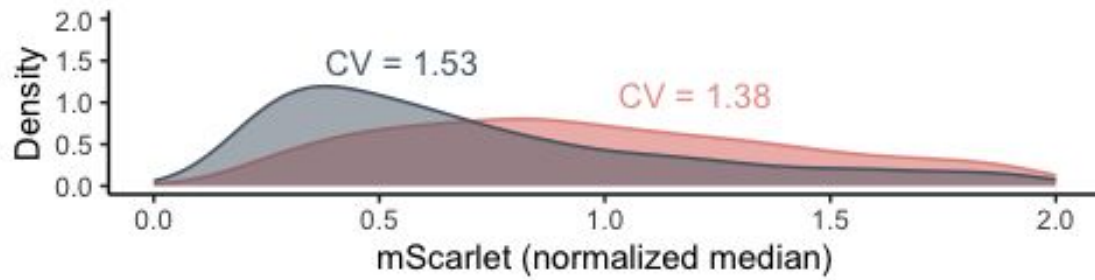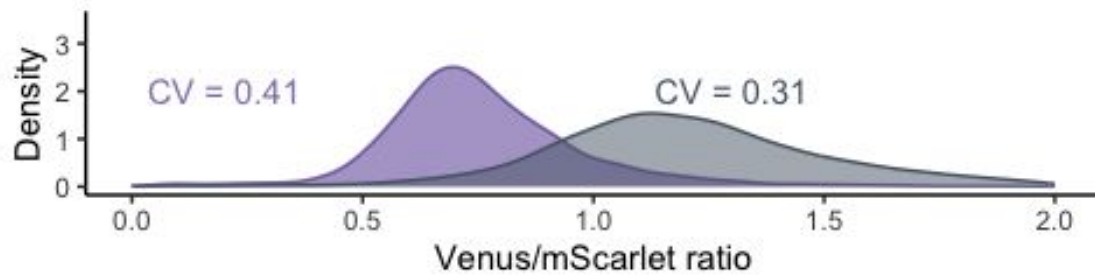

```

plot186
# # TableGrob (3 x 1) "arrange": 3 grobs
# #   z      cells      name      grob
# # 1 1 (1-1,1-1) arrange gtable[layout]
# # 2 2 (2-2,1-1) arrange gtable[layout]
# # 3 3 (3-3,1-1) arrange gtable[layout]

plot186_all <- venus186/red186/ratio186 + plot_annotation(title = "AFB2 dual-
fusion (W303)") &
  theme(plot.title = element_text(hjust = 0.5))
plot186_all

```

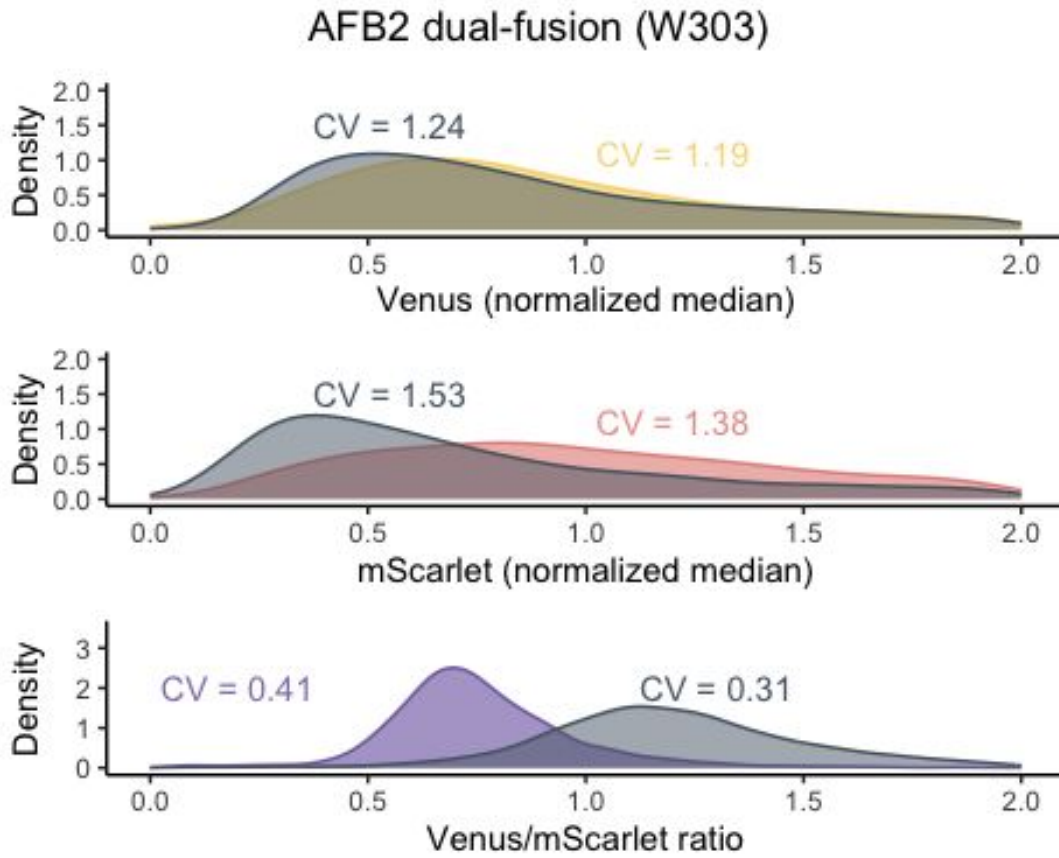

```
# ggsave('plot186_all.png', width = 6, height = 5)
```

#### Supporting Figure S2C: yWL209 (TIR1 in cis, YPH499 yeast)

```
data209 <- steadyState(aplate_03112022, gated = TRUE)
## [1] "No further gating applied."
## [1] "Converting events..."
data209 <- subset(data209, strain == "yWL209" & name %in% c("803112022-Pat-
TCA08_Time-course assay_Auxin_yWL209-C1.fcs",
"803112022-Pat-TCA08_Time-course assay_Control_yWL209-C1.fcs"))

cv <- function(x) return(round(sd(x)/mean(x), 2))

data209 <- subset(data209, BL1.A > 1 & YL1.A > 1)
data209$FLratio <- data209$BL1.A/data209$YL1.A
range(data209$BL1.A)
## [1] 9 1048575
cv <- function(x) return(round(sd(x)/mean(x), 2))

data209$Venus <- data209$BL1.A/median(data209$BL1.A)
data209$mScarlet <- data209$YL1.A/median(data209$YL1.A)
```

```

data209$FLratio <- data209$BL1.A/data209$YL1.A
data209$ratio <- data209$FLratio/median(data209$FLratio)

data_long209 <- data209 %>%
  dplyr::select(treatment, Venus, mScarlet, ratio, strain) %>%
  pivot_longer(cols = c(Venus, mScarlet, ratio), names_to = "parameter",
values_to = "value") %>%
  dplyr::mutate(parameter = fct_relevel(parameter, "Venus"))

# need to also format CVs appropriately for annotating

CV209 <- data209 %>%
  group_by(treatment) %>%
  dplyr::summarise(across(dplyr::where(is_double), cv)) %>%
  dplyr::select(treatment, Venus, mScarlet, ratio) %>%
  pivot_longer(cols = c(Venus, mScarlet, ratio), names_to = "parameter",
values_to = "value")

plot209 <- ggplot(data = data_long209, mapping = aes(x = value, color =
treatment)) +
  geom_density() + xlim(c(-1, 4)) + labs(x = "median normalized intensity",
color = "treatment") +
  theme_test() + geom_text(data = subset(CV209, treatment == "50 uM
Auxin"), aes(label = paste0("CV = ",
value))), x = 1.2, y = 1) + geom_text(data = subset(CV209, treatment ==
"Control"),
aes(label = paste0("CV = ", value)), x = 0, y = 1) +
scale_color_viridis_d(option = "D",
end = 0.75, direction = -1)

venus209 <- ggplot(data209, aes(x = data209$Venus, group = treatment, fill =
treatment,
color = treatment)) + geom_density(adjust = 1.5, alpha = 0.5) + labs(x =
"Venus",
y = "Density") + xlim(0, 2) + ylim(0, 1.5) + theme_classic() +
theme(legend.position = "none") +
geom_text(data = subset(CV209, parameter == "Venus" & treatment == "50 uM
Auxin"),
aes(label = paste0("CV = ", value)), x = 1.2, y = 1.1) +
geom_text(data = subset(CV209,
parameter == "Venus" & treatment == "Control"), aes(label = paste0("CV =
", value)),
x = 0.58, y = 1.3) + scale_color_manual(values = c("#f7cb44b2",
"#566573")) +
scale_fill_manual(values = c("#f7cb44b2", "#566573"))

```

```

red209 <- ggplot(data209, aes(x = data209$mScarlet, group = treatment, fill =
treatment,
  color = treatment)) + geom_density(adjust = 1.5, alpha = 0.5) + labs(x =
"mScarlet",
  y = "Density") + xlim(0, 2) + ylim(0, 1.5) + theme_classic() +
theme(legend.position = "none") +
  geom_text(data = subset(CV209, parameter == "mScarlet" & treatment == "50
uM Auxin"),
    aes(label = paste0("CV = ", value)), x = 1.3, y = 1) + geom_text(data
= subset(CV209,
  parameter == "mScarlet" & treatment == "Control"), aes(label = paste0("CV
= ",
  value)), x = 0.59, y = 1.3) + scale_color_manual(values = c("#de7065b2",
"#566573")) +
  scale_fill_manual(values = c("#de7065b2", "#566573"))

ratio209 <- ggplot(data209, aes(x = data209$ratio, group = treatment, fill =
treatment,
  color = treatment)) + geom_density(adjust = 1.5, alpha = 0.5) + labs(x =
"Venus/mScarlet ratio",
  y = "Density") + xlim(0, 2) + ylim(0, 3.2) + theme_classic() +
theme(legend.position = "none") +
  geom_text(data = subset(CV209, parameter == "ratio" & treatment == "50 uM
Auxin"),
    aes(label = paste0("CV = ", value)), x = 0.6, y = 3.1) +
geom_text(data = subset(CV209,
  parameter == "ratio" & treatment == "Control"), aes(label = paste0("CV =
", value)),
  x = 1.6, y = 2.3) + scale_color_manual(values = c("#593d9cb2",
"#566573")) +
  scale_fill_manual(values = c("#593d9cb2", "#566573"))

plot209 <- grid.arrange(venus209, red209, ratio209, nrow = 3, ncol = 1)

```

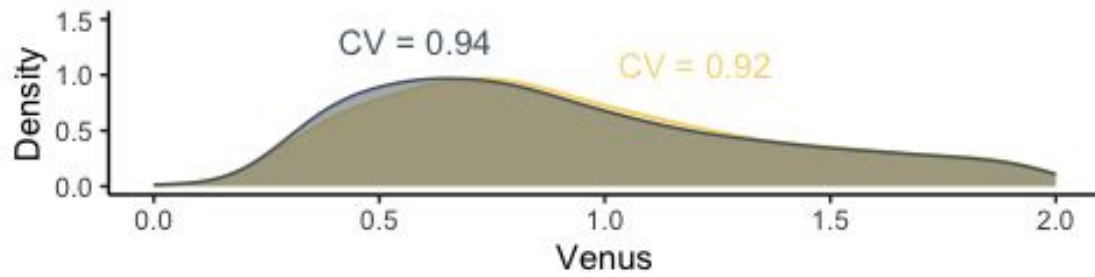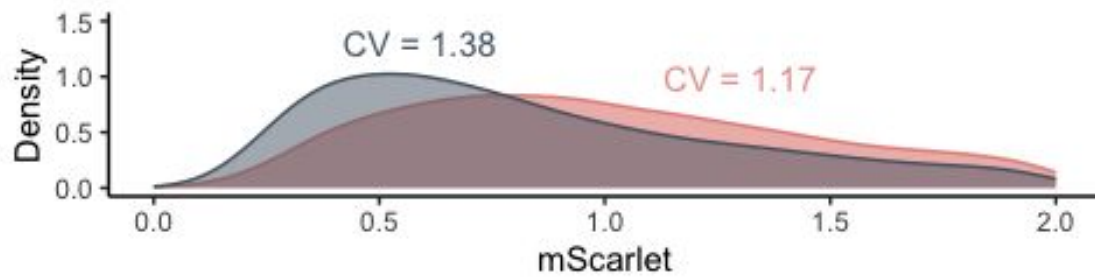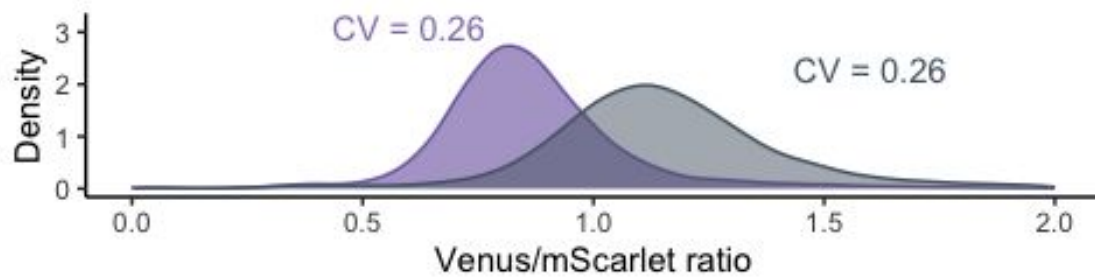

```
plot209 <- annotate_figure(plot209, top = text_grob("TIR1", color = "black",
size = 12))
plot209
```

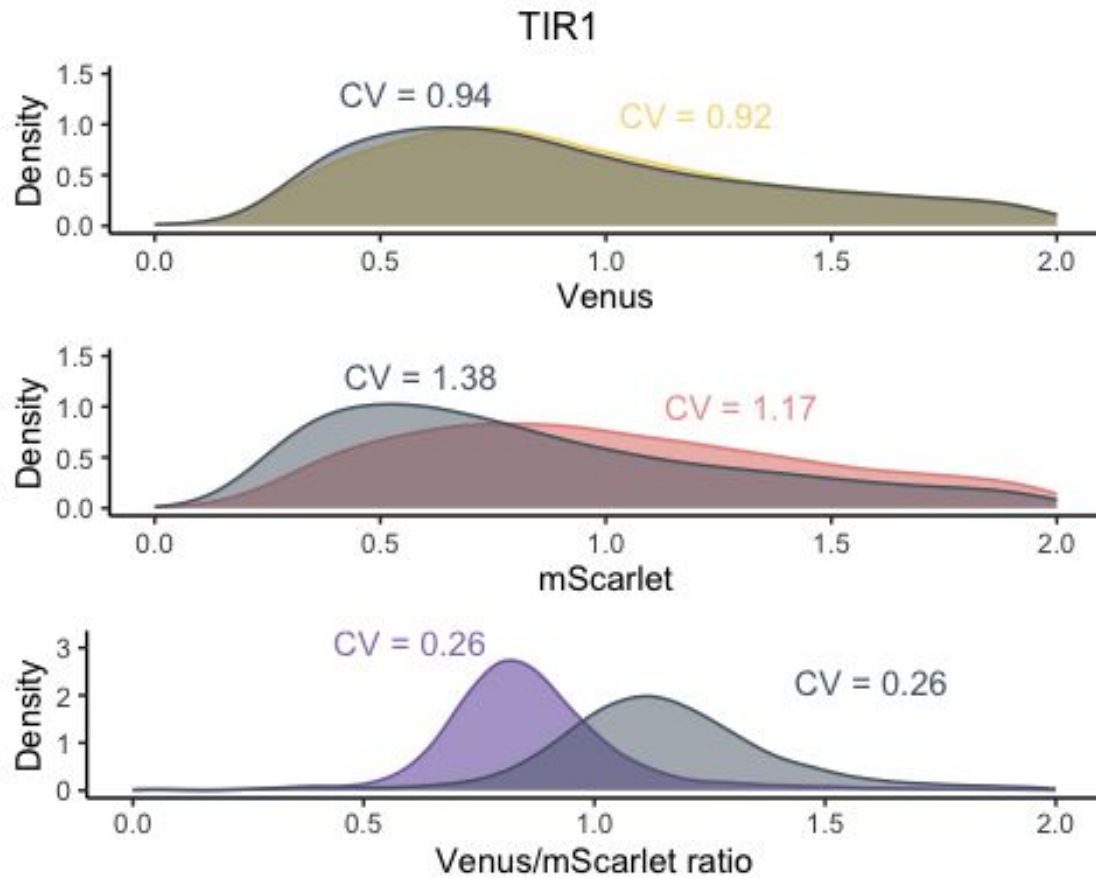

```
plot209_all <- venus209/red209/ratio209 + plot_annotation(title = "TIR1 dual-
fusion (YPH499)") &
  theme(plot.title = element_text(hjust = 0.5))
plot209_all
```

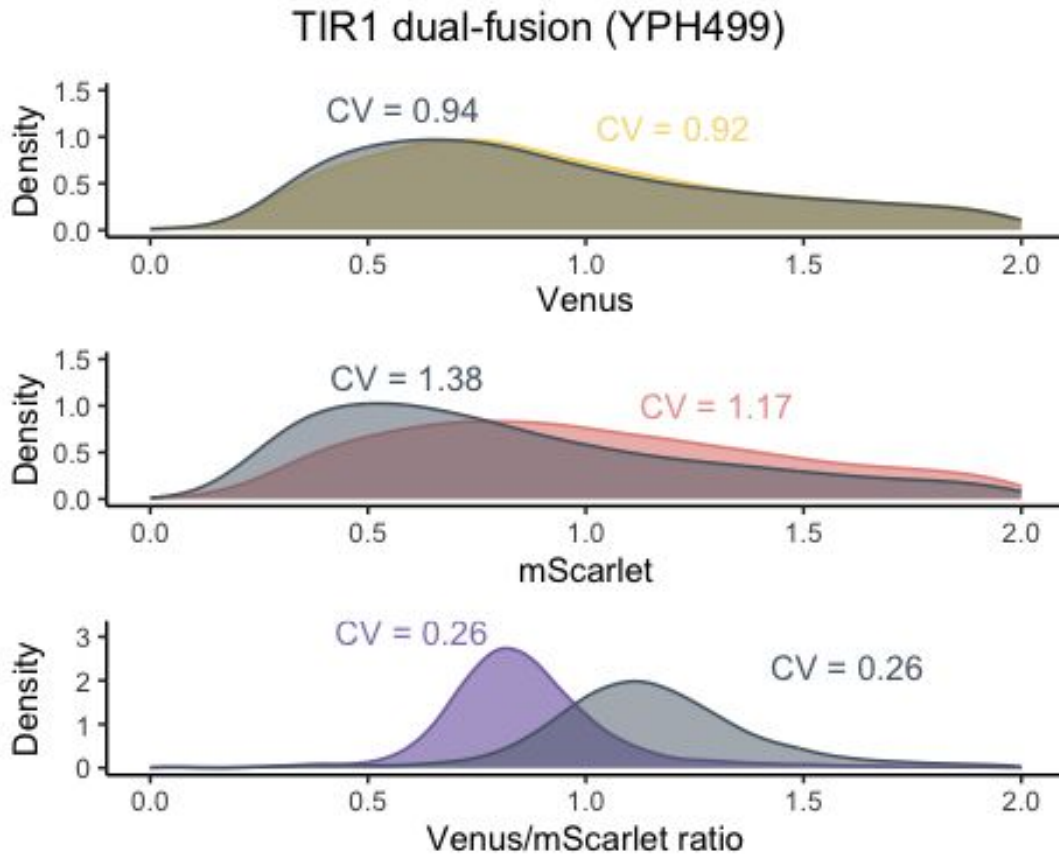

```
# ggsave('plot209_all.png', width = 6, height = 5)
```

Supporting Figure S2D: yWL210 (AFB2 cis in YPH499 yeast)

```
data210 <- steadyState(plate_03112022, gated = TRUE)
## [1] "No further gating applied."
## [1] "Converting events..."
# data <- tidyFlow(plate_20210619_W303)

data210 <- subset(data210, strain == "yWL210" & name %in% c("803112022-Pat-
TCA08_Time-course assay_Auxin_yWL210-C1.fcs",
"803112022-Pat-TCA08_Time-course assay_Control_yWL210-C1.fcs"))

cv <- function(x) return(round(sd(x)/mean(x), 2))

data210 <- subset(data210, BL1.A > 1 & YL1.A > 1)
data210$FLratio <- data210$BL1.A/data210$YL1.A
range(data210$BL1.A)
## [1] 25 1048575
cv <- function(x) return(round(sd(x)/mean(x), 2))
```



```

data210$Venus <- data210$BL1.A/median(data210$BL1.A)
data210$mScarlet <- data210$YL1.A/median(data210$YL1.A)
data210$FLratio <- data210$BL1.A/data210$YL1.A
data210$ratio <- data210$FLratio/median(data210$FLratio)

data_long210 <- data210 %>%
  dplyr::select(treatment, Venus, mScarlet, ratio, strain) %>%
  pivot_longer(cols = c(Venus, mScarlet, ratio), names_to = "parameter",
values_to = "value") %>%
  dplyr::mutate(parameter = fct_relevel(parameter, "Venus"))

# need to also format CVs appropriately for annotating

CV210 <- data210 %>%
  group_by(treatment) %>%
  dplyr::summarise(across(dplyr::where(is_double), cv)) %>%
  dplyr::select(treatment, Venus, mScarlet, ratio) %>%
  pivot_longer(cols = c(Venus, mScarlet, ratio), names_to = "parameter",
values_to = "value")

plot210 <- ggplot(data = data_long210, mapping = aes(x = value, color =
treatment)) +
  geom_density() + xlim(c(-1, 4)) + labs(x = "median normalized intensity",
color = "treatment") +
  theme_test() + geom_text(data = subset(CV210, treatment == "50 uM
Auxin"), aes(label = paste0("CV = ",
value)), x = 2, y = 1) + geom_text(data = subset(CV210, treatment ==
"Control"),
aes(label = paste0("CV = ", value)), x = 0, y = 1) +
scale_color_viridis_d(option = "D",
end = 0.75, direction = -1)

venus210 <- ggplot(data210, aes(x = data210$Venus, group = treatment, color =
treatment,
fill = treatment)) + geom_density(adjust = 1.5, alpha = 0.5) + labs(x =
"Venus",
y = "Density") + xlim(0, 2) + ylim(0, 1.5) + theme_classic() +
theme(legend.position = "none") +
geom_text(data = subset(CV210, parameter == "Venus" & treatment == "50 uM
Auxin"),
aes(label = paste0("CV = ", value)), x = 1.2, y = 1.1) +
geom_text(data = subset(CV210,
parameter == "Venus" & treatment == "Control"), aes(label = paste0("CV =
", value)),
x = 0.58, y = 1.3) + scale_color_manual(values = c("#f7cb44b2",
"#566573")) +
scale_fill_manual(values = c("#f7cb44b2", "#566573"))

```

```

red210 <- ggplot(data210, aes(x = data210$mScarlet, group = treatment, color = treatment,
  fill = treatment)) + geom_density(adjust = 1.5, alpha = 0.5) + labs(x =
  "mScarlet",
  y = "Density") + xlim(0, 2) + ylim(0, 1.5) + theme_classic() +
  theme(legend.position = "none") +
  geom_text(data = subset(CV210, parameter == "mScarlet" & treatment == "50
  uM Auxin"),
  aes(label = paste0("CV = ", value)), x = 1.3, y = 1) + geom_text(data
  = subset(CV210,
  parameter == "mScarlet" & treatment == "Control"), aes(label = paste0("CV
  = ",
  value)), x = 0.59, y = 1.3) + scale_color_manual(values = c("#de7065b2",
  "#566573")) +
  scale_fill_manual(values = c("#de7065b2", "#566573"))

ratio210 <- ggplot(data210, aes(x = data210$ratio, group = treatment, color =
  treatment,
  fill = treatment)) + geom_density(adjust = 1.5, alpha = 0.5) + labs(x =
  "Venus/mScarlet ratio",
  y = "Density") + xlim(0, 2) + ylim(0, 3.2) + theme_classic() +
  theme(legend.position = "none") +
  geom_text(data = subset(CV210, parameter == "ratio" & treatment == "50 uM
  Auxin"),
  aes(label = paste0("CV = ", value)), x = 0.6, y = 2.3) +
  geom_text(data = subset(CV210,
  parameter == "ratio" & treatment == "Control"), aes(label = paste0("CV =
  ", value)),
  x = 1.5, y = 1.8) + scale_color_manual(values = c("#593d9cb2",
  "#566573")) +
  scale_fill_manual(values = c("#593d9cb2", "#566573"))
ratio210

```

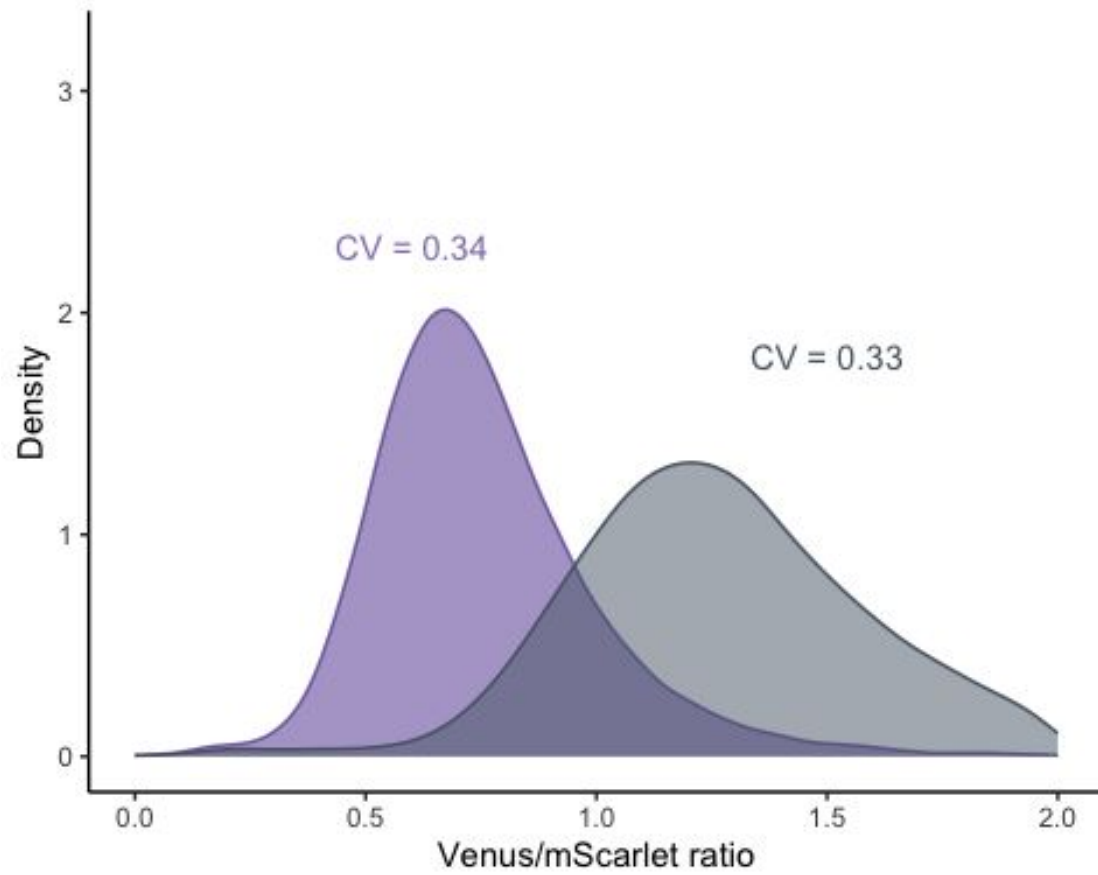

```
plot210 <- grid.arrange(venus210, red210, ratio210, nrow = 3, ncol = 1)
```

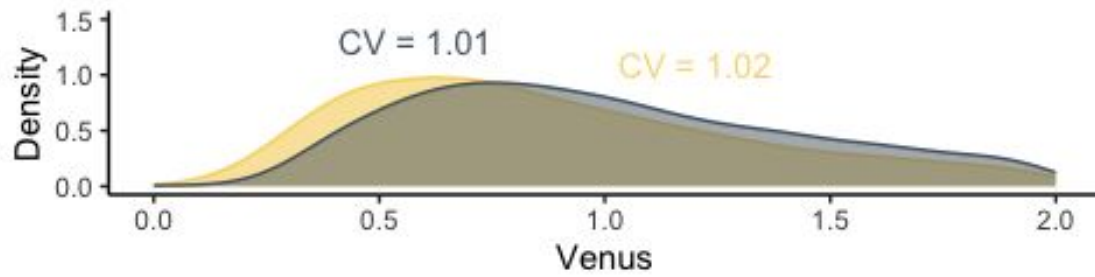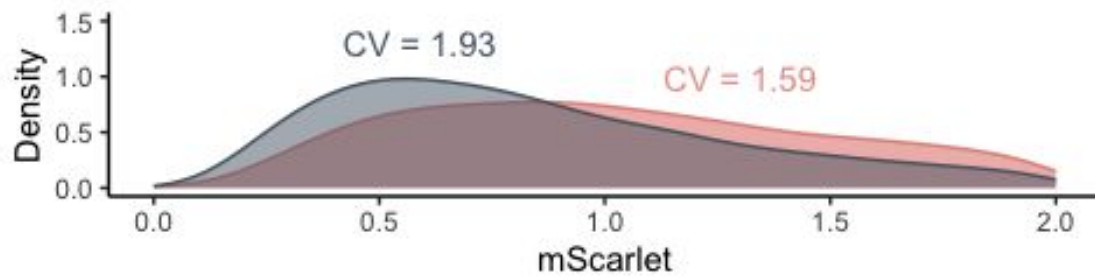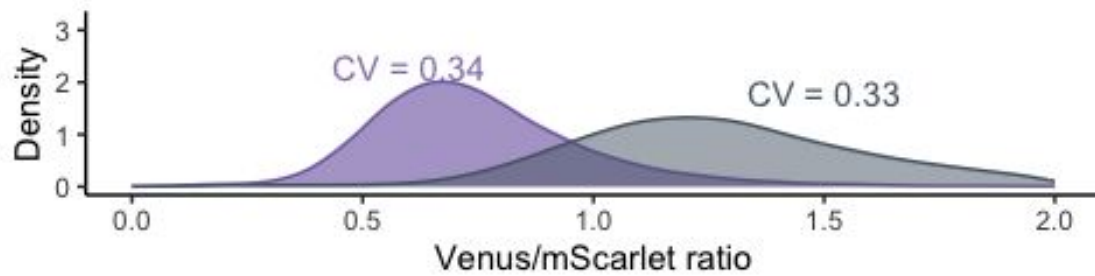

```
plot210 <- annotate_figure(plot210, top = text_grob("AFB2", color = "black",
size = 12))
```

```
plot210
```

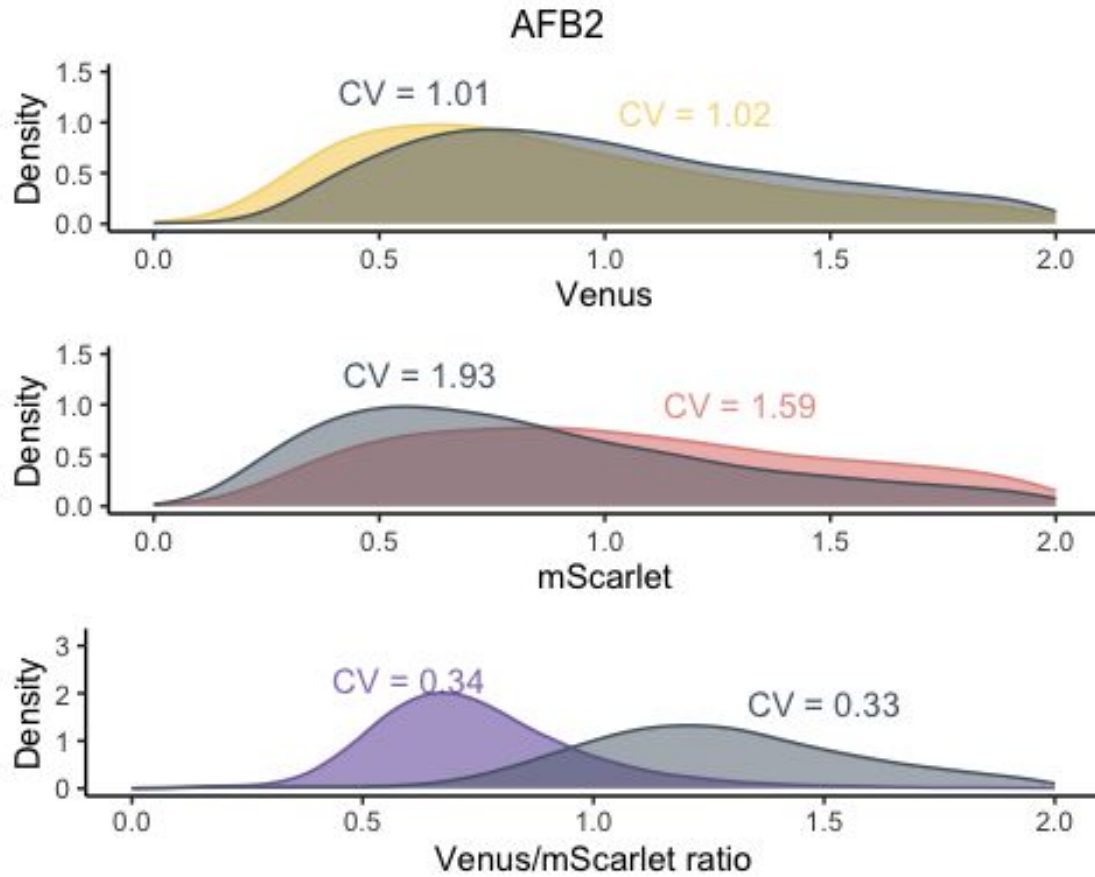

```
plot210_all <- venus210/red210/ratio210 + plot_annotation(title = "AFB2 dual-
fusion (YPH499)") &
  theme(plot.title = element_text(hjust = 0.5))
plot210_all
```

## AFB2 dual-fusion (YPH499)

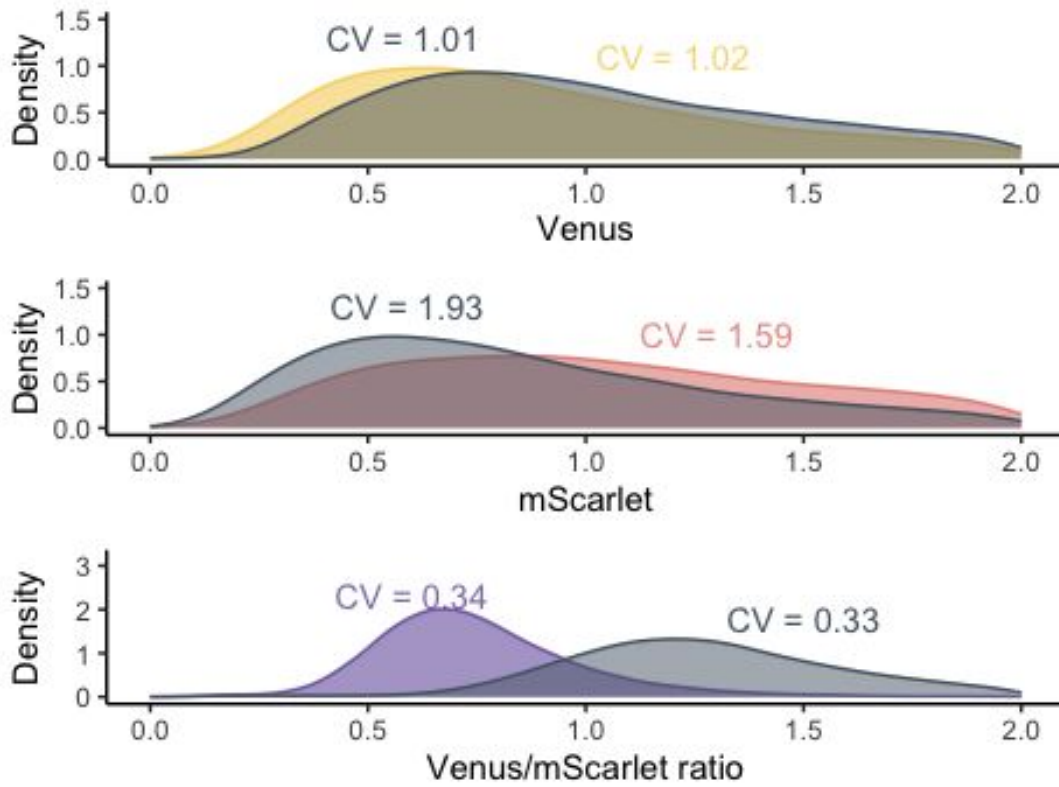

```
# ggsave('plot210_all.png', width = 6, height = 5)
cvplots_all <- ggarrange(plot185_all, plot186_all, plot209_all, plot210_all,
  labels = c("A",
    "B", "C", "D"), nrow = 1, ncol = 4)
cvplots_all <- ggarrange(plot185_all, plot186_all, plot209_all, plot210_all,
  nrow = 1,
  ncol = 4)
cvplots_all
```

dual-fusion AFB2 dual-fusion TIR1 dual-fusion AFB2 dual-fusion (YP)

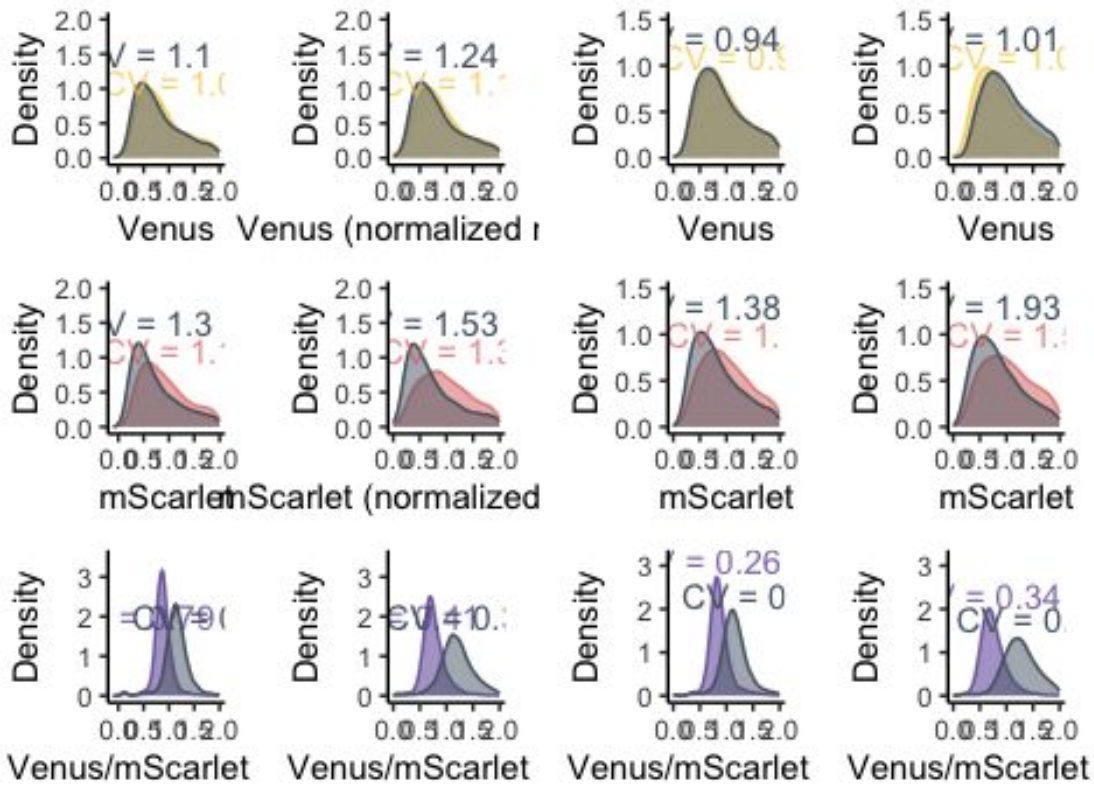

```
# ggsave('cvplots_all.png', width = 12.5, height = 5)
ggsave('Supplement1.pdf',
# width = 12.5, height = 5)
```

Supporting Figure S4: Comparison between the biosensor in cis and trans in the same W303 yeast strain ()

- yWL161 (TIR1 in trans, W303 yeast)
- yWL162 (AFB2 in trans, W303 yeast)
- yWL185 (TIR1 in cis, W303 yeast)
- yWL186 (AFB2 in cis, W303 yeast)

```
plate_20210619_W303 <- read.plateSet(path = "Data for
publication/20210619/W303only/",
pattern = "r*")

annotation <- createAnnotation(yourFlowSet = plate_20210619_W303)
write.csv(annotation, "Data for
publication/20210619/20210619_W303only_annotation.csv")

annotation <- read.csv("Data for
publication/20210619/20210619_W303only_annotation.csv")
aplate_20210619_W303 <- annotateFlowSet(yourFlowSet = plate_20210619_W303,
annotation_df = annotation,
```

```

mergeBy = "name")
head(rownames(pData(aplate_20210619_W303)))
# # [1] "1B01.fcs" "1B02.fcs" "1B03.fcs" "1B04.fcs" "1B07.fcs" "1B08.fcs"
head(pData(aplate_20210619_W303))
# #           name folder X strain treatment reading before_after
# # 1B01.fcs 1B01.fcs   r02 1 yWL161   Control       2      before
# # 1B02.fcs 1B02.fcs   r02 2 yWL162   Control       2      before
# # 1B03.fcs 1B03.fcs   r02 3 yWL185   Control       2      before
# # 1B04.fcs 1B04.fcs   r02 4 yWL186   Control       2      before
# # 1B07.fcs 1B07.fcs   r02 5 yWL161   Auxin         2      before
# # 1B08.fcs 1B08.fcs   r02 6 yWL162   Auxin         2      before
# #           design_construct      design_yeast
# # 1B01.fcs      TIR1 trans TIR1 single-fusion
# # 1B02.fcs      AFB2 trans AFB2 single-fusion
# # 1B03.fcs      TIR1 cis   TIR1 dual-fusion
# # 1B04.fcs      AFB2 cis   AFB2 dual-fusion
# # 1B07.fcs      TIR1 trans TIR1 single-fusion
# # 1B08.fcs      AFB2 trans AFB2 single-fusion

plate_20210619_W303_sum <- summarizeFlow(aplate_20210619_W303, channel =
c("FL1.A",
  "FL4.A"), gated = TRUE)
# # [1] "Summarizing all events..."

plate_20210619_W303_sum$treatment <-
factor(plate_20210619_W303_sum$treatment, levels = c("Control",
  "Auxin"))

# The time auxin addition is equal to time zero
time0 <- "4E01.fcs"
# or whatever well was being read when auxin was added

plate_20210619_W303_sum$time <- plate_20210619_W303_sum$btime -
plate_20210619_W303_sum[[which(plate_20210619_W303_sum$name ==
  time0), "btime"]]
# single bracket --> extracting the all name, 2 brackets extract just single
# 'value' or 'values'

library(tidyverse)
# %>% pass the object to the right side

plate_20210619_W303_sum <- plate_20210619_W303_sum %>%
  mutate(design = case_when(strain %in% c("yWL185", "yWL186") ~ "cis",
    strain %in%
      c("yWL161", "yWL162") ~ "trans"), fbox = case_when(strain %in%
c("yWL161",
  "yWL185") ~ "TIR1", strain %in% c("yWL162", "yWL186") ~ "AFB2"))

plate_20210619_W303_sum <- plate_20210619_W303_sum %>%

```



```

mutate(ratio = FL1.Amean/FL4.Amean) %>%
group_by(design, fbox) %>%
mutate(normalizedratio = ratio/mean(ratio))

plate_20210619_W303_sum <- plate_20210619_W303_sum %>%
mutate(green = FL1.Amean) %>%
group_by(design, fbox) %>%
mutate(normalized_Greenexpression = FL1.Amean/mean(FL1.Amean))

plate_20210619_W303_sum <- plate_20210619_W303_sum %>%
mutate(red = FL4.Amean) %>%
group_by(design, fbox) %>%
mutate(normalized_Redexpression = FL4.Amean/mean(FL4.Amean))

```

**Supporting Figure S4A: Venus-IAA17 expression for single and dual fusion biosensor in the same W303 yeast strain**

```

boxvenus <- ggplot(subset(plate_20210619_W303_sum, before_after == "after" &
reading %in%
  c("11", "12", "13", "14")), aes(x = design_construct, y = FL1.Amean, fill
= treatment)) +
  geom_boxplot(aes(color = treatment), alpha = 0.7) + geom_jitter(position
= position_dodge(0.8),
  aes(color = treatment), size = 1) + scale_fill_manual(values =
c("#BFC9CA", "#FDCB26FF")) +
  scale_color_manual(values = c("#7F8C8D", "#FEB72DFF")) + ylab("Venus-
IAA17") +
  xlab("Biosensor Designs") + theme_classic() + theme(legend.position =
"right",
  axis.title.y = element_text(size = 12, face = "bold"), axis.title.x =
element_text(size = 12,
  face = "bold"), axis.text = element_text(size = 10), legend.title =
element_text(size = 10,
  face = "bold"), legend.text = element_text(size = 10)) + labs(fill =
"Treatment",
  color = "Treatment", shape = "Treatment") + stat_compare_means(method =
"t.test",
  label = "..p.signif..", hide.ns = FALSE, size = 5, label.y = 0.2) +
scale_x_discrete(labels = c(`AFB2 cis` = "AFB2\ndual-fusion",
`AFB2 trans` = "AFB2\nsingle-fusion", `TIR1 cis` = "TIR1\ndual-fusion",
`TIR1 trans` = "TIR1\nsingle-fusion"))

boxvenus

```

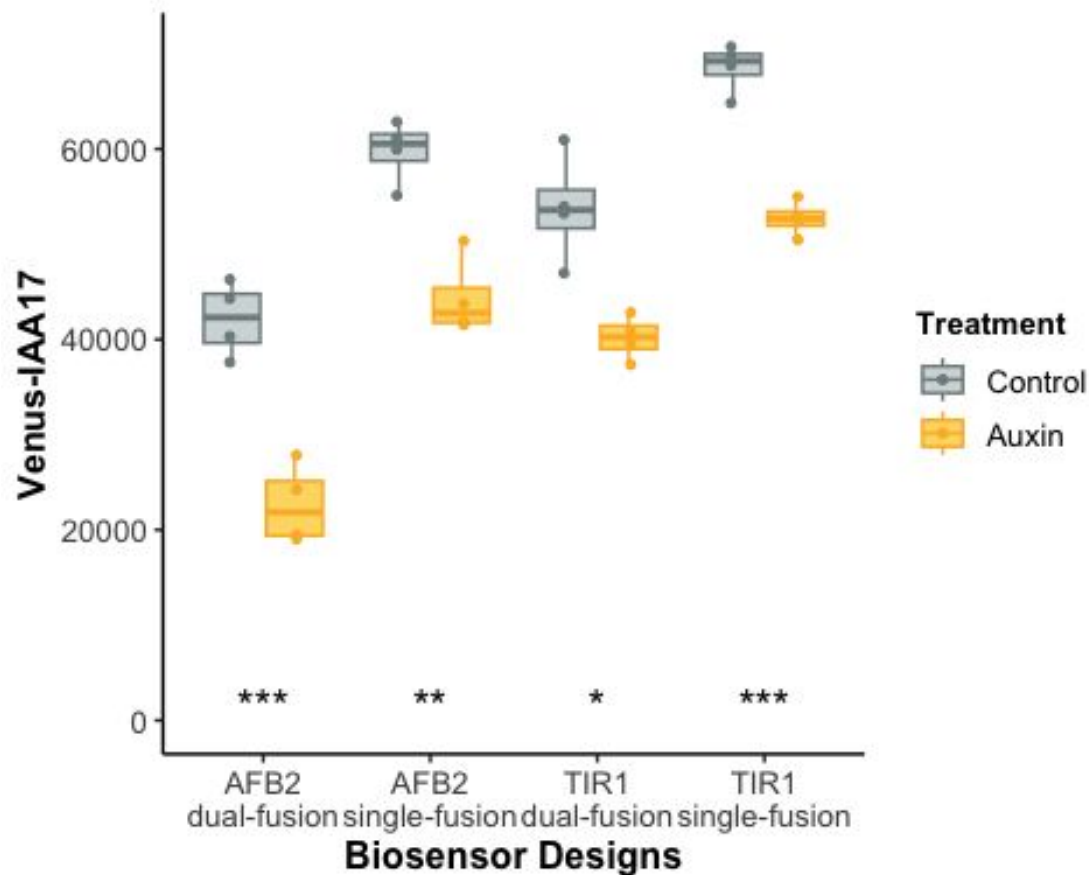

Supporting Figure S4B: TIR1/AFB2- or free mScarlet-I expression for single and dual fusion biosensor in the same W303 yeast strain

```

boxmScarlet <- ggplot(subset(plate_20210619_W303_sum, before_after == "after"
& reading %in%
  c("11", "12", "13", "14")), aes(x = design_construct, y = FL4.Amean, fill
= treatment)) +
  geom_boxplot(aes(color = treatment), alpha = 0.7) + geom_jitter(position
= position_dodge(0.8),
  aes(color = treatment), size = 1) + scale_fill_manual(values =
c("#BFC9CA", "#D14E72FF")) +
  scale_color_manual(values = c("#7F8C8D", "#9C2964FF")) + ylab("TIR1/AFB2-
\n or free mScarlet-I") +
  xlab("Biosensor Designs") + theme_classic() + theme(legend.position =
"right",
  axis.title.y = element_text(size = 12, face = "bold"), axis.title.x =
element_text(size = 12,
  face = "bold"), axis.text = element_text(size = 10), legend.title =
element_text(size = 10,
  face = "bold"), legend.text = element_text(size = 10)) + labs(fill =
"Treatment",
  color = "Treatment", shape = "Treatment") + stat_compare_means(method =
"t.test",

```

```

label = "..p.signif..", hide.ns = FALSE, size = 5, label.y = 0.2) +
scale_x_discrete(labels = c(`AFB2 cis` = "AFB2\ndual-fusion",
`AFB2 trans` = "AFB2\nsingle-fusion", `TIR1 cis` = "TIR1\ndual-fusion",
`TIR1 trans` = "TIR1\nsingle-fusion"))

```

boxmScarlet

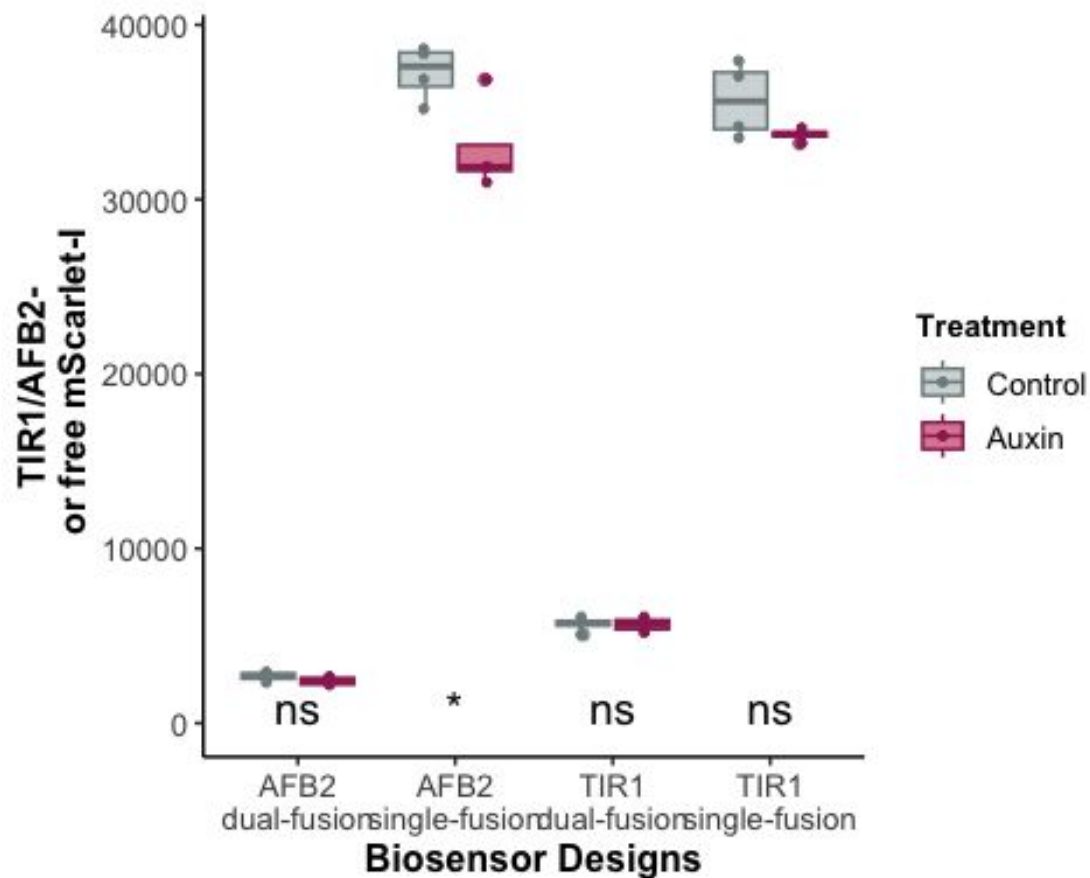

Supporting Figure S4C: Venus/mScarlet-I expression ratio for single and dual fusion biosensor in the same W303 yeast strain

```

boxvenusmScarlet <- ggplot(subset(plate_20210619_w303_sum, before_after ==
"after" &
  reading %in% c("11", "12", "13", "14")), aes(x = design_construct, y =
normalizedratio,
  fill = treatment)) + geom_boxplot(aes(color = treatment), alpha = 0.7) +
geom_jitter(position = position_dodge(0.8),
  aes(color = treatment), size = 1) + scale_fill_manual(values =
c("#BFC9CA", "#6b4596ff")) +
  scale_color_manual(values = c("#7F8C8D", "#6b4596ff")) + ylab("Normalized
Venus/mScarlet-I ") +

```

```

xlab("Biosensor Designs") + theme_classic() + theme(legend.position =
"right",
axis.title.y = element_text(size = 12, face = "bold"), axis.title.x =
element_text(size = 12,
face = "bold"), axis.text = element_text(size = 10), legend.title =
element_text(size = 10,
face = "bold"), legend.text = element_text(size = 10)) + labs(fill =
"Treatment",
color = "Treatment", shape = "Treatment") + stat_compare_means(method =
"t.test",
label = "..p.signif..", hide.ns = FALSE, size = 5, label.y = 0.5) +
scale_x_discrete(labels = c(`AFB2 cis` = "AFB2\ndual-fusion",
`AFB2 trans` = "AFB2\nsingle-fusion", `TIR1 cis` = "TIR1\ndual-fusion",
`TIR1 trans` = "TIR1\nsingle-fusion"))

```

boxvenusmScarlet

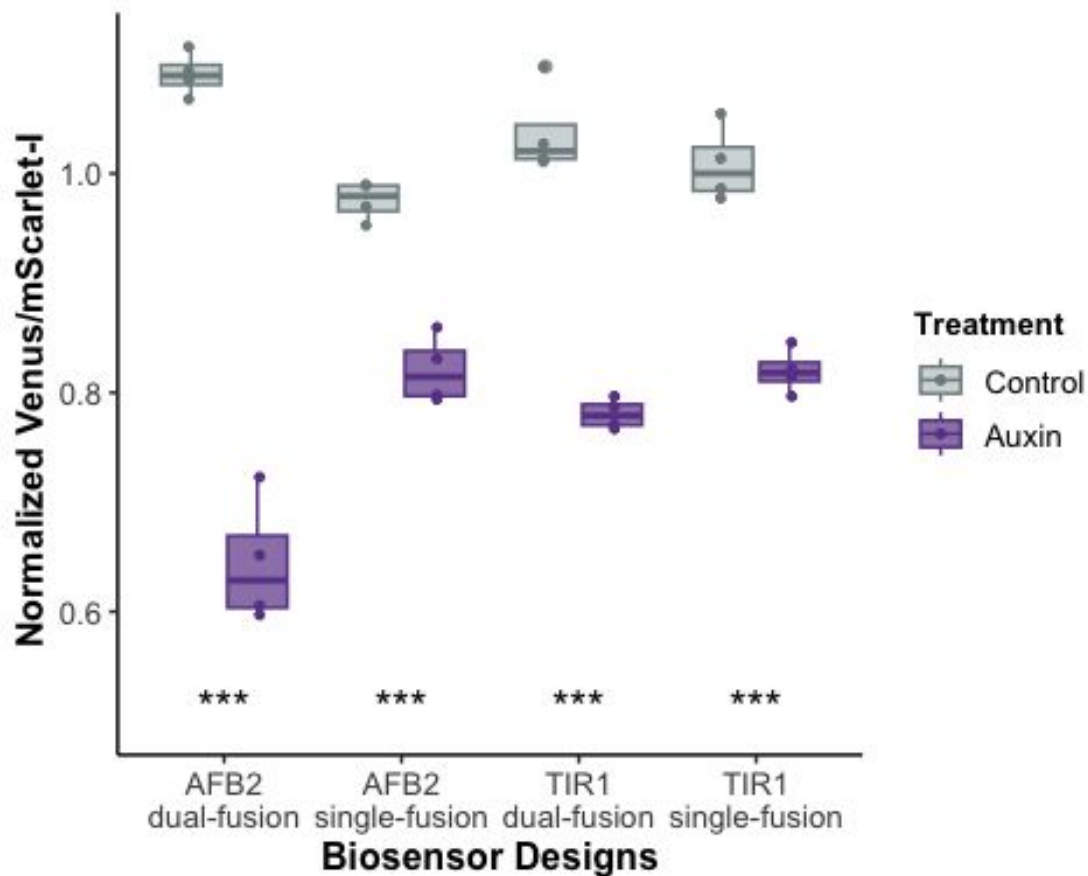

```

boxvenusmScarlet <- ggarrange(boxvenusmScarlet, labels = c("C"), nrow = 1,
ncol = 1)

```

```

boxFL303_VenusScarlet <- ggarrange(boxvenus, boxmScarlet, labels = c("A",

```

```
"B"), nrow = 2,
      ncol = 1)
boxFL303_VenusScarlet
```

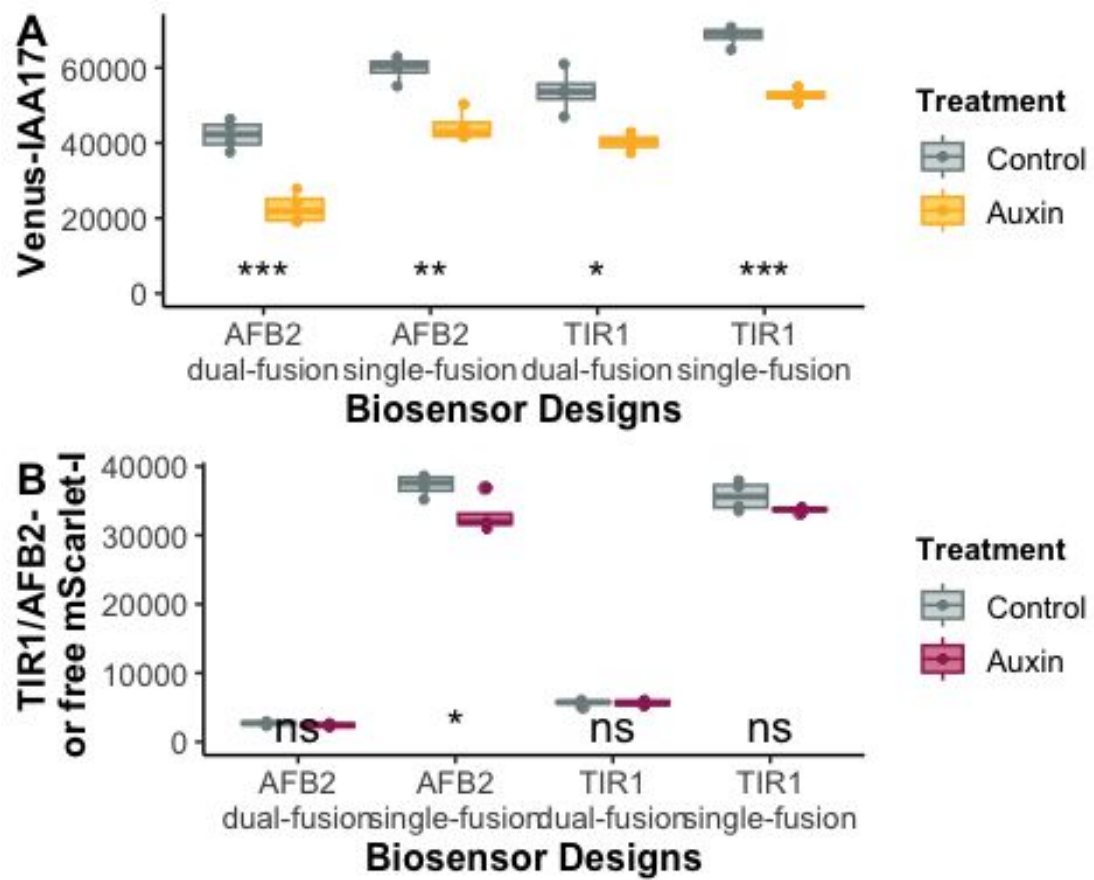

```
Sup3 <- ggarrange(boxFL303_VenusScarlet, boxvenusmScarlet, nrow = 1, ncol =
2, widths = c(1,
0.8))
Sup3
```

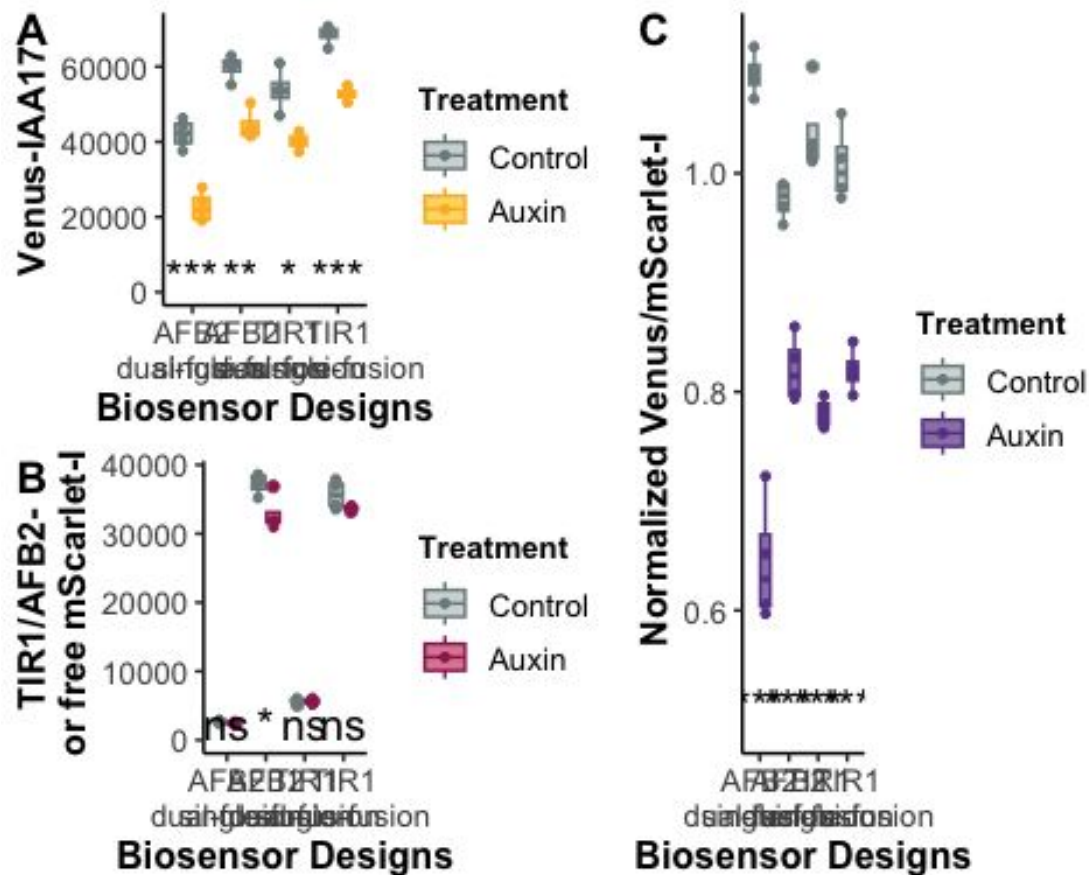

```
# ggsave('Supplment3_renamed.pdf', height = 5, width = 12)
```

Supporting Figure S5: Comparison of biosensor designs in different yeast strains

```
plate_07142023_3readsbefore_after <- read.plateSet(path = "Data for
publication/07142023_Time-course assay/read123-8910/",
pattern = "TCA*")

annotation <- createAnnotation(yourFlowSet =
plate_07142023_3readsbefore_after)
write.csv(annotation, "Data for publication/07142023_Time-course
assay/3readsbefore_after_annotation.csv")

annotation <- read.csv("Data for publication/07142023_Time-course
assay/3readsbefore_after_annotation.csv")
aplate_07142023_3readsbefore_after <- annotateFlowSet(yourFlowSet =
plate_07142023_3readsbefore_after,
annotation_df = annotation, mergeBy = "name")
head(rownames(pData(aplate_07142023_3readsbefore_after)))
## [1] "1Pat-07142023-Biosensors_cis-trans_TCA01_Experiment_50uM IAA
treatment_yWL161.fcs"
## [2] "1Pat-07142023-Biosensors_cis-trans_TCA01_Experiment_50uM IAA
treatment_yWL162.fcs"
```

```

## [3] "1Pat-07142023-Biosensors_cis-trans_TCA01_Experiment_50uM IAA
treatment_yWL185.fcs"
## [4] "1Pat-07142023-Biosensors_cis-trans_TCA01_Experiment_50uM IAA
treatment_yWL186.fcs"
## [5] "1Pat-07142023-Biosensors_cis-trans_TCA01_Experiment_50uM IAA
treatment_yWL209.fcs"
## [6] "1Pat-07142023-Biosensors_cis-trans_TCA01_Experiment_50uM IAA
treatment_yWL210.fcs"
head(pData(aplate_07142023_3readsbefore_after))
##
name
## 1Pat-07142023-Biosensors_cis-trans_TCA01_Experiment_50uM IAA
treatment_yWL161.fcs 1Pat-07142023-Biosensors_cis-trans_TCA01_Experiment_50uM
IAA treatment_yWL161.fcs
## 1Pat-07142023-Biosensors_cis-trans_TCA01_Experiment_50uM IAA
treatment_yWL162.fcs 1Pat-07142023-Biosensors_cis-trans_TCA01_Experiment_50uM
IAA treatment_yWL162.fcs
## 1Pat-07142023-Biosensors_cis-trans_TCA01_Experiment_50uM IAA
treatment_yWL185.fcs 1Pat-07142023-Biosensors_cis-trans_TCA01_Experiment_50uM
IAA treatment_yWL185.fcs
## 1Pat-07142023-Biosensors_cis-trans_TCA01_Experiment_50uM IAA
treatment_yWL186.fcs 1Pat-07142023-Biosensors_cis-trans_TCA01_Experiment_50uM
IAA treatment_yWL186.fcs
## 1Pat-07142023-Biosensors_cis-trans_TCA01_Experiment_50uM IAA
treatment_yWL209.fcs 1Pat-07142023-Biosensors_cis-trans_TCA01_Experiment_50uM
IAA treatment_yWL209.fcs
## 1Pat-07142023-Biosensors_cis-trans_TCA01_Experiment_50uM IAA
treatment_yWL210.fcs 1Pat-07142023-Biosensors_cis-trans_TCA01_Experiment_50uM
IAA treatment_yWL210.fcs
##
folder
## 1Pat-07142023-Biosensors_cis-trans_TCA01_Experiment_50uM IAA
treatment_yWL161.fcs TCA01
## 1Pat-07142023-Biosensors_cis-trans_TCA01_Experiment_50uM IAA
treatment_yWL162.fcs TCA01
## 1Pat-07142023-Biosensors_cis-trans_TCA01_Experiment_50uM IAA
treatment_yWL185.fcs TCA01
## 1Pat-07142023-Biosensors_cis-trans_TCA01_Experiment_50uM IAA
treatment_yWL186.fcs TCA01
## 1Pat-07142023-Biosensors_cis-trans_TCA01_Experiment_50uM IAA
treatment_yWL209.fcs TCA01
## 1Pat-07142023-Biosensors_cis-trans_TCA01_Experiment_50uM IAA
treatment_yWL210.fcs TCA01
##
X
## 1Pat-07142023-Biosensors_cis-trans_TCA01_Experiment_50uM IAA
treatment_yWL161.fcs 1
## 1Pat-07142023-Biosensors_cis-trans_TCA01_Experiment_50uM IAA
treatment_yWL162.fcs 2
## 1Pat-07142023-Biosensors_cis-trans_TCA01_Experiment_50uM IAA

```

```

treatment_yWL185.fcs 3
# # 1Pat-07142023-Biosensors_cis-trans_TCA01_Experiment_50uM IAA
treatment_yWL186.fcs 4
# # 1Pat-07142023-Biosensors_cis-trans_TCA01_Experiment_50uM IAA
treatment_yWL209.fcs 5
# # 1Pat-07142023-Biosensors_cis-trans_TCA01_Experiment_50uM IAA
treatment_yWL210.fcs 6
# #
strain
# # 1Pat-07142023-Biosensors_cis-trans_TCA01_Experiment_50uM IAA
treatment_yWL161.fcs yWL161
# # 1Pat-07142023-Biosensors_cis-trans_TCA01_Experiment_50uM IAA
treatment_yWL162.fcs yWL162
# # 1Pat-07142023-Biosensors_cis-trans_TCA01_Experiment_50uM IAA
treatment_yWL185.fcs yWL185
# # 1Pat-07142023-Biosensors_cis-trans_TCA01_Experiment_50uM IAA
treatment_yWL186.fcs yWL186
# # 1Pat-07142023-Biosensors_cis-trans_TCA01_Experiment_50uM IAA
treatment_yWL209.fcs yWL209
# # 1Pat-07142023-Biosensors_cis-trans_TCA01_Experiment_50uM IAA
treatment_yWL210.fcs yWL210
# #
treatment
# # 1Pat-07142023-Biosensors_cis-trans_TCA01_Experiment_50uM IAA
treatment_yWL161.fcs 50uM IAA
# # 1Pat-07142023-Biosensors_cis-trans_TCA01_Experiment_50uM IAA
treatment_yWL162.fcs 50uM IAA
# # 1Pat-07142023-Biosensors_cis-trans_TCA01_Experiment_50uM IAA
treatment_yWL185.fcs 50uM IAA
# # 1Pat-07142023-Biosensors_cis-trans_TCA01_Experiment_50uM IAA
treatment_yWL186.fcs 50uM IAA
# # 1Pat-07142023-Biosensors_cis-trans_TCA01_Experiment_50uM IAA
treatment_yWL209.fcs 50uM IAA
# # 1Pat-07142023-Biosensors_cis-trans_TCA01_Experiment_50uM IAA
treatment_yWL210.fcs 50uM IAA
# #
design_strain
# # 1Pat-07142023-Biosensors_cis-trans_TCA01_Experiment_50uM IAA
treatment_yWL161.fcs TIR1-trans_W303
# # 1Pat-07142023-Biosensors_cis-trans_TCA01_Experiment_50uM IAA
treatment_yWL162.fcs AFB2-trans_W303
# # 1Pat-07142023-Biosensors_cis-trans_TCA01_Experiment_50uM IAA
treatment_yWL185.fcs TIR1-cis_W303
# # 1Pat-07142023-Biosensors_cis-trans_TCA01_Experiment_50uM IAA
treatment_yWL186.fcs AFB2-cis_W303
# # 1Pat-07142023-Biosensors_cis-trans_TCA01_Experiment_50uM IAA
treatment_yWL209.fcs TIR1-cis_YPH499
# # 1Pat-07142023-Biosensors_cis-trans_TCA01_Experiment_50uM IAA
treatment_yWL210.fcs AFB2-cis_YPH499
# #

```



```

receptor
# # 1Pat-07142023-Biosensors_cis-trans_TCA01_Experiment_50uM IAA
treatment_yWL161.fcs      TIR1
# # 1Pat-07142023-Biosensors_cis-trans_TCA01_Experiment_50uM IAA
treatment_yWL162.fcs      AFB2
# # 1Pat-07142023-Biosensors_cis-trans_TCA01_Experiment_50uM IAA
treatment_yWL185.fcs      TIR1
# # 1Pat-07142023-Biosensors_cis-trans_TCA01_Experiment_50uM IAA
treatment_yWL186.fcs      AFB2
# # 1Pat-07142023-Biosensors_cis-trans_TCA01_Experiment_50uM IAA
treatment_yWL209.fcs      TIR1
# # 1Pat-07142023-Biosensors_cis-trans_TCA01_Experiment_50uM IAA
treatment_yWL210.fcs      AFB2
# #
reading
# # 1Pat-07142023-Biosensors_cis-trans_TCA01_Experiment_50uM IAA
treatment_yWL161.fcs      1
# # 1Pat-07142023-Biosensors_cis-trans_TCA01_Experiment_50uM IAA
treatment_yWL162.fcs      1
# # 1Pat-07142023-Biosensors_cis-trans_TCA01_Experiment_50uM IAA
treatment_yWL185.fcs      1
# # 1Pat-07142023-Biosensors_cis-trans_TCA01_Experiment_50uM IAA
treatment_yWL186.fcs      1
# # 1Pat-07142023-Biosensors_cis-trans_TCA01_Experiment_50uM IAA
treatment_yWL209.fcs      1
# # 1Pat-07142023-Biosensors_cis-trans_TCA01_Experiment_50uM IAA
treatment_yWL210.fcs      1
# #
before_after
# # 1Pat-07142023-Biosensors_cis-trans_TCA01_Experiment_50uM IAA
treatment_yWL161.fcs      before
# # 1Pat-07142023-Biosensors_cis-trans_TCA01_Experiment_50uM IAA
treatment_yWL162.fcs      before
# # 1Pat-07142023-Biosensors_cis-trans_TCA01_Experiment_50uM IAA
treatment_yWL185.fcs      before
# # 1Pat-07142023-Biosensors_cis-trans_TCA01_Experiment_50uM IAA
treatment_yWL186.fcs      before
# # 1Pat-07142023-Biosensors_cis-trans_TCA01_Experiment_50uM IAA
treatment_yWL209.fcs      before
# # 1Pat-07142023-Biosensors_cis-trans_TCA01_Experiment_50uM IAA
treatment_yWL210.fcs      before
# #
phase
# # 1Pat-07142023-Biosensors_cis-trans_TCA01_Experiment_50uM IAA
treatment_yWL161.fcs      exponential
# # 1Pat-07142023-Biosensors_cis-trans_TCA01_Experiment_50uM IAA
treatment_yWL162.fcs      exponential
# # 1Pat-07142023-Biosensors_cis-trans_TCA01_Experiment_50uM IAA
treatment_yWL185.fcs      exponential
# # 1Pat-07142023-Biosensors_cis-trans_TCA01_Experiment_50uM IAA

```

```

treatment_yWL186.fcs exponential
# # 1Pat-07142023-Biosensors_cis-trans_TCA01_Experiment_50uM IAA
treatment_yWL209.fcs exponential
# # 1Pat-07142023-Biosensors_cis-trans_TCA01_Experiment_50uM IAA
treatment_yWL210.fcs exponential
# #
design
# # 1Pat-07142023-Biosensors_cis-trans_TCA01_Experiment_50uM IAA
treatment_yWL161.fcs TIR1 single-fusion
# # 1Pat-07142023-Biosensors_cis-trans_TCA01_Experiment_50uM IAA
treatment_yWL162.fcs AFB2 single-fusion
# # 1Pat-07142023-Biosensors_cis-trans_TCA01_Experiment_50uM IAA
treatment_yWL185.fcs TIR1 dual-fusion
# # 1Pat-07142023-Biosensors_cis-trans_TCA01_Experiment_50uM IAA
treatment_yWL186.fcs AFB2 dual-fusion
# # 1Pat-07142023-Biosensors_cis-trans_TCA01_Experiment_50uM IAA
treatment_yWL209.fcs TIR1 dual-fusion
# # 1Pat-07142023-Biosensors_cis-trans_TCA01_Experiment_50uM IAA
treatment_yWL210.fcs AFB2 dual-fusion
# #
yeast
# # 1Pat-07142023-Biosensors_cis-trans_TCA01_Experiment_50uM IAA
treatment_yWL161.fcs W303
# # 1Pat-07142023-Biosensors_cis-trans_TCA01_Experiment_50uM IAA
treatment_yWL162.fcs W303
# # 1Pat-07142023-Biosensors_cis-trans_TCA01_Experiment_50uM IAA
treatment_yWL185.fcs W303
# # 1Pat-07142023-Biosensors_cis-trans_TCA01_Experiment_50uM IAA
treatment_yWL186.fcs W303
# # 1Pat-07142023-Biosensors_cis-trans_TCA01_Experiment_50uM IAA
treatment_yWL209.fcs YPH499
# # 1Pat-07142023-Biosensors_cis-trans_TCA01_Experiment_50uM IAA
treatment_yWL210.fcs YPH499
# #
design_yeast
# # 1Pat-07142023-Biosensors_cis-trans_TCA01_Experiment_50uM IAA
treatment_yWL161.fcs TIR1 single-fusion (W303)
# # 1Pat-07142023-Biosensors_cis-trans_TCA01_Experiment_50uM IAA
treatment_yWL162.fcs AFB2 single-fusion (W303)
# # 1Pat-07142023-Biosensors_cis-trans_TCA01_Experiment_50uM IAA
treatment_yWL185.fcs TIR1 dual-fusion (W303)
# # 1Pat-07142023-Biosensors_cis-trans_TCA01_Experiment_50uM IAA
treatment_yWL186.fcs AFB2 dual-fusion (W303)
# # 1Pat-07142023-Biosensors_cis-trans_TCA01_Experiment_50uM IAA
treatment_yWL209.fcs TIR1 dual-fusion (YPH499)
# # 1Pat-07142023-Biosensors_cis-trans_TCA01_Experiment_50uM IAA
treatment_yWL210.fcs AFB2 dual-fusion (YPH499)
# #
receptor.1
# # 1Pat-07142023-Biosensors_cis-trans_TCA01_Experiment_50uM IAA

```

```

treatment_yWL161.fcs      TIR1
# # 1Pat-07142023-Biosensors_cis-trans_TCA01_Experiment_50uM IAA
treatment_yWL162.fcs      AFB2
# # 1Pat-07142023-Biosensors_cis-trans_TCA01_Experiment_50uM IAA
treatment_yWL185.fcs      TIR1
# # 1Pat-07142023-Biosensors_cis-trans_TCA01_Experiment_50uM IAA
treatment_yWL186.fcs      AFB2
# # 1Pat-07142023-Biosensors_cis-trans_TCA01_Experiment_50uM IAA
treatment_yWL209.fcs      TIR1
# # 1Pat-07142023-Biosensors_cis-trans_TCA01_Experiment_50uM IAA
treatment_yWL210.fcs      AFB2
# #
design_yeast_treatment
# # 1Pat-07142023-Biosensors_cis-trans_TCA01_Experiment_50uM IAA
treatment_yWL161.fcs TIR1 single-fusion (W303)-50uM IAA
# # 1Pat-07142023-Biosensors_cis-trans_TCA01_Experiment_50uM IAA
treatment_yWL162.fcs AFB2 single-fusion (W303)-50uM IAA
# # 1Pat-07142023-Biosensors_cis-trans_TCA01_Experiment_50uM IAA
treatment_yWL185.fcs TIR1 dual-fusion (W303)-50uM IAA
# # 1Pat-07142023-Biosensors_cis-trans_TCA01_Experiment_50uM IAA
treatment_yWL186.fcs AFB2 dual-fusion (W303)-50uM IAA
# # 1Pat-07142023-Biosensors_cis-trans_TCA01_Experiment_50uM IAA
treatment_yWL209.fcs TIR1 dual-fusion (YPH499)-50uM IAA
# # 1Pat-07142023-Biosensors_cis-trans_TCA01_Experiment_50uM IAA
treatment_yWL210.fcs AFB2 dual-fusion (YPH499)-50uM IAA

```

####Figure 5C and Supporting Figure S5: Comparison of biosensor designs in different yeast strains, before and after the treatments

```

#Color codes: Venus #f7cb44b2, mScarlet #b8627db2, ratio #593d9cb2, control
#042333b2

```

```

plate_07142023_3readsbefore_after <-
summarizeFlow(aplate_07142023_3readsbefore_after, channel = c("BL1.A",
"YL1.A"), gated = TRUE)
# # [1] "Summarizing all events..."

plate_07142023_3readsbefore_after$treatment <-
factor(plate_07142023_3readsbefore_after$treatment, levels = c("control",
"50uM IAA"))
plate_07142023_3readsbefore_after$before_after <-
factor(plate_07142023_3readsbefore_after$before_after, levels = c("before",
"after"))

boxRatio_expo3reads_norm <- ggplot(plate_07142023_3readsbefore_after,
aes(x=before_after, y=(BL1.Amean/mean(BL1.Amean))/
(YL1.Amean/mean(YL1.Amean)), fill=treatment, shape = treatment)) +
geom_boxplot() +

```

```

scale_color_manual(values=c("#b8627dff", "#6b4596ff")) +
scale_fill_manual(values=c("#b8627dff", "#6b4596ff")) +
geom_jitter(aes(color=treatment),
position=position_jitterdodge(jitter.width = 0.1, dodge.width = 0.7)) +
theme_classic() +
theme(legend.position = "bottom", panel.grid.major = element_line(size =
0.3, linetype = 'solid', colour = "white"), panel.grid.minor =
element_line(size = 0.3, linetype = 'solid', colour = "white"), axis.text.x =
element_text(size=10, angle=0), axis.title = element_text(face="bold", size =
12), legend.text = element_text(size = 10)) +
facet_wrap(~factor(design_yeast, c("AFB2 dual-fusion (W303)", "AFB2 dual-
fusion (YPH499)", "AFB2 single-fusion (W303)", "TIR1 dual-fusion (W303)",
"TIR1 dual-fusion (YPH499)", "TIR1 single-fusion (W303)")), scales =
"free_y") + xlab("Treatment") + ylab("Normalized Venus/mScarlet-I") +
stat_compare_means(method = "t.test", label = "p.format", hide.ns = FALSE,
size = 3.5, label.y = 0.43) +
labs(fill = "Treatment", color = "Treatment", shape = "Treatment")

```

boxRatio\_expo3reads\_norm

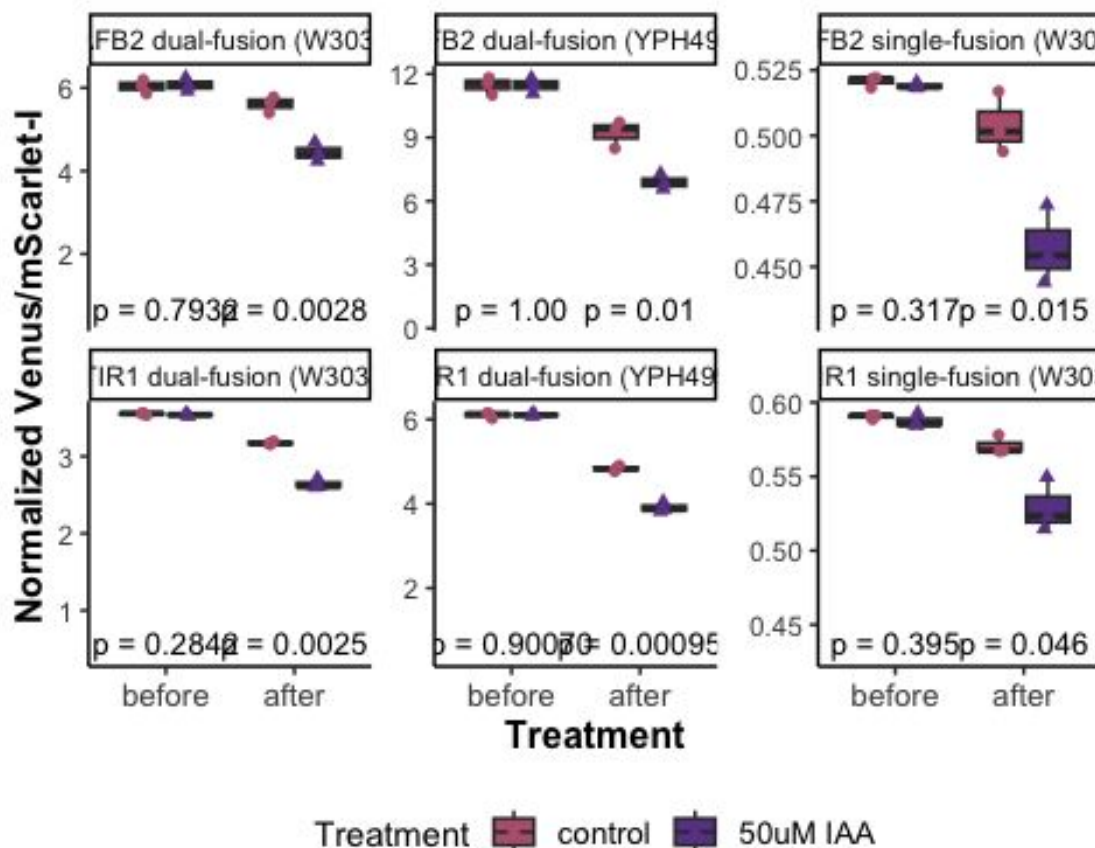

```

#ggsave("boxRatio_expo3reads_norm.png", width = 6, height = 5)

```

```

boxRatio_expo3reads_norm_afteronly <-
ggplot(subset(plate_07142023_3readsbefore_after, before_after == "after"),
aes(x=design_yeast, y=(BL1.Amean/mean(BL1.Amean))/
(YL1.Amean/mean(YL1.Amean))/15, fill=treatment, shape = treatment)) +
geom_boxplot() + scale_fill_manual(values=c("#b8627dff", "#6b4596ff")) +
scale_color_manual(values=c("#b8627dff", "#6b4596ff")) +
geom_jitter(aes(color=treatment), position=position_jitterdodge(jitter.width
= 0.1, dodge.width = 0.7), size = 4)+ theme_classic() + theme(legend.position
= c(0.9, 0.7), axis.title.y = element_text(face="bold", size = 12),
axis.title.x = element_text(face="bold", size = 12), axis.text.y =
element_text(size = 9),axis.text.x = element_text(size = 9),
legend.title=element_text(size=10, face = "bold"),
legend.text=element_text(size=10), legend.background =
element_rect(fill="#E2D9E6", size=0.5, linetype="solid")) +
  xlab("Biosensor designs (strains)") + ylab("Normalized Venus/mScarlet-I")
+
  scale_x_discrete(labels=c(
    "AFB2 dual-fusion (W303)" = "AFB2\ndual-fusion\n(W303)",
    "AFB2 dual-fusion (YPH499)" = "AFB2\ndual-fusion\n(YPH499)",
    "AFB2 single-fusion (W303)" = "AFB2\nsingle-fusion\n(W303)",
    "TIR1 dual-fusion (W303)" = "TIR1\ndual-fusion\n(W303)",
    "TIR1 dual-fusion (YPH499)" = "TIR1\ndual-fusion\n(YPH499)",
    "TIR1 single-fusion (W303)" = "TIR1\nsingle-fusion\n(W303)")) +
  #annotate(geom="text", x=1, y=15, label="p=0.046") + annotate(geom="text",
x=2, y=15, label="p=0.046") + annotate(geom="text", x=3, y=15,
label="p=0.0025")+ annotate(geom="text", x=4, y=15, label="p=0.0028")+
annotate(geom="text", x=5, y=15, label="p=0.00095")+ annotate(geom="text",
x=6, y=15, label="p=0.01") +
  stat_compare_means(method = "t.test", label = "..p.format..", hide.ns =
TRUE, size = 4, label.y = 0.68)

  #geom_signif(comparisons = list(c("compact", "midsize"), c("minivan",
"suv")), map_signif_level = TRUE, textsize=10, family="serif")
boxRatio_expo3reads_norm_afteronly

```

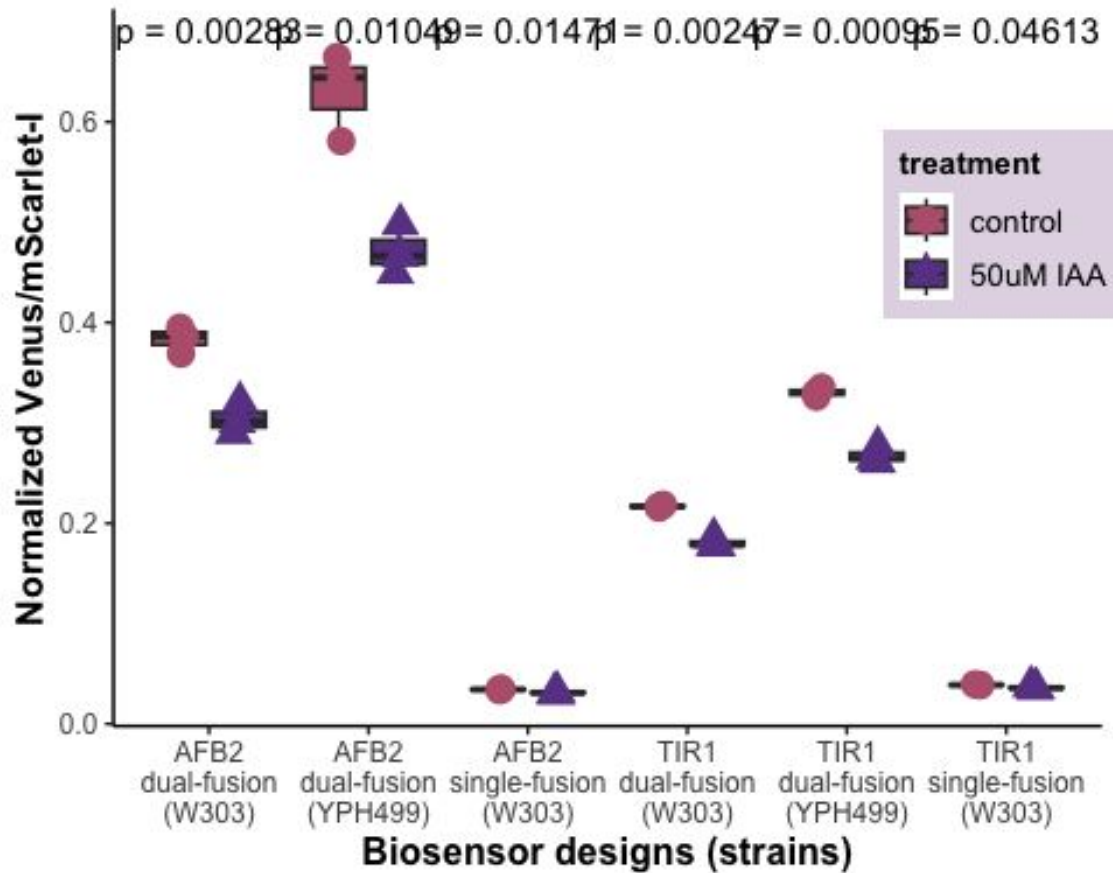

```
#ggsave("Supplement4.pdf", width = 8, height = 5)
```

**Figure 5B: Foldchange between the 50  $\mu$ M auxin treatment and solvent control for each biosensor design**

```
plate_07142023_3readsbefore_after <- plate_07142023_3readsbefore_after %>%
  dplyr::filter(before_after == "after") %>%
  mutate(Ratio = BL1.Amean/YL1.Amean) %>%
  group_by(design, yeast) %>%
  mutate(foldchange_treatment = (mean(Ratio[treatment == "control"]) -
Ratio)/mean(Ratio[treatment ==
  "control"])))

fc <- ggplot(plate_07142023_3readsbefore_after |>
  dplyr::filter(treatment != "control"), aes(x = factor(design_yeast), y =
foldchange_treatment,
  fill = design_yeast, colour = design_yeast)) + geom_boxplot(alpha = 0.9)
+ scale_fill_manual(values = c("#593d9cff",
  "#7e4e90ff", "#a65c85ff", "#cc6a70ff", "#eb8055ff", "#f9a242ff",
"#f7cb44ff")) +
```

```

scale_color_manual(values = c("#593d9cff", "#7e4e90ff", "#a65c85ff",
"#cc6a70ff",
"#eb8055ff", "#f9a242ff", "#f7cb44ff")) + theme_classic() +
theme(axis.title.y = element_text(face = "bold",
size = 12), axis.title.x = element_text(face = "bold", size = 12),
axis.text.y = element_text(size = 10),
axis.text.x = element_text(size = 9), legend.title = element_text(size =
12,
face = "bold"), legend.text = element_text(size = 12),
legend.position = "none") +
xlab("Biosensor designs (strains)") + ylab("Fold Change") +
scale_x_discrete(labels = c(`AFB2 dual-fusion (W303)` = "AFB2\ndual-
fusion\n(W303)",
`AFB2 dual-fusion (YPH499)` = "AFB2\ndual-fusion\n(YPH499)", `AFB2
single-fusion (W303)` = "AFB2\nsingle-fusion\n(W303)",
`TIR1 dual-fusion (W303)` = "TIR1\ndual-fusion\n(W303)", `TIR1 dual-
fusion (YPH499)` = "TIR1\ndual-fusion\n(YPH499)",
`TIR1 single-fusion (W303)` = "TIR1\nsingle-fusion\n(W303)"))
fc

```

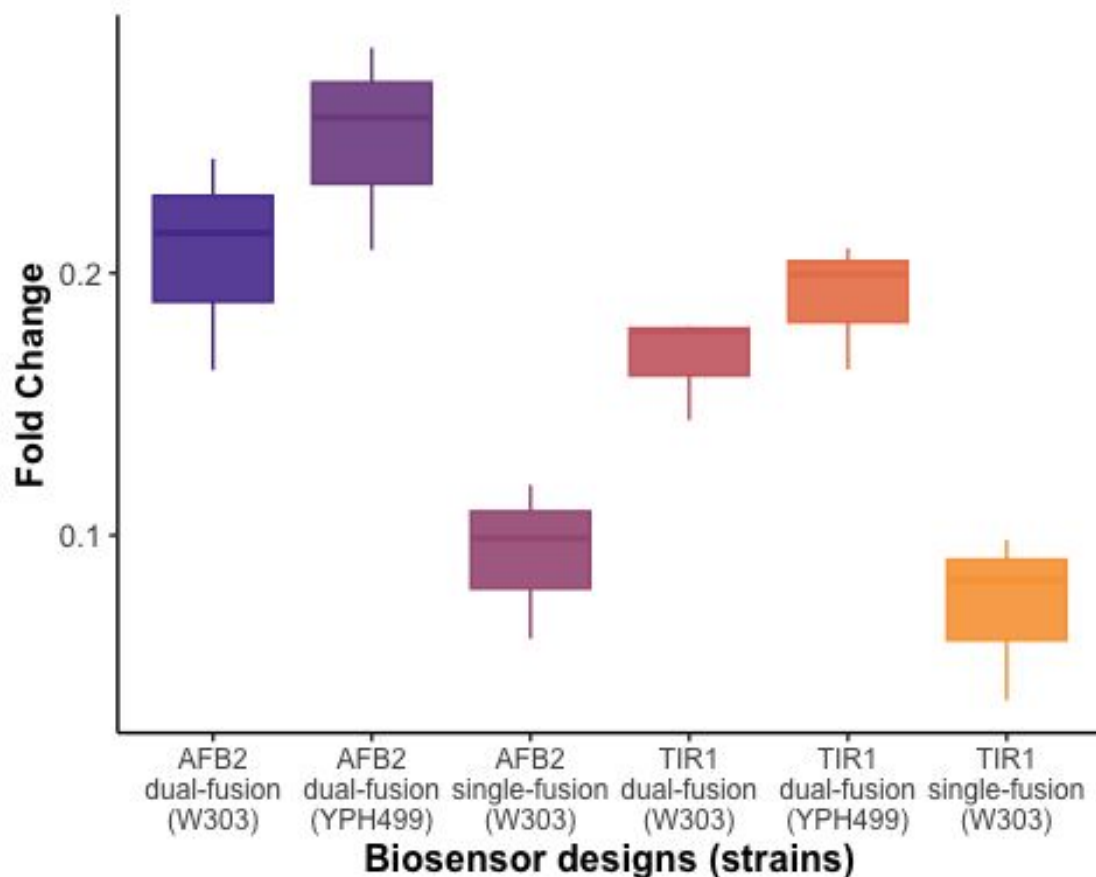

```

fig5AB <- ggarrange(norm_ratio, fc, ncol = 1, nrow = 2, labels = c("A", "B"),
  heights = c(1,
    0.7))
# fig5AB

fig5C <- ggarrange(boxRatio_expo3reads_norm, ncol = 1, nrow = 1, labels =
  c("C"))
# fig5C

fig5ABC <- ggarrange(fig5AB, fig5C, nrow = 1, ncol = 2, widths = c(0.8, 1))
fig5ABC

```

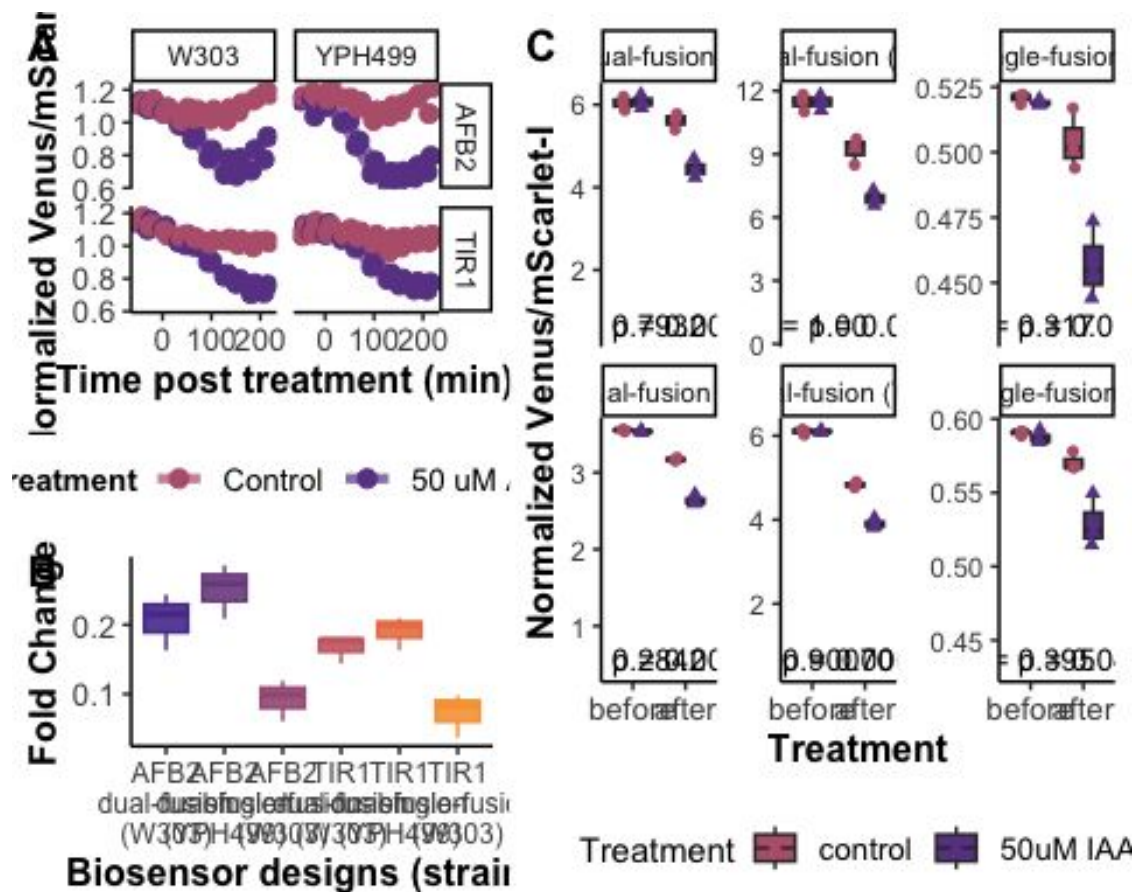

```
# ggsave('Figure5.png', width = 11, height = 6.5)
```

Supporting Figure S6: Auxin dose-response assay measured by the AFB2 dual-fusion biosensor

```

plate_08052022 <- read.plateSet(path = "Data for
publication/08052022_yWL210_DRA-LCMS-R2/Alldata/",
  pattern = "DRA*")

```



```

annotation <- createAnnotation(yourFlowSet = plate_08052022)
write.csv(annotation, "Data for publication/08052022_yWL210_DRA-LCMS-
R2/08052022_alldata_annotation.csv")

annotation <- read.csv("Data for publication/08052022_yWL210_DRA-LCMS-
R2/08052022_alldata_annotation.csv")

aplate_08052022 <- annotateFlowSet(yourFlowSet = plate_08052022,
annotation_df = annotation,
mergeBy = "name")
head(rownames(pData(aplate_08052022)))
# # [1] "1Pat-08052022-Biosensor_LCMS_rep2-DRA01_DRA-LCMS-R2_Exponential_0
uM.fcs"
# # [2] "1Pat-08052022-Biosensor_LCMS_rep2-DRA01_DRA-LCMS-
R2_Exponential_0.0064 uM.fcs"
# # [3] "1Pat-08052022-Biosensor_LCMS_rep2-DRA01_DRA-LCMS-
R2_Exponential_0.032 uM.fcs"
# # [4] "1Pat-08052022-Biosensor_LCMS_rep2-DRA01_DRA-LCMS-R2_Exponential_0.16
uM.fcs"
# # [5] "1Pat-08052022-Biosensor_LCMS_rep2-DRA01_DRA-LCMS-R2_Exponential_0.8
uM.fcs"
# # [6] "1Pat-08052022-Biosensor_LCMS_rep2-DRA01_DRA-LCMS-R2_Exponential_100
uM.fcs"
head(pData(aplate_08052022))
# #
name
# # 1Pat-08052022-Biosensor_LCMS_rep2-DRA01_DRA-LCMS-R2_Exponential_0 uM.fcs
1Pat-08052022-Biosensor_LCMS_rep2-DRA01_DRA-LCMS-R2_Exponential_0 uM.fcs
# # 1Pat-08052022-Biosensor_LCMS_rep2-DRA01_DRA-LCMS-R2_Exponential_0.0064
uM.fcs 1Pat-08052022-Biosensor_LCMS_rep2-DRA01_DRA-LCMS-R2_Exponential_0.0064
uM.fcs
# # 1Pat-08052022-Biosensor_LCMS_rep2-DRA01_DRA-LCMS-R2_Exponential_0.032
uM.fcs 1Pat-08052022-Biosensor_LCMS_rep2-DRA01_DRA-LCMS-
R2_Exponential_0.032 uM.fcs
# # 1Pat-08052022-Biosensor_LCMS_rep2-DRA01_DRA-LCMS-R2_Exponential_0.16
uM.fcs 1Pat-08052022-Biosensor_LCMS_rep2-DRA01_DRA-LCMS-
R2_Exponential_0.16 uM.fcs
# # 1Pat-08052022-Biosensor_LCMS_rep2-DRA01_DRA-LCMS-R2_Exponential_0.8
uM.fcs 1Pat-08052022-Biosensor_LCMS_rep2-DRA01_DRA-LCMS-
R2_Exponential_0.8 uM.fcs
# # 1Pat-08052022-Biosensor_LCMS_rep2-DRA01_DRA-LCMS-R2_Exponential_100
uM.fcs 1Pat-08052022-Biosensor_LCMS_rep2-DRA01_DRA-LCMS-
R2_Exponential_100 uM.fcs
# #
folder
# # 1Pat-08052022-Biosensor_LCMS_rep2-DRA01_DRA-LCMS-R2_Exponential_0 uM.fcs
DRA01
# # 1Pat-08052022-Biosensor_LCMS_rep2-DRA01_DRA-LCMS-R2_Exponential_0.0064
uM.fcs DRA01
# # 1Pat-08052022-Biosensor_LCMS_rep2-DRA01_DRA-LCMS-R2_Exponential_0.032

```

```

uM.fcs  DRA01
# # 1Pat-08052022-Biosensor_LCMS_rep2-DRA01_DRA-LCMS-R2_Exponential_0.16
uM.fcs  DRA01
# # 1Pat-08052022-Biosensor_LCMS_rep2-DRA01_DRA-LCMS-R2_Exponential_0.8
uM.fcs  DRA01
# # 1Pat-08052022-Biosensor_LCMS_rep2-DRA01_DRA-LCMS-R2_Exponential_100
uM.fcs  DRA01
# #
X
# # 1Pat-08052022-Biosensor_LCMS_rep2-DRA01_DRA-LCMS-R2_Exponential_0 uM.fcs
1
# # 1Pat-08052022-Biosensor_LCMS_rep2-DRA01_DRA-LCMS-R2_Exponential_0.0064
uM.fcs 2
# # 1Pat-08052022-Biosensor_LCMS_rep2-DRA01_DRA-LCMS-R2_Exponential_0.032
uM.fcs 3
# # 1Pat-08052022-Biosensor_LCMS_rep2-DRA01_DRA-LCMS-R2_Exponential_0.16
uM.fcs 4
# # 1Pat-08052022-Biosensor_LCMS_rep2-DRA01_DRA-LCMS-R2_Exponential_0.8
uM.fcs 5
# # 1Pat-08052022-Biosensor_LCMS_rep2-DRA01_DRA-LCMS-R2_Exponential_100
uM.fcs 6
# #
treatment
# # 1Pat-08052022-Biosensor_LCMS_rep2-DRA01_DRA-LCMS-R2_Exponential_0 uM.fcs
0 uM
# # 1Pat-08052022-Biosensor_LCMS_rep2-DRA01_DRA-LCMS-R2_Exponential_0.0064
uM.fcs 0.0064 uM
# # 1Pat-08052022-Biosensor_LCMS_rep2-DRA01_DRA-LCMS-R2_Exponential_0.032
uM.fcs 0.032 uM
# # 1Pat-08052022-Biosensor_LCMS_rep2-DRA01_DRA-LCMS-R2_Exponential_0.16
uM.fcs 0.16 uM
# # 1Pat-08052022-Biosensor_LCMS_rep2-DRA01_DRA-LCMS-R2_Exponential_0.8
uM.fcs 0.8 uM
# # 1Pat-08052022-Biosensor_LCMS_rep2-DRA01_DRA-LCMS-R2_Exponential_100
uM.fcs 100 uM
# #
reading
# # 1Pat-08052022-Biosensor_LCMS_rep2-DRA01_DRA-LCMS-R2_Exponential_0 uM.fcs
1
# # 1Pat-08052022-Biosensor_LCMS_rep2-DRA01_DRA-LCMS-R2_Exponential_0.0064
uM.fcs 1
# # 1Pat-08052022-Biosensor_LCMS_rep2-DRA01_DRA-LCMS-R2_Exponential_0.032
uM.fcs 1
# # 1Pat-08052022-Biosensor_LCMS_rep2-DRA01_DRA-LCMS-R2_Exponential_0.16
uM.fcs 1
# # 1Pat-08052022-Biosensor_LCMS_rep2-DRA01_DRA-LCMS-R2_Exponential_0.8
uM.fcs 1
# # 1Pat-08052022-Biosensor_LCMS_rep2-DRA01_DRA-LCMS-R2_Exponential_100
uM.fcs 1
# #

```

```

dose
# # 1Pat-08052022-Biosensor_LCMS_rep2-DRA01_DRA-LCMS-R2_Exponential_0 uM.fcs
0.0e+00
# # 1Pat-08052022-Biosensor_LCMS_rep2-DRA01_DRA-LCMS-R2_Exponential_0.0064
uM.fcs 6.4e-03
# # 1Pat-08052022-Biosensor_LCMS_rep2-DRA01_DRA-LCMS-R2_Exponential_0.032
uM.fcs 3.2e-02
# # 1Pat-08052022-Biosensor_LCMS_rep2-DRA01_DRA-LCMS-R2_Exponential_0.16
uM.fcs 1.6e-01
# # 1Pat-08052022-Biosensor_LCMS_rep2-DRA01_DRA-LCMS-R2_Exponential_0.8
uM.fcs 8.0e-01
# # 1Pat-08052022-Biosensor_LCMS_rep2-DRA01_DRA-LCMS-R2_Exponential_100
uM.fcs 1.0e+02
# #
collection
# # 1Pat-08052022-Biosensor_LCMS_rep2-DRA01_DRA-LCMS-R2_Exponential_0 uM.fcs
end
# # 1Pat-08052022-Biosensor_LCMS_rep2-DRA01_DRA-LCMS-R2_Exponential_0.0064
uM.fcs end
# # 1Pat-08052022-Biosensor_LCMS_rep2-DRA01_DRA-LCMS-R2_Exponential_0.032
uM.fcs end
# # 1Pat-08052022-Biosensor_LCMS_rep2-DRA01_DRA-LCMS-R2_Exponential_0.16
uM.fcs end
# # 1Pat-08052022-Biosensor_LCMS_rep2-DRA01_DRA-LCMS-R2_Exponential_0.8
uM.fcs end
# # 1Pat-08052022-Biosensor_LCMS_rep2-DRA01_DRA-LCMS-R2_Exponential_100
uM.fcs end
# #
before_after
# # 1Pat-08052022-Biosensor_LCMS_rep2-DRA01_DRA-LCMS-R2_Exponential_0 uM.fcs
before
# # 1Pat-08052022-Biosensor_LCMS_rep2-DRA01_DRA-LCMS-R2_Exponential_0.0064
uM.fcs before
# # 1Pat-08052022-Biosensor_LCMS_rep2-DRA01_DRA-LCMS-R2_Exponential_0.032
uM.fcs before
# # 1Pat-08052022-Biosensor_LCMS_rep2-DRA01_DRA-LCMS-R2_Exponential_0.16
uM.fcs before
# # 1Pat-08052022-Biosensor_LCMS_rep2-DRA01_DRA-LCMS-R2_Exponential_0.8
uM.fcs before
# # 1Pat-08052022-Biosensor_LCMS_rep2-DRA01_DRA-LCMS-R2_Exponential_100
uM.fcs before

plate_08052022_sum <- summarizeFlow(aplate_08052022, channel = c("BL1.A",
"YL1.A"),
gated = TRUE)
# # [1] "Summarizing all events..."

# dat_sumGr_08052022 <- summarizeFlow(aplate_08052022, gated = TRUE, channel
=
# 'BL1.A')

```

```

# pulling data of Red fluorescent dat_sumRd_08052022 <-
# summarizeFlow(plate_08052022, gated = TRUE, channel = 'YL1.A')

# dat_sumGr_08052022$YL1.Amean <- dat_sumRd_08052022$YL1.Amean

# Levels(plate_08052022_sum$dose) plate_08052022_sum$dose <-
# factor(plate_08052022_sum$dose, levels = c('0 uM', '0.0064 uM', '0.032 uM',
# '0.16 uM', '0.8 uM', '4 uM', '20 uM', '100 uM'))

scurve <- ggplot(data = plate_08052022_sum, color = factor(reading), aes(x =
as.numeric(str_remove(treatment,
" uM")), y = YL1.Amean/BL1.Amean)) + geom_point(aes(color = reading),
size = 3,
shape = 19) + xlab("Dose of Auxin ( $\mu$ M)") + ylab("mScarlet-I/Venus") +
scale_x_log10(labels = scales::number) +
theme_classic() + theme(axis.title = element_text(size = 12, face =
"bold"),
axis.text = element_text(size = 10), legend.title = element_text(size =
10),
legend.text = element_text(size = 10), legend.position = "bottom") +
scale_color_viridis_c(option = "plasma",
alpha = 0.7, begin = 0, end = 0.8)

scurve

```

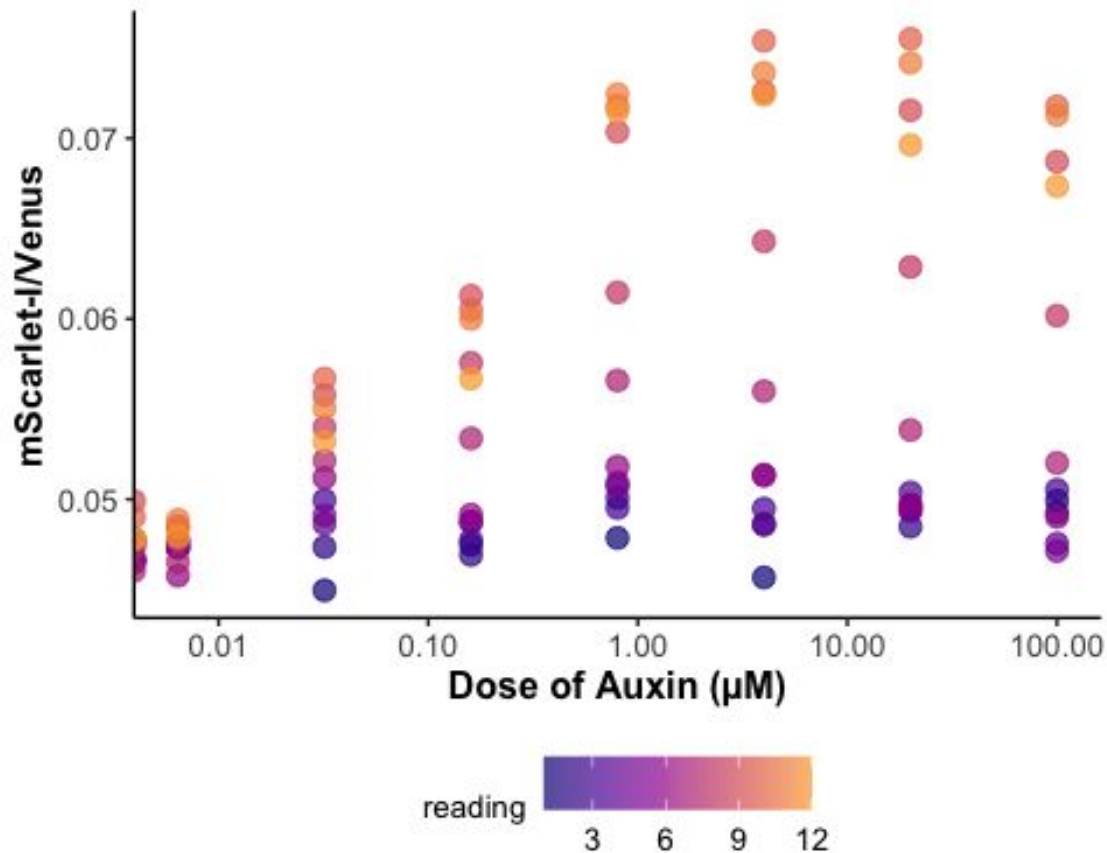

```
ratio080522_wrapread <- ggplot(data = plate_08052022_sum, color =
factor(reading),
  aes(x = as.numeric(str_remove(treatment, " uM")), y =
YL1.Amean/BL1.Amean)) +
  geom_point(aes(color = reading), size = 3, shape = 19) +
geom_line(aes(color = reading),
  size = 2) + xlab("Dose of Auxin (µM)") + ylab("mScarlet-I/Venus") +
scale_x_log10(labels = scales::number) +
  facet_wrap(~reading) + scale_color_viridis_c(option = "plasma", alpha =
0.7,
  begin = 0, end = 0.8) + theme_classic() + theme(axis.title =
element_text(size = 12,
  face = "bold"), axis.text = element_text(size = 10), axis.text.x =
element_text(angle = 90),
  legend.title = element_text(size = 10), legend.text = element_text(size =
10),
  legend.position = "none")
ratio080522_wrapread
```

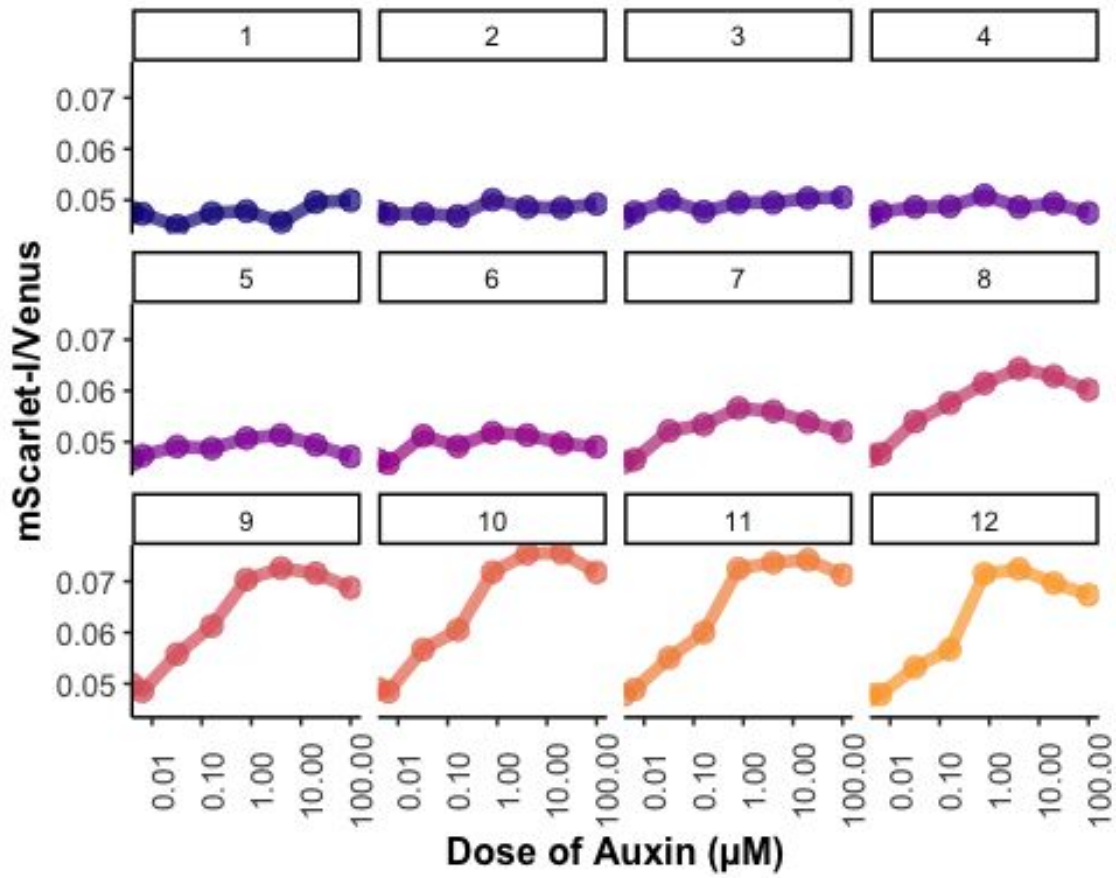

```

DRApplot <- ggarrange(scurve, ratio080522_wrapread, labels = c("A", "B"), nrow
= 1,
  ncol = 2)
DRApplot

```

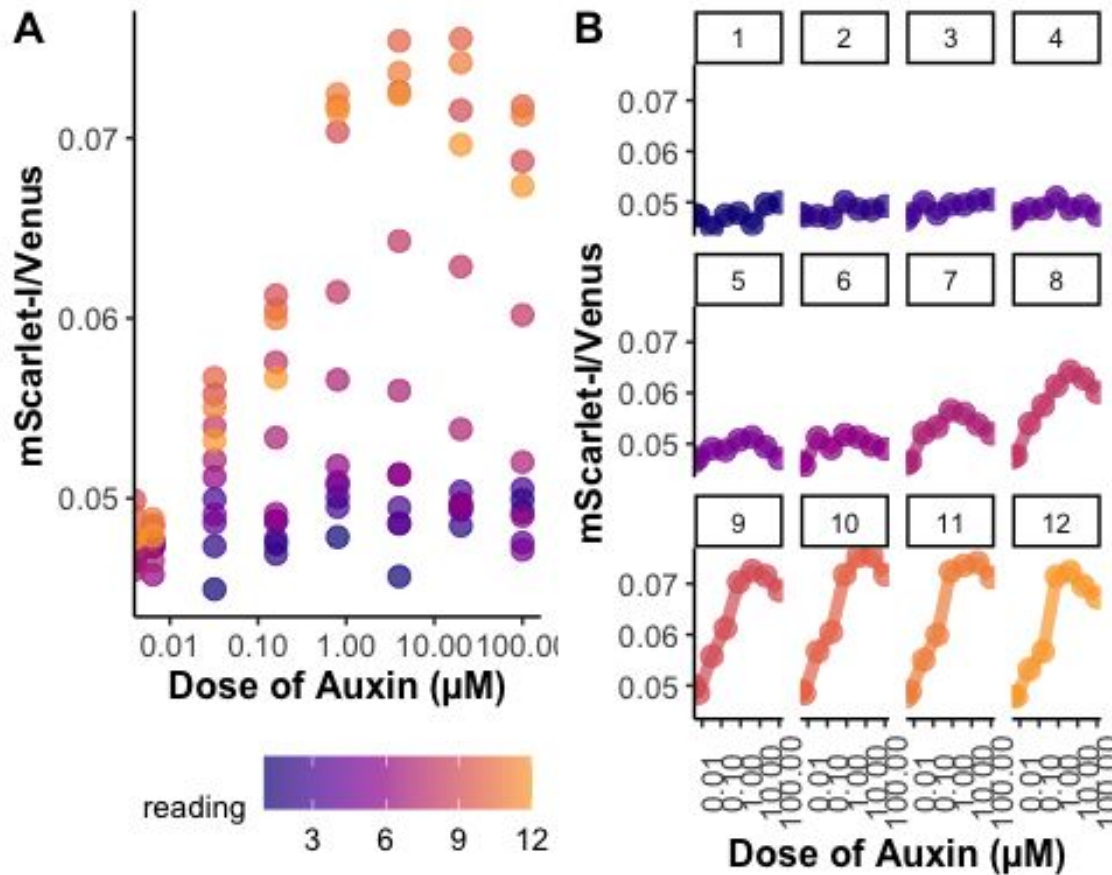

```
# ggsave('Supplement5.pdf',width = 9, height = 4)
```

Figure 6: Dose-response models of biosensors

```
library(tidyverse)
library(drc)

model.LL4_08052022 <- drm(YL1.Amean/BL1.Amean ~ dose, data =
subset(plate_08052022_sum,
  reading == "10"), fct = LL.4(names = c("Slope", "Lower Limit", "Upper
Limit",
  "ED50"))))

plot(model.LL4_08052022, type = "all", col = "black", lty = 1, lwd = 3, xlab =
"Extracellular concentrations of IAA (uM)",
  ylab = "mScarlet-I/Venus Ratio")

reading10_08052022 <- drm(YL1.Amean/BL1.Amean ~ dose, data =
subset(plate_08052022_sum,
  reading == "10"), fct = LL.4())
```

```
plot(reading10_08052022, broken = TRUE, add = TRUE, type = "none", col = 2,
lty = 2)
```

```
## Add confidence region for the models.
```

```
plot(reading10_08052022, broken = TRUE, type = "confidence", col = "blue",
add = TRUE)
```

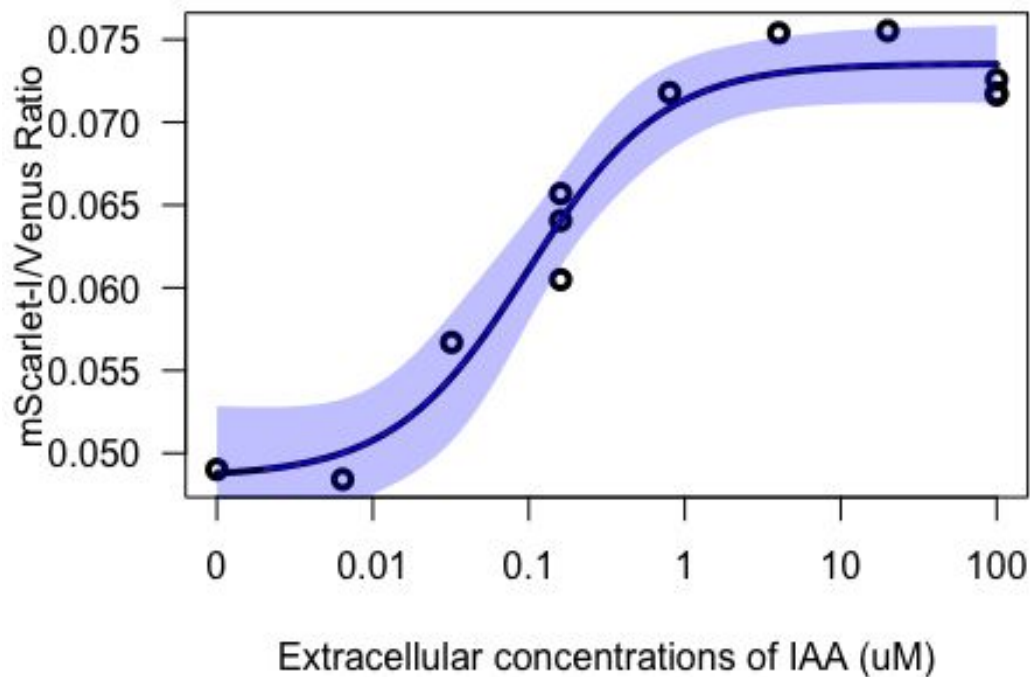

```
pm_08052022 <- expand.grid(treatment = exp(seq(log(0.001), log(100), length =
1000)))
```

```
pm_08052022 <- cbind(pm_08052022, predict(model.LL4_08052022, newdata =
pm_08052022,
interval = "confidence"))
```

```
DRApIot_08052022 <- ggplot(data = subset(plate_08052022_sum, reading ==
"10"), aes(x = dose,
y = YL1.Amean/BL1.Amean)) + scale_x_log10() + geom_ribbon(data =
pm_08052022,
aes(x = treatment, y = Prediction, ymin = Lower, ymax = Upper), alpha =
0.4) +
```



```

geom_line(data = pm_08052022, aes(x = treatment, y = Prediction), size =
1.2) +
  xlab("Auxin Treatment ( $\mu$ M)") + ylab("mScarlet-I/Venus") + scale_x_log10()
+
  geom_point(size = 4, color = "#403891b2") + theme_classic() +
theme(legend.position = "none",
  axis.title.y = element_text(size = 20, face = "bold"), axis.title.x =
element_text(size = 20,
  face = "bold"), axis.text = element_text(size = 18), legend.title =
element_text(size = 18,
  face = "bold"), legend.text = element_text(size = 18)) +
scale_y_continuous(breaks = seq(0,
  0.14, 0.01))
## Scale for x is already present.
## Adding another scale for x, which will replace the existing scale.

```

DRApilot\_08052022

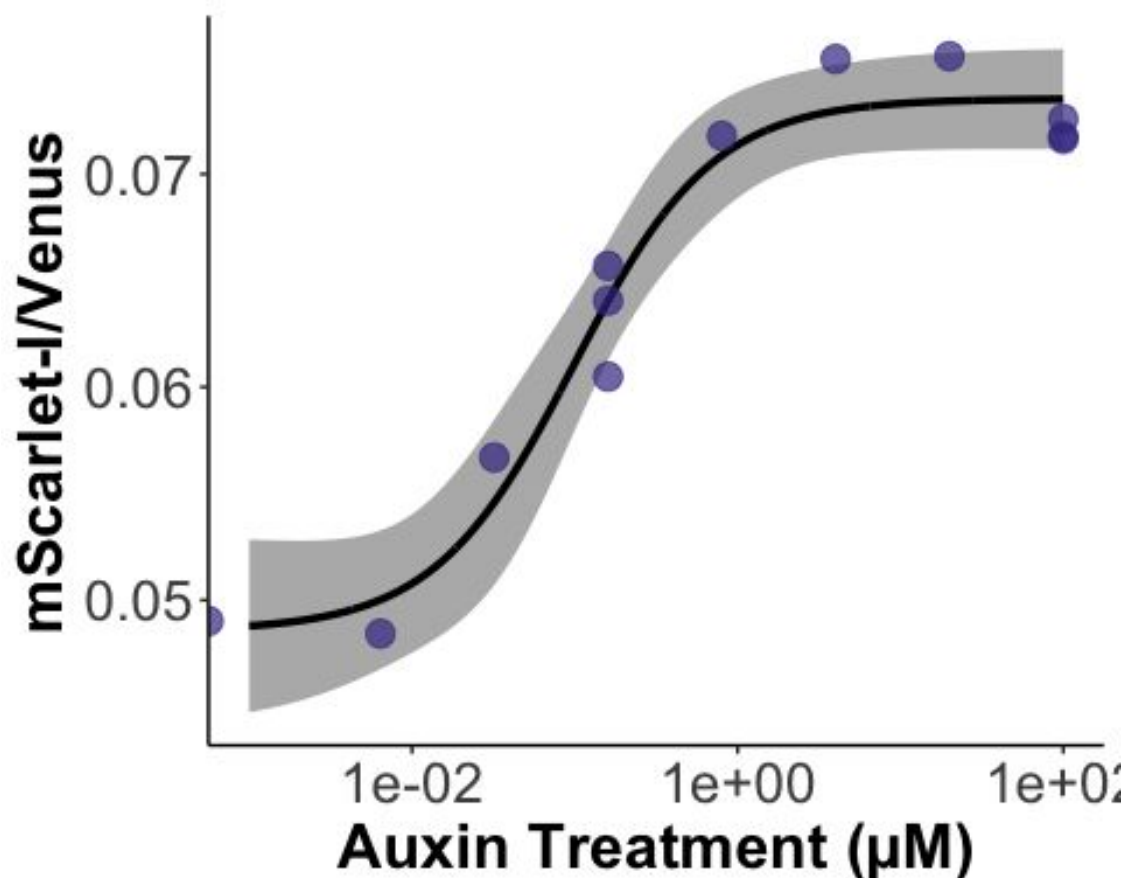

Figure 7: Auxin quantification by AFB2 dual-fusion Biosensor vs LC-MS

```

lcms_data <- read_csv("Data for publication/LCMS_data_forplot.csv")
## New names:

```

```

## Rows: 14 Columns: 13
## — Column specification
## _____ Delimiter: ","
chr
## (3): Sample, dilution, experiment dbl (10): ...1, Observe_IAA_in_uM,
## peak_response, Dose_IAA, set, Green, Red,...
## i Use `spec()` to retrieve the full column specification for this data. i
## Specify the column types or set `show_col_types = FALSE` to quiet this
message.
## • `` -> `...1`

```

## Model intracellular concentration versus dose of auxin

Begin with a 4-parameter log-logistic model

```

intra_dose4 <- drm(Observe_IAA_in_uM ~ Dose_IAA, data = lcms_data, fct =
LL.4())
summary(intra_dose4)
##
## Model fitted: Log-Logistic (ED50 as parameter) (4 parms)
##
## Parameter estimates:
##
##           Estimate Std. Error t-value p-value
## b:(Intercept) -5.9718e-01  1.3912e-01 -4.2925 0.00158 **
## c:(Intercept)  6.8864e-02  4.6432e-01  0.1483 0.88505
## d:(Intercept)  9.3514e+01  1.9575e+02  0.4777 0.64311
## e:(Intercept)  1.3879e+04  6.1640e+04  0.2252 0.82639
## ---
## Signif. codes:  0 '***' 0.001 '**' 0.01 '*' 0.05 '.' 0.1 ' ' 1
##
## Residual standard error:
##
## 1.120679 (10 degrees of freedom)
plot(intra_dose4)

```

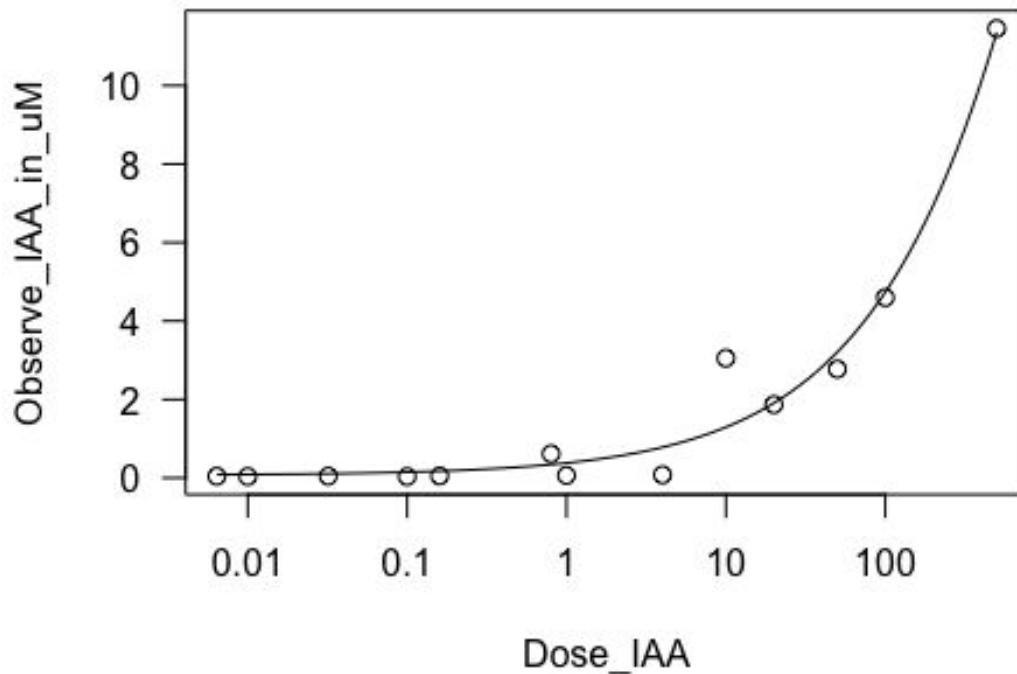

Compare other model forms

```
mselect(intra_dose4, list(LL2.4(), LL.5(), LL2.5(), LL.3(), lnormal(),
L.4()), linreg = TRUE,
  icfct = BIC)
```

| # #         | LogLik    | IC       | Lack of fit | Res var  |
|-------------|-----------|----------|-------------|----------|
| # # LL.3    | -19.09453 | 48.74528 | 0.9990355   | 1.140053 |
| # # Quad    | -20.17634 | 50.90891 | NA          | 1.330585 |
| # # LL2.4   | -19.06996 | 51.33521 | 0.9982747   | 1.249665 |
| # # LL.4    | -19.10492 | 51.40512 | 0.9981866   | 1.255921 |
| # # lnormal | -19.56407 | 52.32342 | 0.9967209   | 1.341062 |
| # # Cubic   | -19.61321 | 52.42170 | NA          | 1.350510 |
| # # LL2.5   | -19.03771 | 53.90976 | 0.9969071   | 1.382133 |
| # # L.4     | -20.35741 | 53.91010 | 0.9925932   | 1.501998 |
| # # LL.5    | -19.16546 | 54.16526 | 0.9963648   | 1.407589 |
| # # Lin     | -23.34430 | 54.60577 | NA          | 1.917790 |

While a 3-parameter log-logistic model has the lowest value of AIC it does assume that the intracellular auxin concentration goes to zero when extracellular auxin is zero, which we and others have shown to not be true. Therefore we will use the 4-parameter log-logistic model as hypothesized but with a slight change in parameterization.

```

intra_dose <- drm(Observe_IAA_in_uM ~ Dose_IAA, data = lcms_data, fct =
LL2.4())
summary(intra_dose)
# #
# # Model fitted: Log-logistic (log(ED50) as parameter) (4 parms)
# #
# # Parameter estimates:
# #
# #           Estimate Std. Error t-value  p-value
# # b:(Intercept) -0.573353   0.152571 -3.7580 0.003735 **
# # c:(Intercept)  0.050624   0.476907  0.1062 0.917562
# # d:(Intercept) 175.849512 780.660654  0.2253 0.826316
# # e:(Intercept) 10.885508   9.140423  1.1909 0.261186
# # ---
# # Signif. codes:  0 '***' 0.001 '**' 0.01 '*' 0.05 '.' 0.1 ' ' 1
# #
# # Residual standard error:
# #
# # 1.117884 (10 degrees of freedom)
plot(intra_dose)

```

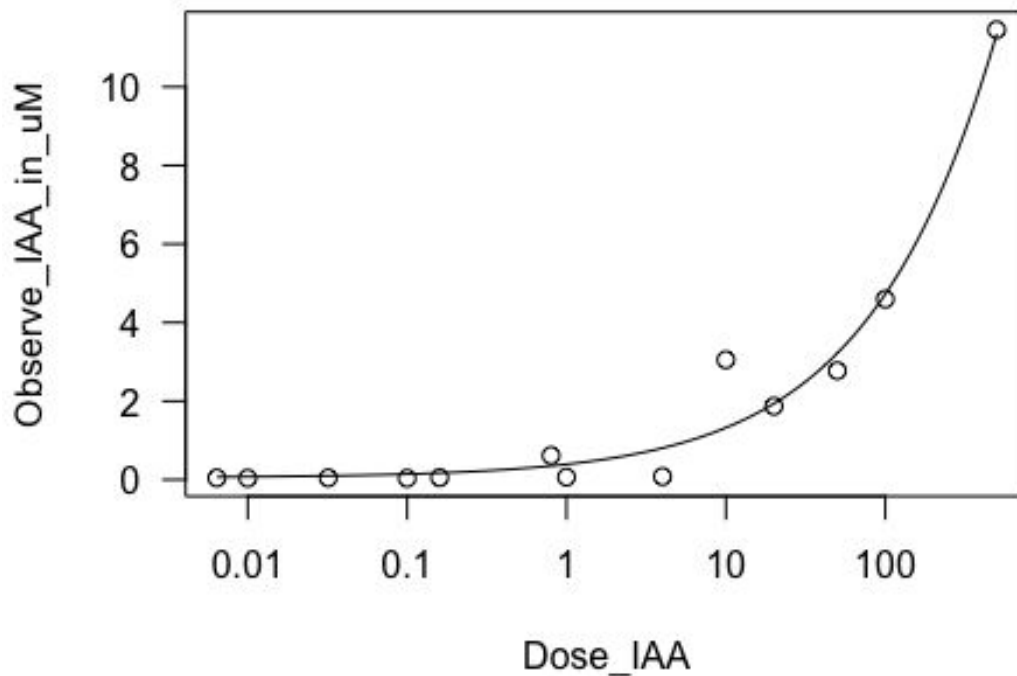

```

# predictions and confidence intervals.
intra_dose.pred <- expand.grid(conc = exp(seq(log(max(lcms_data$Dose_IAA))),

```

```

log(min(lcms_data$Dose_IAA),
     length = 100)))
# new data with predictions
pm <- predict(intra_dose, newdata = intra_dose.pred, interval = "confidence")
intra_dose.pred$p <- pm[, 1]
intra_dose.pred$pmin <- pm[, 2]
intra_dose.pred$pmax <- pm[, 3]

ggplot(data = lcms_data, mapping = aes(x = Dose_IAA, y = Observe_IAA_in_uM,
color = experiment)) +
  geom_point(alpha = 0.5) + geom_ribbon(data = intra_dose.pred, aes(x =
conc, y = p,
  ymin = pmin, ymax = pmax), alpha = 0.2, inherit.aes = FALSE) +
geom_line(data = intra_dose.pred,
  aes(x = conc, y = p), inherit.aes = FALSE) + scale_x_log10() +
guides(color = "none") +
  labs(x = "Exogenous auxin ( $\mu\text{M}$ )", y = "Intracellular\nauxin ( $\mu\text{M}$ )") +
scale_color_viridis_d(begin = 0.3,
  end = 0.6, option = "plasma") -> intra_dose
intra_dose

```

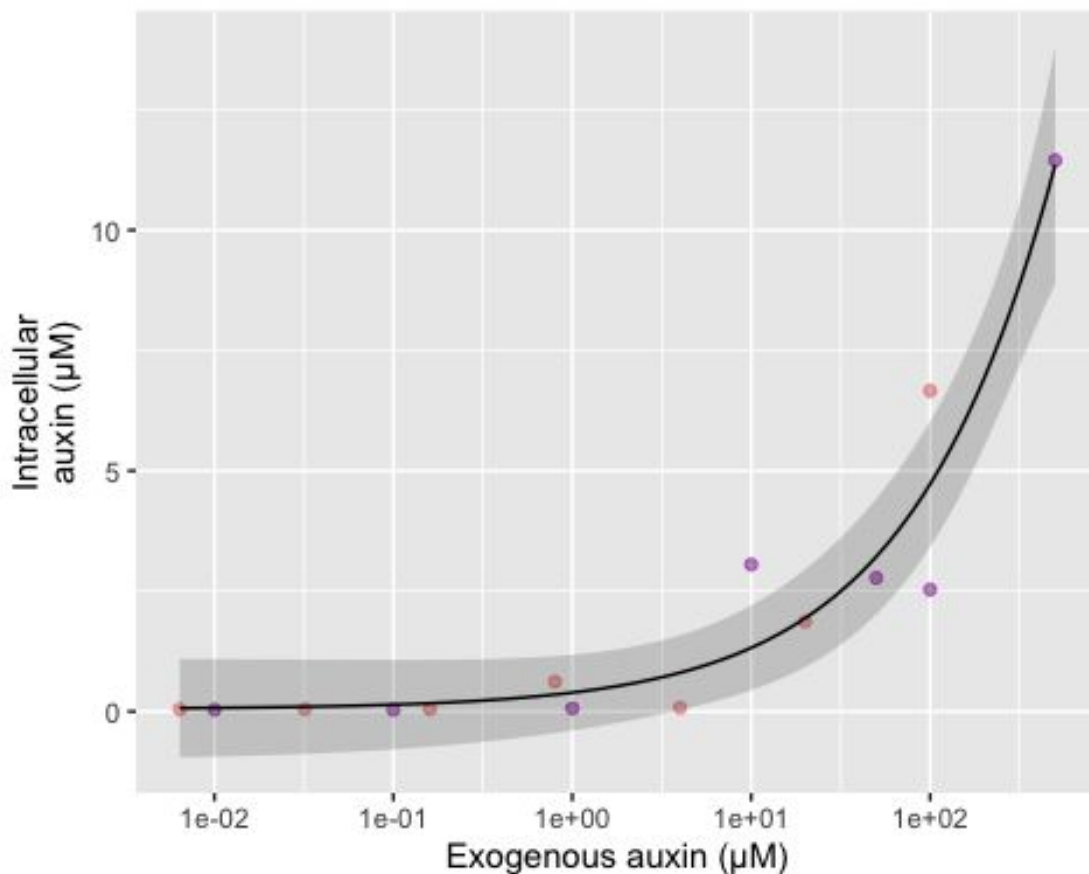

### Model sensor response to dose of exogenous auxin

```
ggplot(data = lcms_data, mapping = aes(x = Dose_IAA, y = Red_Green, color = experiment)) +  
  geom_point() + scale_x_log10() + scale_y_log10() +  
  scale_color_viridis_d(begin = 0.3,  
    end = 0.6, option = "plasma")
```

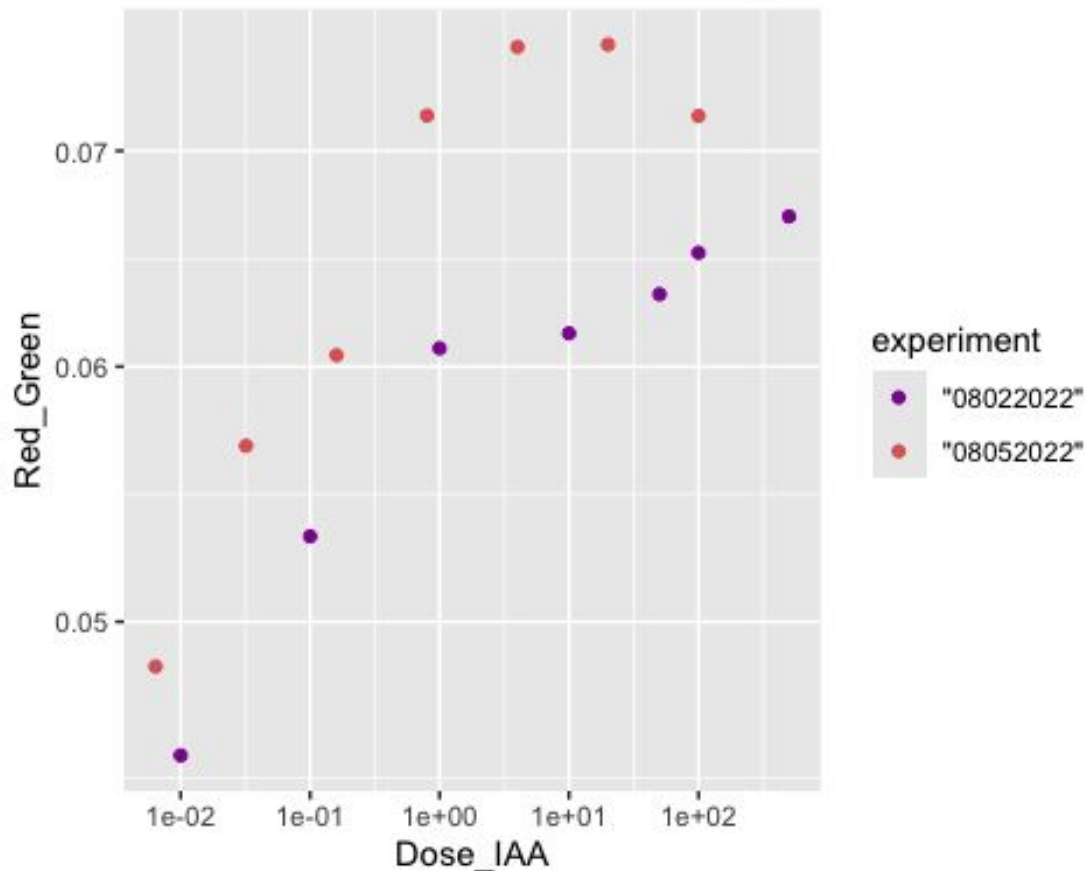

Again we would expect the biosensor to follow a log-logistic sigmoidal model. We will begin with 4-parameter.

```
sensor_dose4 <- drm(Red_Green ~ Dose_IAA, data = lcms_data, fct = LL.4())  
summary(sensor_dose4)  
##  
## Model fitted: Log-Logistic (ED50 as parameter) (4 parms)  
##  
## Parameter estimates:  
##  
##           Estimate Std. Error t-value  p-value  
## b:(Intercept) -1.0482881  0.9844180 -1.0649 0.3119662  
## c:(Intercept)  0.0468044  0.0083925  5.5769 0.0002351 ***  
## d:(Intercept)  0.0684222  0.0021741 31.4711 2.466e-11 ***  
## e:(Intercept)  0.1058917  0.1420457  0.7455 0.4731420  
## ---
```

```
## Signif. codes:  0 '***' 0.001 '**' 0.01 '*' 0.05 '.' 0.1 ' ' 1
##
## Residual standard error:
##
## 0.005691664 (10 degrees of freedom)
AIC(sensor_dose4)
## [1] -99.70541
```

Comparing different model forms

```
mselect(sensor_dose4, list(LL2.4(), LL.5(), LL2.5(), LL.3(), lnormal(),
L.4()), linreg = TRUE,
icfct = AIC)
## Error in optim(startVec, opfct, hessian = TRUE, method = optMethod,
control = list(maxit = maxIt, :
## non-finite finite-difference value [3]
##          LogLik          IC Lack of fit          Res var
## lnormal  54.90854 -99.81709  0.5664641 3.213764e-05
## LL.4     54.85270 -99.70541  0.5645635 3.239504e-05
## LL2.4    54.83463 -99.66925  0.5639490 3.247880e-05
## LL.5     55.04776 -98.09552  0.5428047 3.500533e-05
## LL2.5    54.78083 -97.56165  0.5339450 3.636598e-05
## Lin      46.32853 -86.65705           NA 9.123359e-05
## Quad     47.17317 -86.34634           NA 8.821448e-05
## Cubic    47.77963 -85.55926           NA 8.898289e-05
## L.4      46.93236 -83.86472  0.3382902 1.004322e-04
## LL.3     NA          NA          NA          NA
```

We see that log-normal model has the lowest AIC, but the limited dose range of this dataset also prevents the bottom of the curve from being well defined. The AIC and residual variance of log-normal and log-logistic models are very similar. Additionally the model form and shape of log-normal and log-logistic models are quite similar with the exception of tail behavior. As the tail of this model is poorly defined, we will use the log-normal model as suggested by AIC.

```
sensor_dose4 <- drm(Red_Green ~ Dose_IAA, data = lcms_data, fct = lnormal())
summary(sensor_dose4)
##
## Model fitted: Log-normal (4 parms)
##
## Parameter estimates:
##
##          Estimate Std. Error t-value p-value
## b:(Intercept) 0.5423538  0.4291607  1.2638  0.234983
## c:(Intercept) 0.0454775  0.0106813  4.2577  0.001669 **
## d:(Intercept) 0.0684111  0.0021358 32.0302 2.071e-11 ***
## e:(Intercept) 0.0856090  0.1409665  0.6073  0.557189
## ---
## Signif. codes:  0 '***' 0.001 '**' 0.01 '*' 0.05 '.' 0.1 ' ' 1
##
## Residual standard error:
```

```

# #
# # 0.005669007 (10 degrees of freedom)
AIC(sensor_dose4)
# # [1] -99.81709

# predictions and confidence intervals.
sensor_dose4.pred <- expand.grid(conc = exp(seq(log(max(lcms_data$Dose_IAA)),
log(min(lcms_data$Dose_IAA)),
length = 100)))
# new data with predictions
pm <- predict(sensor_dose4, newdata = sensor_dose4.pred, interval =
"confidence")
sensor_dose4.pred$p <- pm[, 1]
sensor_dose4.pred$pmin <- pm[, 2]
sensor_dose4.pred$pmax <- pm[, 3]

ggplot(data = lcms_data, mapping = aes(x = Dose_IAA, y = Red_Green, color =
experiment)) +
  geom_point(alpha = 0.5) + geom_ribbon(data = sensor_dose4.pred, aes(x =
conc,
y = p, ymin = pmin, ymax = pmax), alpha = 0.2, inherit.aes = FALSE) +
geom_line(data = sensor_dose4.pred,
aes(x = conc, y = p), inherit.aes = FALSE) + scale_x_log10() +
guides(color = "none") +
labs(x = "Exogenous auxin ( $\mu$ M)", y = "mScarlet/Venus") +
scale_color_viridis_d(begin = 0.3,
end = 0.6, option = "plasma") -> sensor_dose
sensor_dose

```



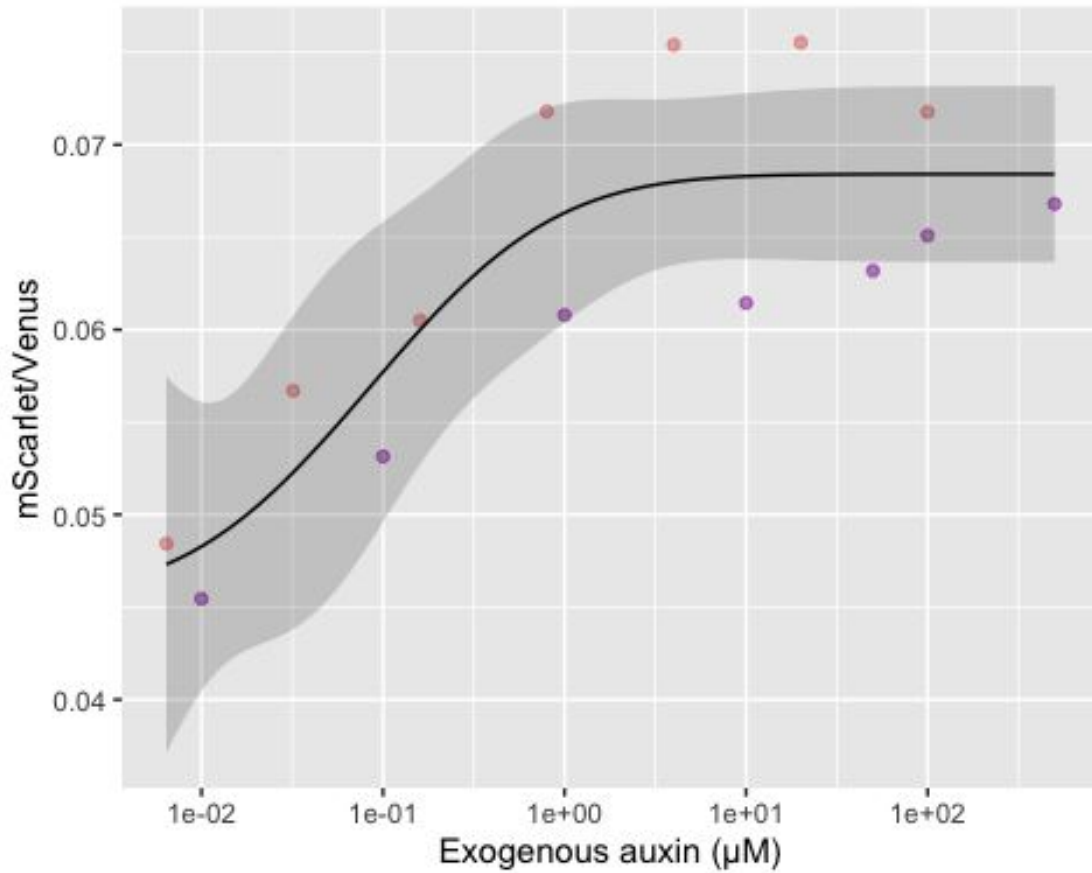

#####

Model biosensor response vs measured intracellular auxin

```
ggplot(data = lcms_data, mapping = aes(x = Observe_IAA_in_uM, y = Red_Green,
color = experiment)) +
  geom_point() + scale_x_log10() + scale_y_log10() +
  scale_color_viridis_d(begin = 0.3,
  end = 0.6, option = "plasma")
```



```
## [1] -100.556
plot(sensor_intra)
```

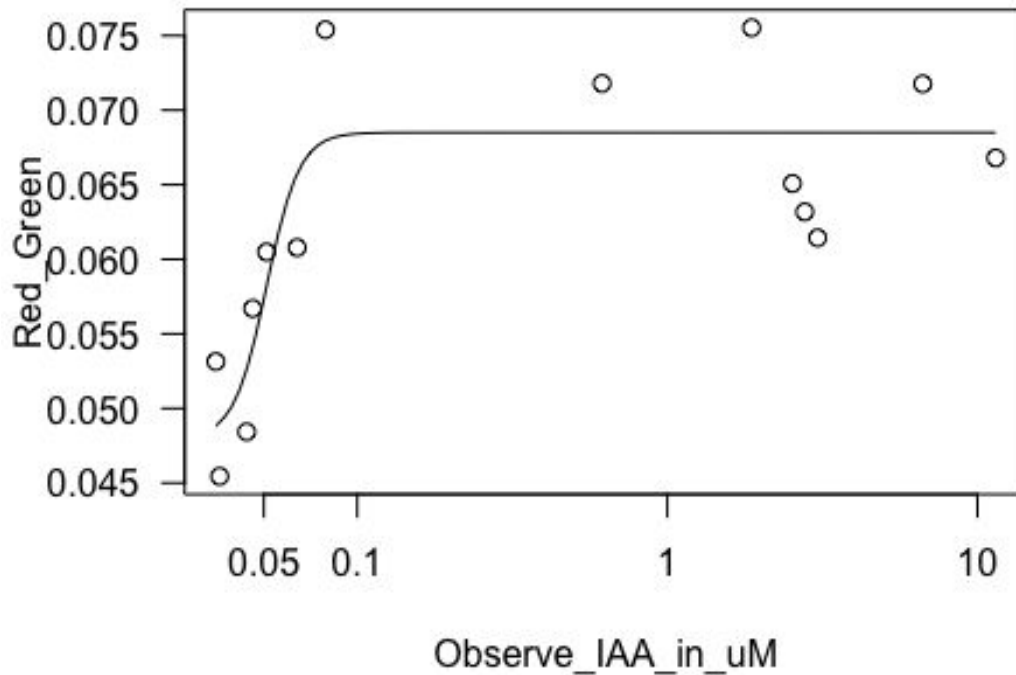

```
mselect(sensor_intra, list(LL2.4(), LL.5(), LL2.5(), LL.3(), lnormal(),
L.4()), linreg = TRUE,
icfct = AIC)
```

| ## |         | logLik   | IC         | Lack of fit | Res var      |
|----|---------|----------|------------|-------------|--------------|
| ## | LL.4    | 55.27799 | -100.55597 | NA          | 3.048548e-05 |
| ## | LL.3    | 54.09468 | -100.18935 | NA          | 3.281825e-05 |
| ## | LL.5    | 55.37599 | -98.75197  | NA          | 3.340184e-05 |
| ## | lnormal | 54.02716 | -98.05432  | NA          | 3.644995e-05 |
| ## | LL2.4   | 53.89330 | -97.78660  | NA          | 3.715368e-05 |
| ## | LL2.5   | 53.81308 | -95.62616  | NA          | 4.175768e-05 |
| ## | Lin     | 46.91282 | -87.82564  | NA          | 8.392748e-05 |
| ## | Quad    | 47.78085 | -87.56170  | NA          | 8.087944e-05 |
| ## | L.4     | 48.20921 | -86.41843  | NA          | 8.368628e-05 |
| ## | Cubic   | 47.88493 | -85.76985  | NA          | 8.765442e-05 |

In this case the 4-parameter log-logistic model had the lowest AIC and is still the best model for this dataset.

```
sensor_intra <- drm(Red_Green ~ Observe_IAA_in_uM, data = lcms_data, fct =
LL.4())
```

```

summary(sensor_intra)
# #
# # Model fitted: Log-Logistic (ED50 as parameter) (4 parms)
# #
# # Parameter estimates:
# #
# #           Estimate Std. Error t-value  p-value
# # b:(Intercept) -8.2406629  6.1221748 -1.3460   0.208
# # c:(Intercept)  0.0479589  0.0052282  9.1731 3.485e-06 ***
# # d:(Intercept)  0.0685034  0.0020055 34.1569 1.095e-11 ***
# # e:(Intercept)  0.0510555  0.0065434  7.8026 1.465e-05 ***
# # ---
# # Signif. codes:  0 '***' 0.001 '**' 0.01 '*' 0.05 '.' 0.1 ' ' 1
# #
# # Residual standard error:
# #
# # 0.005521366 (10 degrees of freedom)
AIC(sensor_intra)
# # [1] -100.556

# predictions and confidence intervals.
sensor_intra.pred <- expand.grid(conc =
exp(seq(log(max(lcms_data$Observe_IAA_in_uM)),
log(min(lcms_data$Observe_IAA_in_uM)), length = 100)))
# new data with predictions
pm <- predict(sensor_intra, newdata = sensor_intra.pred, interval =
"confidence")
sensor_intra.pred$p <- pm[, 1]
sensor_intra.pred$pmin <- pm[, 2]
sensor_intra.pred$pmax <- pm[, 3]

ggplot(data = lcms_data, mapping = aes(x = Observe_IAA_in_uM, y = Red_Green,
color = experiment)) +
  geom_point(alpha = 0.5) + geom_ribbon(data = sensor_intra.pred, aes(x =
conc,
y = p, ymin = pmin, ymax = pmax), alpha = 0.2, inherit.aes = FALSE) +
geom_line(data = sensor_intra.pred,
aes(x = conc, y = p), inherit.aes = FALSE) + scale_x_log10() +
guides(color = "none") +
labs(x = "Intracellular auxin ( $\mu\text{M}$ )", y = "mScarlet/Venus") +
scale_color_viridis_d(begin = 0.3,
end = 0.6, option = "plasma") -> sensor_intra
sensor_intra

```

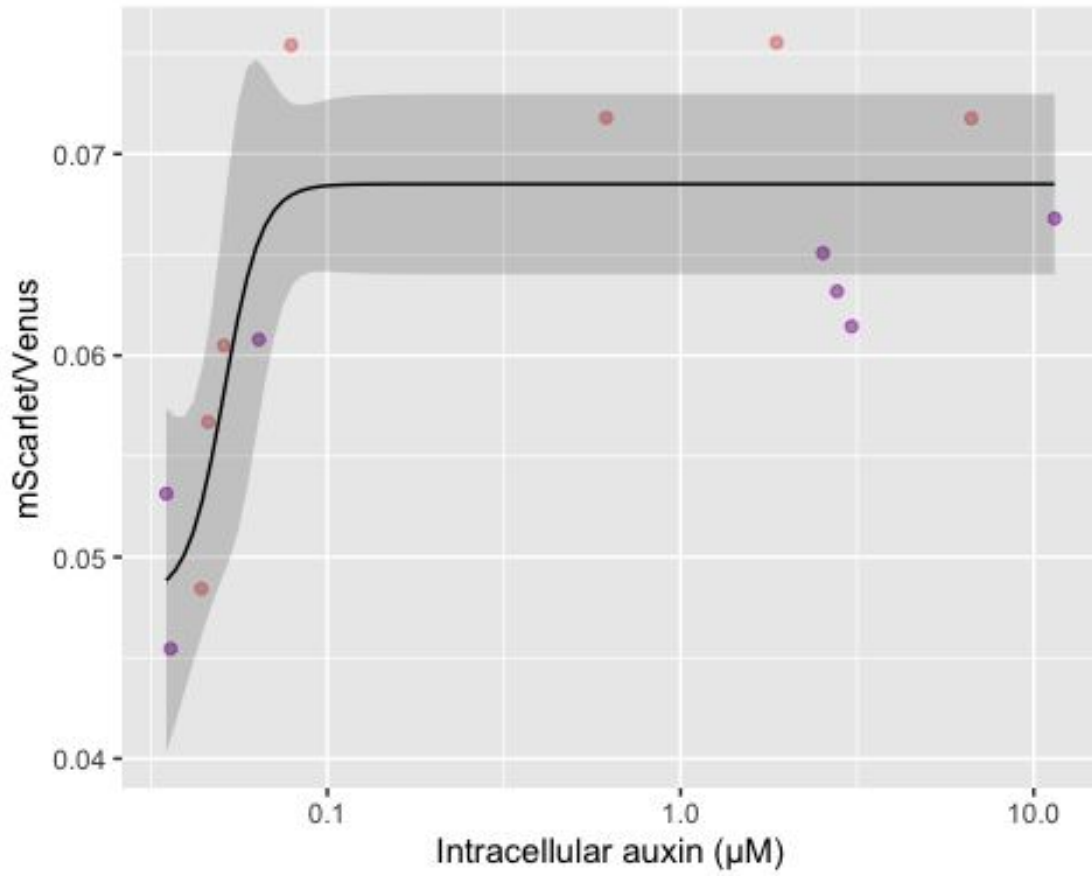

```
library(patchwork)
combined_plot <- intra_dose/sensor_dose/sensor_intra +
plot_annotation(tag_levels = ("A")) &
  theme(text = element_text(size = 8))
combined_plot
```

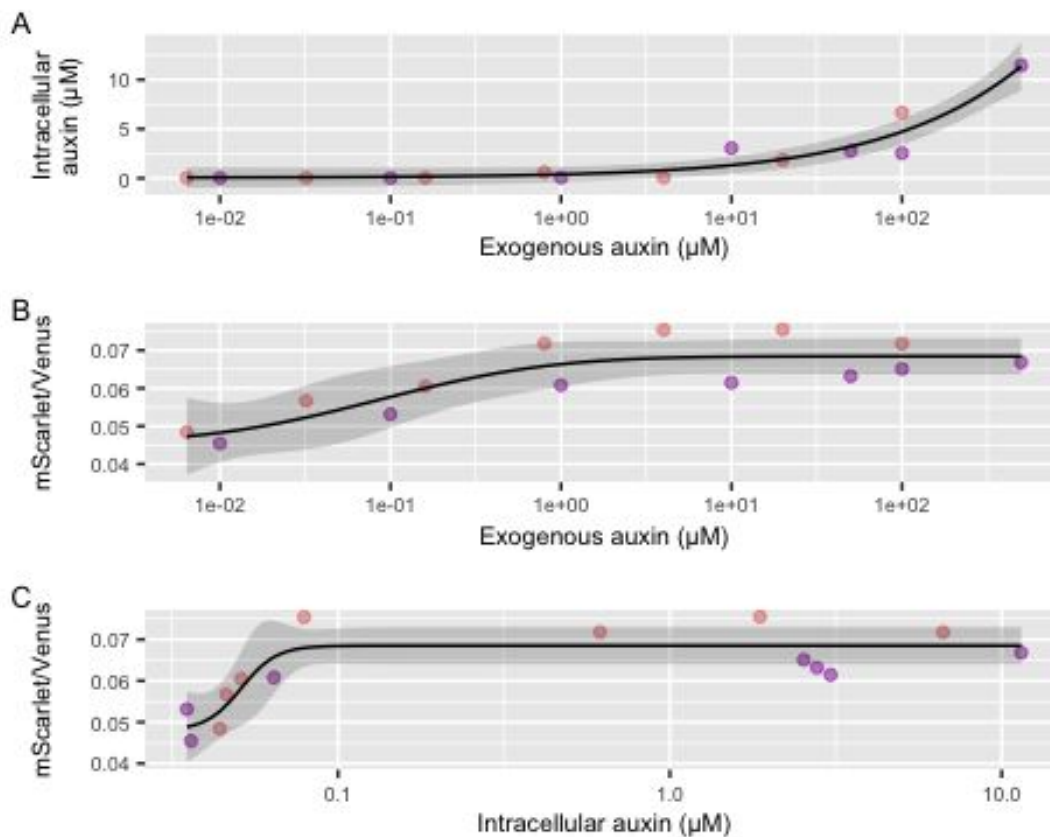

```
# ggsave('combined_plot.png', width = 3.5, height = 5)
```

Figure 8A: Dose-response curve for auxin at early stationary phase, 2 replicates

```
plate_DRA_stat_combined <- read.plateSet(path = "Data for publication/Dose-
response_Stationary_combined/All data combined/",
  pattern = "S-DRA*")
```

```
# original cultures, very concentrated, dilute the cultures 'before each
# measurement' with 100 ul SCM, and 10 ul cell culture
```

```
annotation_plate_DRA_stat_combined <- createAnnotation(yourFlowSet =
plate_DRA_stat_combined)
write.csv(annotation_plate_DRA_stat_combined, "/Users/patchaisupa/OneDrive -
Virginia Tech/Manuscripts/auxin biosensor/Data for publication/Dose-
response_Stationary_combined/plate_DRA_stat_annotation.csv")
```

```
annotation_plate_DRA_stat_combined <- read.csv("Data for publication/Dose-
response_Stationary_combined/plate_DRA_stat_annotation.csv")
```

```
aplate_DRA_stat_combined <- annotateFlowSet(yourFlowSet =
plate_DRA_stat_combined,
```

```

    annotation_df = annotation_plate_DRA_stat_combined, mergeBy = "name")
head(rownames(pData(aplate_DRA_stat_combined)))
# # [1] "1Pat-04212024-yWL210_Stationary_DRA06-B_Experiment_Colony 1_IAA 0
uM.fcs"
# # [2] "1Pat-04212024-yWL210_Stationary_DRA06-B_Experiment_Colony 1_IAA
0.000095 uM.fcs"
# # [3] "1Pat-04212024-yWL210_Stationary_DRA06-B_Experiment_Colony 1_IAA
0.00038 uM.fcs"
# # [4] "1Pat-04212024-yWL210_Stationary_DRA06-B_Experiment_Colony 1_IAA
0.0015 uM.fcs"
# # [5] "1Pat-04212024-yWL210_Stationary_DRA06-B_Experiment_Colony 1_IAA
0.0061 uM.fcs"
# # [6] "1Pat-04212024-yWL210_Stationary_DRA06-B_Experiment_Colony 1_IAA
0.0244 uM.fcs"
head(pData(aplate_DRA_stat_combined))
# #
name
# # 1Pat-04212024-yWL210_Stationary_DRA06-B_Experiment_Colony 1_IAA 0 uM.fcs
1Pat-04212024-yWL210_Stationary_DRA06-B_Experiment_Colony 1_IAA 0 uM.fcs
# # 1Pat-04212024-yWL210_Stationary_DRA06-B_Experiment_Colony 1_IAA 0.000095
uM.fcs 1Pat-04212024-yWL210_Stationary_DRA06-B_Experiment_Colony 1_IAA
0.000095 uM.fcs
# # 1Pat-04212024-yWL210_Stationary_DRA06-B_Experiment_Colony 1_IAA 0.00038
uM.fcs 1Pat-04212024-yWL210_Stationary_DRA06-B_Experiment_Colony 1_IAA
0.00038 uM.fcs
# # 1Pat-04212024-yWL210_Stationary_DRA06-B_Experiment_Colony 1_IAA 0.0015
uM.fcs 1Pat-04212024-yWL210_Stationary_DRA06-B_Experiment_Colony 1_IAA
0.0015 uM.fcs
# # 1Pat-04212024-yWL210_Stationary_DRA06-B_Experiment_Colony 1_IAA 0.0061
uM.fcs 1Pat-04212024-yWL210_Stationary_DRA06-B_Experiment_Colony 1_IAA
0.0061 uM.fcs
# # 1Pat-04212024-yWL210_Stationary_DRA06-B_Experiment_Colony 1_IAA 0.0244
uM.fcs 1Pat-04212024-yWL210_Stationary_DRA06-B_Experiment_Colony 1_IAA
0.0244 uM.fcs
# #
folder
# # 1Pat-04212024-yWL210_Stationary_DRA06-B_Experiment_Colony 1_IAA 0 uM.fcs
S-DRA06
# # 1Pat-04212024-yWL210_Stationary_DRA06-B_Experiment_Colony 1_IAA 0.000095
uM.fcs S-DRA06
# # 1Pat-04212024-yWL210_Stationary_DRA06-B_Experiment_Colony 1_IAA 0.00038
uM.fcs S-DRA06
# # 1Pat-04212024-yWL210_Stationary_DRA06-B_Experiment_Colony 1_IAA 0.0015
uM.fcs S-DRA06
# # 1Pat-04212024-yWL210_Stationary_DRA06-B_Experiment_Colony 1_IAA 0.0061
uM.fcs S-DRA06
# # 1Pat-04212024-yWL210_Stationary_DRA06-B_Experiment_Colony 1_IAA 0.0244
uM.fcs S-DRA06
# #
X

```

```
# # 1Pat-04212024-yWL210_Stationary_DRA06-B_Experiment_Colony 1_IAA 0 uM.fcs
1
# # 1Pat-04212024-yWL210_Stationary_DRA06-B_Experiment_Colony 1_IAA 0.000095
uM.fcs 2
# # 1Pat-04212024-yWL210_Stationary_DRA06-B_Experiment_Colony 1_IAA 0.00038
uM.fcs 3
# # 1Pat-04212024-yWL210_Stationary_DRA06-B_Experiment_Colony 1_IAA 0.0015
uM.fcs 4
# # 1Pat-04212024-yWL210_Stationary_DRA06-B_Experiment_Colony 1_IAA 0.0061
uM.fcs 5
# # 1Pat-04212024-yWL210_Stationary_DRA06-B_Experiment_Colony 1_IAA 0.0244
uM.fcs 6
# #
replicate
# # 1Pat-04212024-yWL210_Stationary_DRA06-B_Experiment_Colony 1_IAA 0 uM.fcs
1
# # 1Pat-04212024-yWL210_Stationary_DRA06-B_Experiment_Colony 1_IAA 0.000095
uM.fcs 1
# # 1Pat-04212024-yWL210_Stationary_DRA06-B_Experiment_Colony 1_IAA 0.00038
uM.fcs 1
# # 1Pat-04212024-yWL210_Stationary_DRA06-B_Experiment_Colony 1_IAA 0.0015
uM.fcs 1
# # 1Pat-04212024-yWL210_Stationary_DRA06-B_Experiment_Colony 1_IAA 0.0061
uM.fcs 1
# # 1Pat-04212024-yWL210_Stationary_DRA06-B_Experiment_Colony 1_IAA 0.0244
uM.fcs 1
# #
dose
# # 1Pat-04212024-yWL210_Stationary_DRA06-B_Experiment_Colony 1_IAA 0 uM.fcs
0.0000000
# # 1Pat-04212024-yWL210_Stationary_DRA06-B_Experiment_Colony 1_IAA 0.000095
uM.fcs 0.0000953
# # 1Pat-04212024-yWL210_Stationary_DRA06-B_Experiment_Colony 1_IAA 0.00038
uM.fcs 0.0003810
# # 1Pat-04212024-yWL210_Stationary_DRA06-B_Experiment_Colony 1_IAA 0.0015
uM.fcs 0.0015250
# # 1Pat-04212024-yWL210_Stationary_DRA06-B_Experiment_Colony 1_IAA 0.0061
uM.fcs 0.0061000
# # 1Pat-04212024-yWL210_Stationary_DRA06-B_Experiment_Colony 1_IAA 0.0244
uM.fcs 0.0244100
# #
treatment
# # 1Pat-04212024-yWL210_Stationary_DRA06-B_Experiment_Colony 1_IAA 0 uM.fcs
0 uM
# # 1Pat-04212024-yWL210_Stationary_DRA06-B_Experiment_Colony 1_IAA 0.000095
uM.fcs 0.0000953 uM
# # 1Pat-04212024-yWL210_Stationary_DRA06-B_Experiment_Colony 1_IAA 0.00038
uM.fcs 0.000381 uM
# # 1Pat-04212024-yWL210_Stationary_DRA06-B_Experiment_Colony 1_IAA 0.0015
uM.fcs 0.001525 uM
```



```

# # 1Pat-04212024-yWL210_Stationary_DRA06-B_Experiment_Colony 1_IAA 0.0061
uM.fcs      0.0061 uM
# # 1Pat-04212024-yWL210_Stationary_DRA06-B_Experiment_Colony 1_IAA 0.0244
uM.fcs      0.02441 uM

plate_DRA_stat_combined_sum <- summarizeFlow(plate_DRA_stat_combined,
channel = c("BL1.A",
            "YL1.A"), gated = TRUE)
# # [1] "Summarizing all events..."

#### Dose-response curve Comparing Log-Logistic and Weibull models (Figure 2
in
#### Ritz (2009))

fitdrc.m1 <- drm(YL1.Amean/BL1.Amean ~ dose, data =
plate_DRA_stat_combined_sum,
              fct = LL.4())

model.LL4_all_stat <- drm(YL1.Amean/BL1.Amean ~ dose, data =
plate_DRA_stat_combined_sum,
              fct = LL.4(names = c("Slope", "Lower Limit", "Upper Limit", "ED50")))
plot(model.LL4_all_stat, broken = TRUE, type = "none", lty = 1, lwd = 5, xlab
= "Extracellular IAA concentration (uM)",
      ylab = "Response Signal")
plot(model.LL4_all_stat, broken = TRUE, type = "confidence", col = "black",
add = TRUE)
summary(model.LL4_all_stat)
# #
# # Model fitted: Log-Logistic (ED50 as parameter) (4 parms)
# #
# # Parameter estimates:
# #
# #           Estimate Std. Error t-value p-value
# # Slope:(Intercept)   -0.4817911  0.1550413  -3.1075 0.00555 **
# # Lower Limit:(Intercept) 0.2380062  0.0081121  29.3398 < 2e-16 ***
# # Upper Limit:(Intercept) 0.2941612  0.0039880  73.7613 < 2e-16 ***
# # ED50:(Intercept)       0.0030387  0.0033813   0.8987 0.37951
# # ---
# # Signif. codes:  0 '***' 0.001 '**' 0.01 '*' 0.05 '.' 0.1 ' ' 1
# #
# # Residual standard error:
# #
# # 0.01050806 (20 degrees of freedom)

replicate1_stat <- drm(YL1.Amean/BL1.Amean ~ dose, data =
subset(plate_DRA_stat_combined_sum,
      replicate == "1"), fct = LL.4())

```

```

replicate2_stat <- drm(YL1.Amean/BL1.Amean ~ dose, data =
subset(plate_DRA_stat_combined_sum,
  replicate == "2"), fct = LL.4())

plot(replicate1_stat, broken = TRUE, add = TRUE, type = "all", col = "dark
green",
  lty = 2)
plot(replicate2_stat, broken = TRUE, add = TRUE, type = "all", col = "dark
blue",
  lty = 2)

```

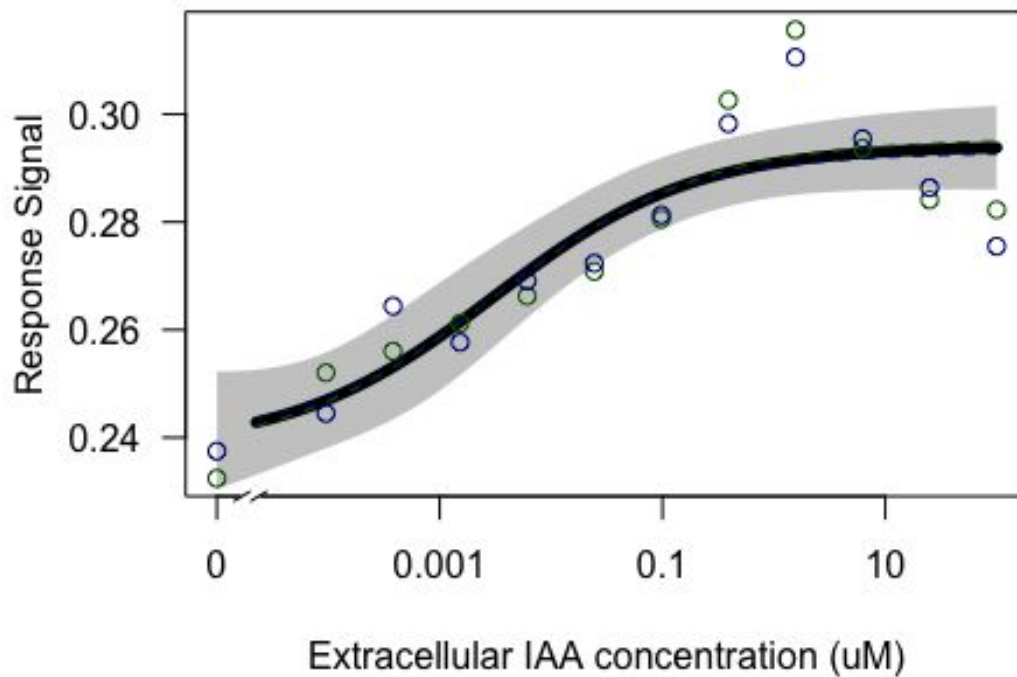

```

## Scale for x is already present.
## Adding another scale for x, which will replace the existing scale.
## Scale for y is already present.
## Adding another scale for y, which will replace the existing scale.

```

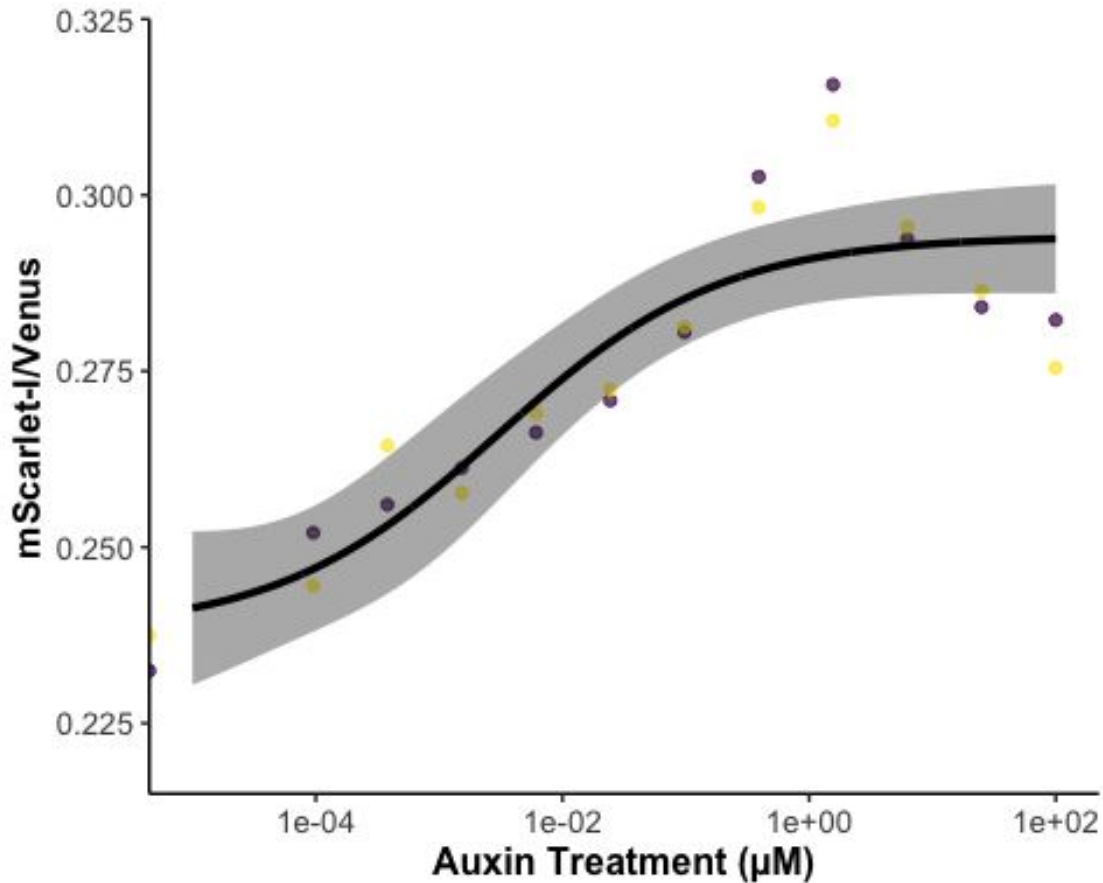

Figure 8B: Auxin accumulation in different yeast cultures measured by the AFB2 dual-fusion biosensor

```

plate_05052023_IAAacc <- read.plateSet(path = "Data for
publication/05052023_yWL209-210_IAAaccumulation/All data/",
  pattern = "Measurement*")

annotation <- createAnnotation(yourFlowSet = plate_05052023_IAAacc)
write.csv(annotation, "Data for publication/05052023_yWL209-
210_IAAaccumulation/05052023_IAAacc_annotation.csv")

annotation <- read.csv("Data for publication/05052023_yWL209-
210_IAAaccumulation/05052023_IAAacc_annotation.csv")
aplate_05052023_IAAacc <- annotateFlowSet(yourFlowSet =
plate_05052023_IAAacc, annotation_df = annotation,
  mergeBy = "name")
head(rownames(pData(aplate_05052023_IAAacc)))
## [1] "1Pat-05052023-IAAaccumulations_Expo1_IAAaccumulation_Aerobic_yWL209-
Control.fcs"
## [2] "1Pat-05052023-IAAaccumulations_Expo1_IAAaccumulation_Aerobic_yWL209-
IAAspike.fcs"
## [3] "1Pat-05052023-IAAaccumulations_Expo1_IAAaccumulation_Aerobic_yWL210-
Control.fcs"
## [4] "1Pat-05052023-IAAaccumulations_Expo1_IAAaccumulation_Aerobic_yWL210-

```

```

IAAspike.fcs"
# # [5] "1Pat-05052023-
IAAaccumulations_Expo1_IAAaccumulation_Anaerobic_yWL209-Control.fcs"
# # [6] "1Pat-05052023-
IAAaccumulations_Expo1_IAAaccumulation_Anaerobic_yWL209-IAAspike.fcs"
head(pData(plate_05052023_IAAacc))
# #
name
# # 1Pat-05052023-IAAaccumulations_Expo1_IAAaccumulation_Aerobic_yWL209-
Control.fcs      1Pat-05052023-
IAAaccumulations_Expo1_IAAaccumulation_Aerobic_yWL209-Control.fcs
# # 1Pat-05052023-IAAaccumulations_Expo1_IAAaccumulation_Aerobic_yWL209-
IAAspike.fcs      1Pat-05052023-
IAAaccumulations_Expo1_IAAaccumulation_Aerobic_yWL209-IAAspike.fcs
# # 1Pat-05052023-IAAaccumulations_Expo1_IAAaccumulation_Aerobic_yWL210-
Control.fcs      1Pat-05052023-
IAAaccumulations_Expo1_IAAaccumulation_Aerobic_yWL210-Control.fcs
# # 1Pat-05052023-IAAaccumulations_Expo1_IAAaccumulation_Aerobic_yWL210-
IAAspike.fcs      1Pat-05052023-
IAAaccumulations_Expo1_IAAaccumulation_Aerobic_yWL210-IAAspike.fcs
# # 1Pat-05052023-IAAaccumulations_Expo1_IAAaccumulation_Anaerobic_yWL209-
Control.fcs      1Pat-05052023-
IAAaccumulations_Expo1_IAAaccumulation_Anaerobic_yWL209-Control.fcs
# # 1Pat-05052023-IAAaccumulations_Expo1_IAAaccumulation_Anaerobic_yWL209-
IAAspike.fcs      1Pat-05052023-
IAAaccumulations_Expo1_IAAaccumulation_Anaerobic_yWL209-IAAspike.fcs
# #
folder
# # 1Pat-05052023-IAAaccumulations_Expo1_IAAaccumulation_Aerobic_yWL209-
Control.fcs      Measurement01
# # 1Pat-05052023-IAAaccumulations_Expo1_IAAaccumulation_Aerobic_yWL209-
IAAspike.fcs      Measurement01
# # 1Pat-05052023-IAAaccumulations_Expo1_IAAaccumulation_Aerobic_yWL210-
Control.fcs      Measurement01
# # 1Pat-05052023-IAAaccumulations_Expo1_IAAaccumulation_Aerobic_yWL210-
IAAspike.fcs      Measurement01
# # 1Pat-05052023-IAAaccumulations_Expo1_IAAaccumulation_Anaerobic_yWL209-
Control.fcs      Measurement01
# # 1Pat-05052023-IAAaccumulations_Expo1_IAAaccumulation_Anaerobic_yWL209-
IAAspike.fcs      Measurement01
# #
X
# # 1Pat-05052023-IAAaccumulations_Expo1_IAAaccumulation_Aerobic_yWL209-
Control.fcs      1
# # 1Pat-05052023-IAAaccumulations_Expo1_IAAaccumulation_Aerobic_yWL209-
IAAspike.fcs      2
# # 1Pat-05052023-IAAaccumulations_Expo1_IAAaccumulation_Aerobic_yWL210-
Control.fcs      3
# # 1Pat-05052023-IAAaccumulations_Expo1_IAAaccumulation_Aerobic_yWL210-
IAAspike.fcs      4

```

```

## 1Pat-05052023-IAAaccumulations_Expo1_IAAaccumulation_Anaerobic_yWL209-
Control.fcs 5
## 1Pat-05052023-IAAaccumulations_Expo1_IAAaccumulation_Anaerobic_yWL209-
IAAspike.fcs 6
##
condition
## 1Pat-05052023-IAAaccumulations_Expo1_IAAaccumulation_Aerobic_yWL209-
Control.fcs Aerobic
## 1Pat-05052023-IAAaccumulations_Expo1_IAAaccumulation_Aerobic_yWL209-
IAAspike.fcs Aerobic
## 1Pat-05052023-IAAaccumulations_Expo1_IAAaccumulation_Aerobic_yWL210-
Control.fcs Aerobic
## 1Pat-05052023-IAAaccumulations_Expo1_IAAaccumulation_Aerobic_yWL210-
IAAspike.fcs Aerobic
## 1Pat-05052023-IAAaccumulations_Expo1_IAAaccumulation_Anaerobic_yWL209-
Control.fcs Anaerobic
## 1Pat-05052023-IAAaccumulations_Expo1_IAAaccumulation_Anaerobic_yWL209-
IAAspike.fcs Anaerobic
##
treatment
## 1Pat-05052023-IAAaccumulations_Expo1_IAAaccumulation_Aerobic_yWL209-
Control.fcs Control
## 1Pat-05052023-IAAaccumulations_Expo1_IAAaccumulation_Aerobic_yWL209-
IAAspike.fcs 1 uM IAA
## 1Pat-05052023-IAAaccumulations_Expo1_IAAaccumulation_Aerobic_yWL210-
Control.fcs Control
## 1Pat-05052023-IAAaccumulations_Expo1_IAAaccumulation_Aerobic_yWL210-
IAAspike.fcs 1 uM IAA
## 1Pat-05052023-IAAaccumulations_Expo1_IAAaccumulation_Anaerobic_yWL209-
Control.fcs Control
## 1Pat-05052023-IAAaccumulations_Expo1_IAAaccumulation_Anaerobic_yWL209-
IAAspike.fcs 1 uM IAA
##
reading
## 1Pat-05052023-IAAaccumulations_Expo1_IAAaccumulation_Aerobic_yWL209-
Control.fcs 1
## 1Pat-05052023-IAAaccumulations_Expo1_IAAaccumulation_Aerobic_yWL209-
IAAspike.fcs 1
## 1Pat-05052023-IAAaccumulations_Expo1_IAAaccumulation_Aerobic_yWL210-
Control.fcs 1
## 1Pat-05052023-IAAaccumulations_Expo1_IAAaccumulation_Aerobic_yWL210-
IAAspike.fcs 1
## 1Pat-05052023-IAAaccumulations_Expo1_IAAaccumulation_Anaerobic_yWL209-
Control.fcs 1
## 1Pat-05052023-IAAaccumulations_Expo1_IAAaccumulation_Anaerobic_yWL209-
IAAspike.fcs 1
##
strain
## 1Pat-05052023-IAAaccumulations_Expo1_IAAaccumulation_Aerobic_yWL209-
Control.fcs yWL209

```

```

# # 1Pat-05052023-IAAaccumulations_Expo1_IAAaccumulation_Aerobic_yWL209-
IAAspike.fcs yWL209
# # 1Pat-05052023-IAAaccumulations_Expo1_IAAaccumulation_Aerobic_yWL210-
Control.fcs yWL210
# # 1Pat-05052023-IAAaccumulations_Expo1_IAAaccumulation_Aerobic_yWL210-
IAAspike.fcs yWL210
# # 1Pat-05052023-IAAaccumulations_Expo1_IAAaccumulation_Anaerobic_yWL209-
Control.fcs yWL209
# # 1Pat-05052023-IAAaccumulations_Expo1_IAAaccumulation_Anaerobic_yWL209-
IAAspike.fcs yWL209
# #
phase
# # 1Pat-05052023-IAAaccumulations_Expo1_IAAaccumulation_Aerobic_yWL209-
Control.fcs exponential
# # 1Pat-05052023-IAAaccumulations_Expo1_IAAaccumulation_Aerobic_yWL209-
IAAspike.fcs exponential
# # 1Pat-05052023-IAAaccumulations_Expo1_IAAaccumulation_Aerobic_yWL210-
Control.fcs exponential
# # 1Pat-05052023-IAAaccumulations_Expo1_IAAaccumulation_Aerobic_yWL210-
IAAspike.fcs exponential
# # 1Pat-05052023-IAAaccumulations_Expo1_IAAaccumulation_Anaerobic_yWL209-
Control.fcs exponential
# # 1Pat-05052023-IAAaccumulations_Expo1_IAAaccumulation_Anaerobic_yWL209-
IAAspike.fcs exponential
# #
before_after
# # 1Pat-05052023-IAAaccumulations_Expo1_IAAaccumulation_Aerobic_yWL209-
Control.fcs before
# # 1Pat-05052023-IAAaccumulations_Expo1_IAAaccumulation_Aerobic_yWL209-
IAAspike.fcs before
# # 1Pat-05052023-IAAaccumulations_Expo1_IAAaccumulation_Aerobic_yWL210-
Control.fcs before
# # 1Pat-05052023-IAAaccumulations_Expo1_IAAaccumulation_Aerobic_yWL210-
IAAspike.fcs before
# # 1Pat-05052023-IAAaccumulations_Expo1_IAAaccumulation_Anaerobic_yWL209-
Control.fcs before
# # 1Pat-05052023-IAAaccumulations_Expo1_IAAaccumulation_Anaerobic_yWL209-
IAAspike.fcs before
# #
condition_phase
# # 1Pat-05052023-IAAaccumulations_Expo1_IAAaccumulation_Aerobic_yWL209-
Control.fcs Aerobic exponential
# # 1Pat-05052023-IAAaccumulations_Expo1_IAAaccumulation_Aerobic_yWL209-
IAAspike.fcs Aerobic exponential
# # 1Pat-05052023-IAAaccumulations_Expo1_IAAaccumulation_Aerobic_yWL210-
Control.fcs Aerobic exponential
# # 1Pat-05052023-IAAaccumulations_Expo1_IAAaccumulation_Aerobic_yWL210-
IAAspike.fcs Aerobic exponential
# # 1Pat-05052023-IAAaccumulations_Expo1_IAAaccumulation_Anaerobic_yWL209-
Control.fcs Anaerobic exponential

```

```

## 1Pat-05052023-IAAaccumulations_Expo1_IAAaccumulation_Anaerobic_yWL209-
IAAspike.fcs Anaerobic exponential
##
X.1
## 1Pat-05052023-IAAaccumulations_Expo1_IAAaccumulation_Aerobic_yWL209-
Control.fcs NA
## 1Pat-05052023-IAAaccumulations_Expo1_IAAaccumulation_Aerobic_yWL209-
IAAspike.fcs NA
## 1Pat-05052023-IAAaccumulations_Expo1_IAAaccumulation_Aerobic_yWL210-
Control.fcs NA
## 1Pat-05052023-IAAaccumulations_Expo1_IAAaccumulation_Aerobic_yWL210-
IAAspike.fcs NA
## 1Pat-05052023-IAAaccumulations_Expo1_IAAaccumulation_Anaerobic_yWL209-
Control.fcs NA
## 1Pat-05052023-IAAaccumulations_Expo1_IAAaccumulation_Anaerobic_yWL209-
IAAspike.fcs NA
##
design_yeast
## 1Pat-05052023-IAAaccumulations_Expo1_IAAaccumulation_Aerobic_yWL209-
Control.fcs TIR1 dual-fusion (YPH499)
## 1Pat-05052023-IAAaccumulations_Expo1_IAAaccumulation_Aerobic_yWL209-
IAAspike.fcs TIR1 dual-fusion (YPH499)
## 1Pat-05052023-IAAaccumulations_Expo1_IAAaccumulation_Aerobic_yWL210-
Control.fcs AFB2 dual-fusion (YPH499)
## 1Pat-05052023-IAAaccumulations_Expo1_IAAaccumulation_Aerobic_yWL210-
IAAspike.fcs AFB2 dual-fusion (YPH499)
## 1Pat-05052023-IAAaccumulations_Expo1_IAAaccumulation_Anaerobic_yWL209-
Control.fcs TIR1 dual-fusion (YPH499)
## 1Pat-05052023-IAAaccumulations_Expo1_IAAaccumulation_Anaerobic_yWL209-
IAAspike.fcs TIR1 dual-fusion (YPH499)
##
X.2
## 1Pat-05052023-IAAaccumulations_Expo1_IAAaccumulation_Aerobic_yWL209-
Control.fcs NA
## 1Pat-05052023-IAAaccumulations_Expo1_IAAaccumulation_Aerobic_yWL209-
IAAspike.fcs NA
## 1Pat-05052023-IAAaccumulations_Expo1_IAAaccumulation_Aerobic_yWL210-
Control.fcs NA
## 1Pat-05052023-IAAaccumulations_Expo1_IAAaccumulation_Aerobic_yWL210-
IAAspike.fcs NA
## 1Pat-05052023-IAAaccumulations_Expo1_IAAaccumulation_Anaerobic_yWL209-
Control.fcs NA
## 1Pat-05052023-IAAaccumulations_Expo1_IAAaccumulation_Anaerobic_yWL209-
IAAspike.fcs NA
##
plot
## 1Pat-05052023-IAAaccumulations_Expo1_IAAaccumulation_Aerobic_yWL209-
Control.fcs no
## 1Pat-05052023-IAAaccumulations_Expo1_IAAaccumulation_Aerobic_yWL209-
IAAspike.fcs no

```

```

# # 1Pat-05052023-IAAaccumulations_Expo1_IAAaccumulation_Aerobic_yWL210-
Control.fcs      no
# # 1Pat-05052023-IAAaccumulations_Expo1_IAAaccumulation_Aerobic_yWL210-
IAAspike.fcs     no
# # 1Pat-05052023-IAAaccumulations_Expo1_IAAaccumulation_Anaerobic_yWL209-
Control.fcs      no
# # 1Pat-05052023-IAAaccumulations_Expo1_IAAaccumulation_Anaerobic_yWL209-
IAAspike.fcs     no

plate_05052023_IAAacc_sum <- summarizeFlow(aplate_05052023_IAAacc, channel =
c("BL1.A",
  "YL1.A"), gated = TRUE)
# # [1] "Summarizing all events..."

timecourse_210stat <- ggplot(subset(plate_05052023_IAAacc_sum, plot == "yes"
& condition_phase %in%
  c("Anaerobic late stationary", "Aerobic late stationary") & strain %in%
c("yWL210")),
  aes(x = time, y = YL1.Amean/BL1.Amean, color = treatment)) +
geom_point(size = 3) +
  geom_line(size = 2, alpha = 0.7) + facet_wrap(~condition_phase, scale =
"free_y") +
  scale_fill_manual(values = c("#a65c85ff", "#f9a242ff")) +
scale_colour_manual(name = "Auxin accumulation",
  limits = c("1 uM IAA", "Control"), labels = c("1 µM Auxin Spike", "Auxin
Production by Yeast"),
  values = c("#a65c85ff", "#f9a242ff")) + ylab("Detected
Auxin\n(mScarlet/Venus ratio)") +
  xlab("Time post treatment (mins)") + theme_classic() +
theme(legend.position = "bottom",
  axis.title.y = element_text(face = "bold", size = 12), axis.title.x =
element_text(face = "bold",
  size = 12), axis.text.y = element_text(size = 10), axis.text.x =
element_text(size = 10),
  legend.title = element_blank(), legend.text = element_text(size = 9))
timecourse_210stat

```



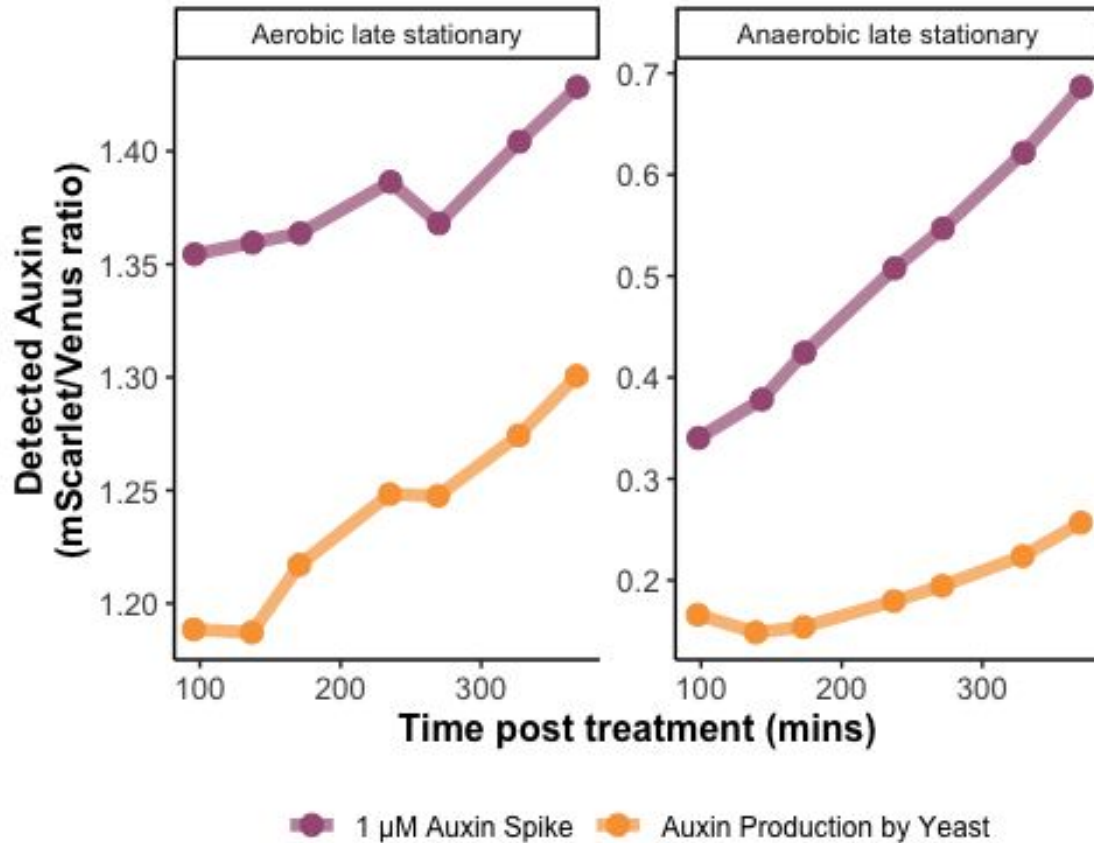

Figure 8C: The dual-fusion AFB2 biosensor predicts that auxin accumulates in stationary phase cultures

```

plate_05052023_IAAacc_sum2 <- steadyState(plate_05052023_IAAacc, gated =
TRUE)
## [1] "No further gating applied."
## [1] "Converting events..."

plate_05052023_IAAacc_sum2 <- subset(plate_05052023_IAAacc_sum2, plot ==
"yes" &
  treatment %in% c("Control") & reading %in% c(6, 9, 16))

plate_05052023_IAAacc_sum2$BL1.A |>
  range()
## [1] -18675 1048575
plate_05052023_IAAacc_sum2 <- subset(plate_05052023_IAAacc_sum2, BL1.A > 0 &
BL1.A <
  1e+06 & YL1.A > 0 & YL1.A < 1e+06)

plate_05052023_IAAacc_sum2$condition_phase <-
factor(plate_05052023_IAAacc_sum2$condition_phase,
  levels = c("Aerobic exponential", "Anaerobic exponential", "Aerobic early
stationary",

```

```

    "Anaerobic early stationary", "Aerobic late stationary", "Anaerobic
late stationary"))

plate_05052023_IAAacc_sum2 |>
  group_by(condition_phase, reading, strain) |>
  summarise(count = n())
## `summarise()` has grouped output by 'condition_phase', 'reading'. You can
## override using the `.groups` argument.
## # A tibble: 12 × 4
## # Groups:   condition_phase, reading [6]
##   condition_phase      reading strain count
##   <fct>                <int> <chr> <int>
## 1 Aerobic exponential      6 yWL209 44342
## 2 Aerobic exponential      6 yWL210 45595
## 3 Anaerobic exponential    6 yWL209 21808
## 4 Anaerobic exponential    6 yWL210 17312
## 5 Aerobic early stationary  9 yWL209 74032
## 6 Aerobic early stationary  9 yWL210 68406
## 7 Anaerobic early stationary 9 yWL209 32119
## 8 Anaerobic early stationary 9 yWL210 22179
## 9 Aerobic late stationary   16 yWL209 40012
## 10 Aerobic late stationary   16 yWL210 50930
## 11 Anaerobic late stationary  16 yWL209 37588
## 12 Anaerobic late stationary  16 yWL210 30680

ridge210_expostat <- ggplot(subset(plate_05052023_IAAacc_sum2, strain ==
"yWL210"),
  aes(x = YL1.A/BL1.A, y = condition_phase)) + geom_density_ridges(aes(fill
= condition_phase),
  scale = 2, alpha = 0.8, quantile_lines = TRUE, quantiles = 4, color =
"#042333b2") +
  scale_fill_viridis_d(name = "Quartiles", option = "plasma", begin = 0.1,
end = 0.7,
  alpha = 0.3) + scale_color_viridis_d(name = "Quartiles", option =
"plasma",
  begin = 0.1, end = 0.7, alpha = 0.3) + ylab("Phase and growth
conditions") +
  xlab("mScarlet/Venus ratio\n(Accumulated Auxin Production)") +
theme_classic() +
  theme(axis.title.y = element_text(size = 12, face = "bold"), axis.title.x
= element_text(size = 12,
  face = "bold"), axis.text = element_text(size = 10), legend.title =
element_text(size = 12,
  face = "bold"), legend.text = element_text(size = 10),
legend.position = "none") +
  scale_x_log10()
ridge210_expostat
## # Picking joint bandwidth of 0.0139

```

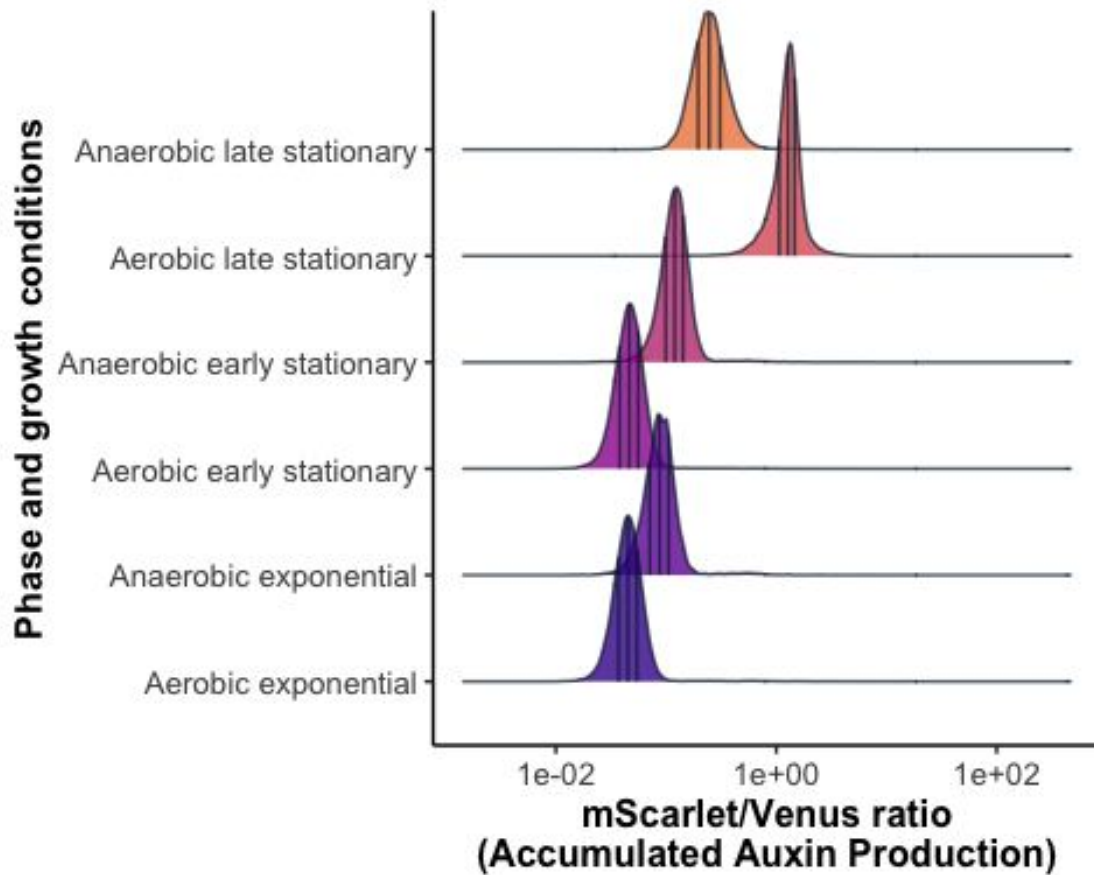

```

ridge210_expostat_fixaxis <- ridge210_expostat + theme(axis.text.y =
element_blank()) +
  annotate(geom = "text", x = 35, y = 6.2, label = "Anaerobic late
stationary",
    size = 4) + annotate(geom = "text", x = 35, y = 5.2, label = "Aerobic
late stationary",
    size = 4) + annotate(geom = "text", x = 35, y = 4.2, label = "Anaerobic
early stationary",
    size = 4) + annotate(geom = "text", x = 35, y = 3.2, label = "Aerobic
early stationary",
    size = 4) + annotate(geom = "text", x = 35, y = 2.2, label = "Anaerobic
exponential",
    size = 4) + annotate(geom = "text", x = 35, y = 1.2, label = "Aerobic
exponential",
    size = 4)
ridge210_expostat_fixaxis
## Picking joint bandwidth of 0.0139

```

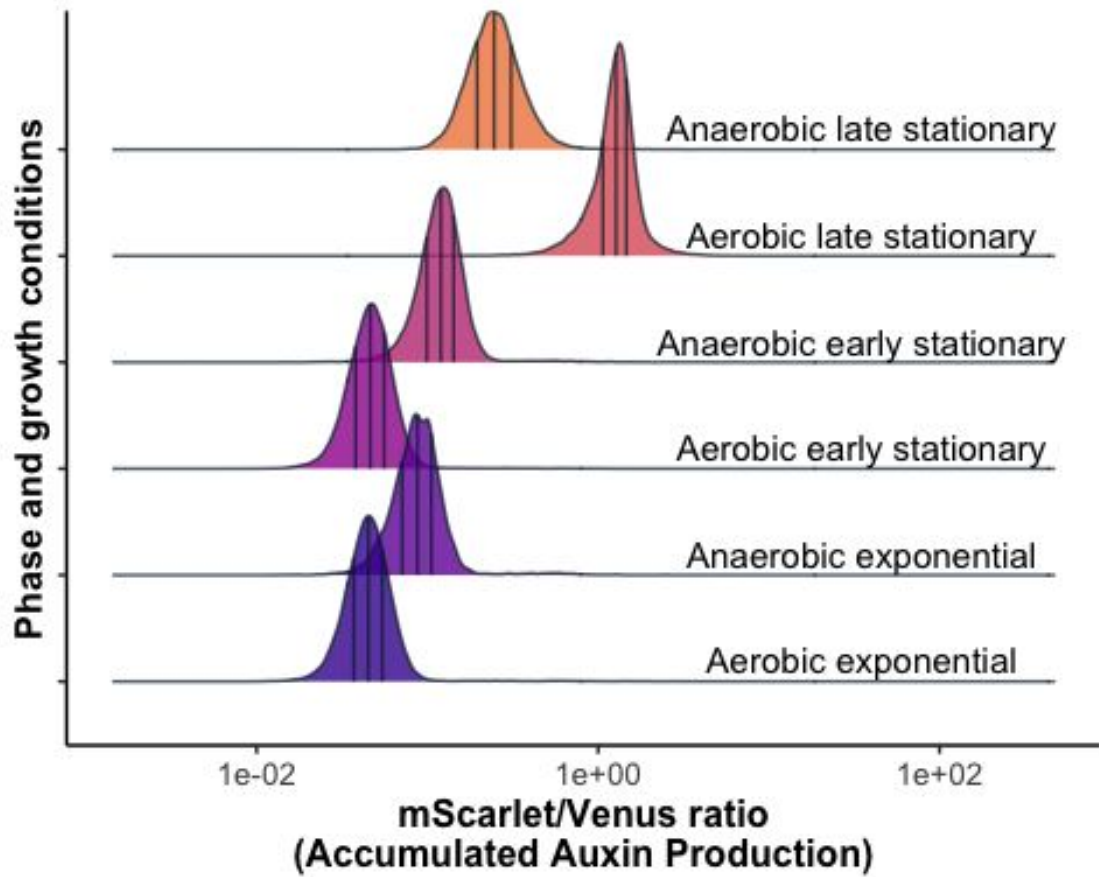

```
fig8AB <- ggarrange(plot210_stat_rep, timecourse_210stat, nrow = 2, ncol = 1,
  labels = c("A",
    "B"), heights = c(1, 1))
fig8AB
```

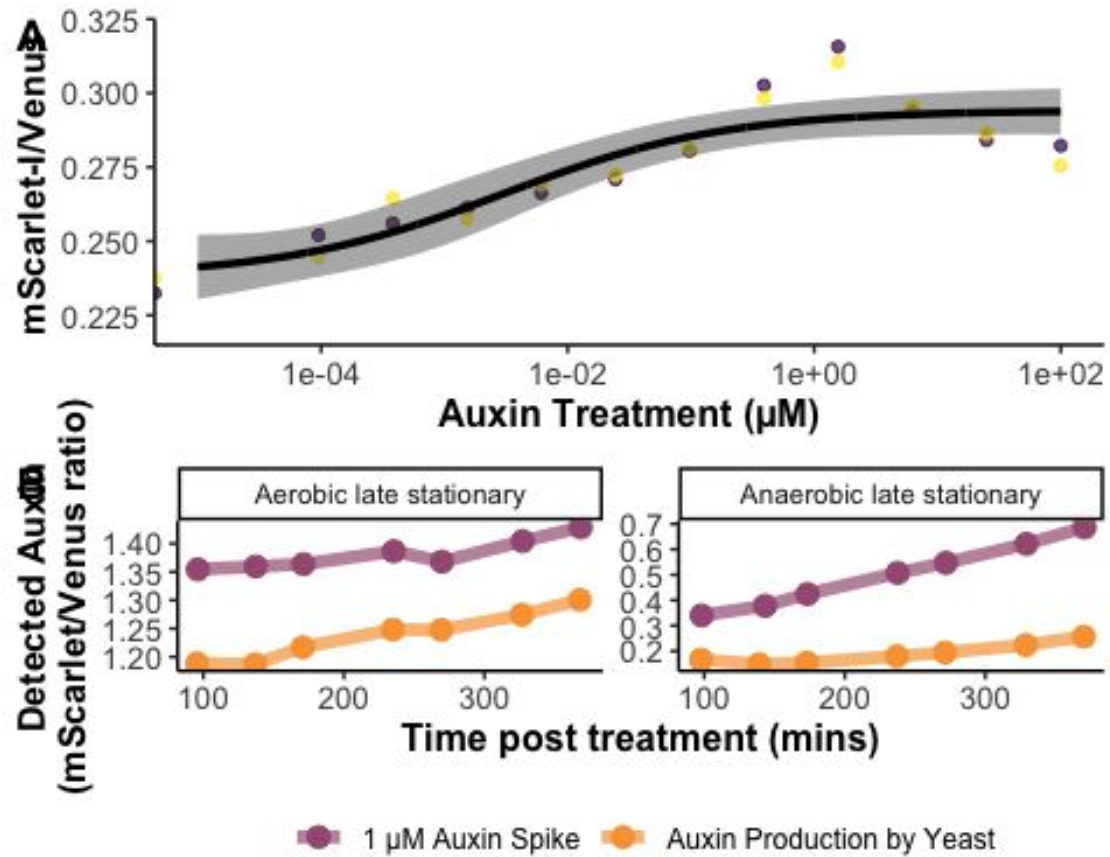

```
fig8C <- ggarrange(ridge210_expostat_fixaxis, nrow = 1, ncol = 1, labels =
c("C"))
## Picking joint bandwidth of 0.0139
fig8C
```

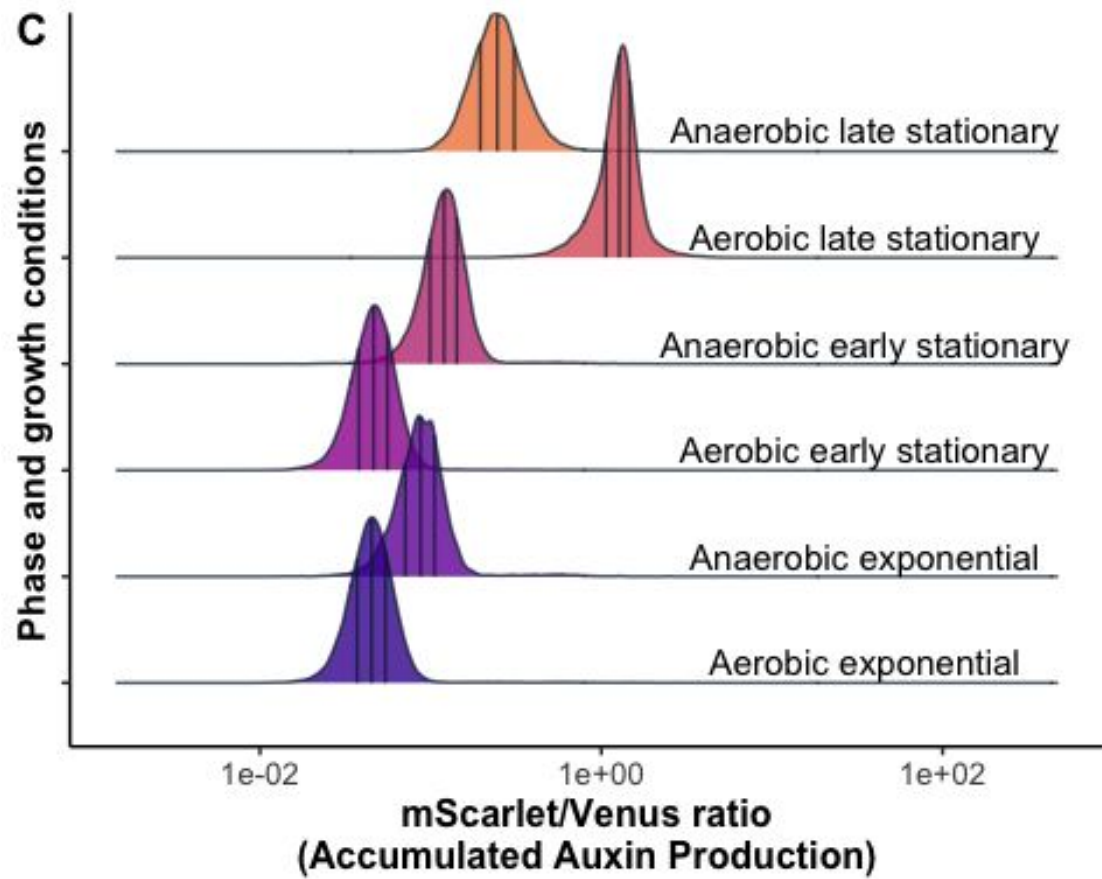

```
fig8ABC <- ggarrange(fig8AB, fig8C, nrow = 1, ncol = 2, widths = c(0.8, 1))
fig8ABC
```

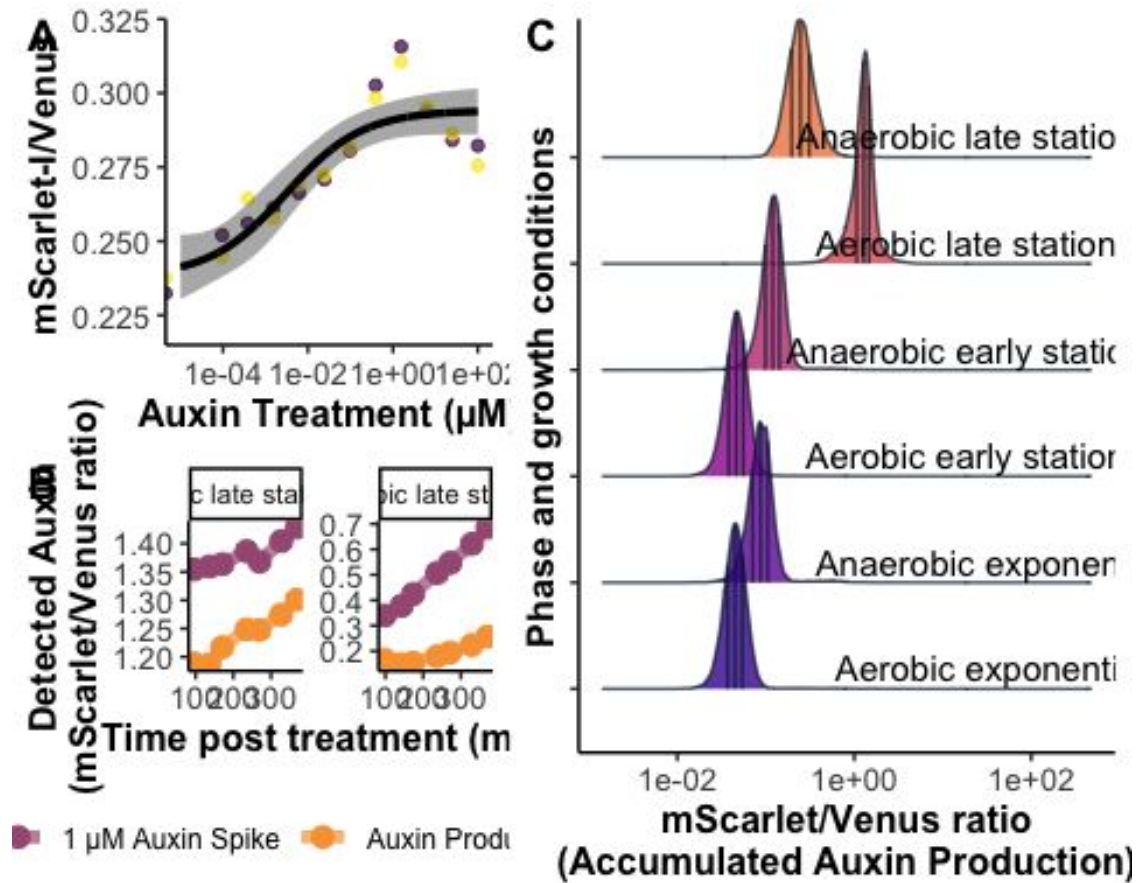

```
# ggsave('Figure8.png', width = 10, height = 6)
```

```
fig8new <- ggarrange(plot210_stat_rep, timecourse_210stat,
  ridge210_expostat_fixaxis,
  nrow = 1, ncol = 3, labels = c("A", "B", "C"), widths = c(0.8, 1, 1))
## Picking joint bandwidth of 0.0139
fig8new
```

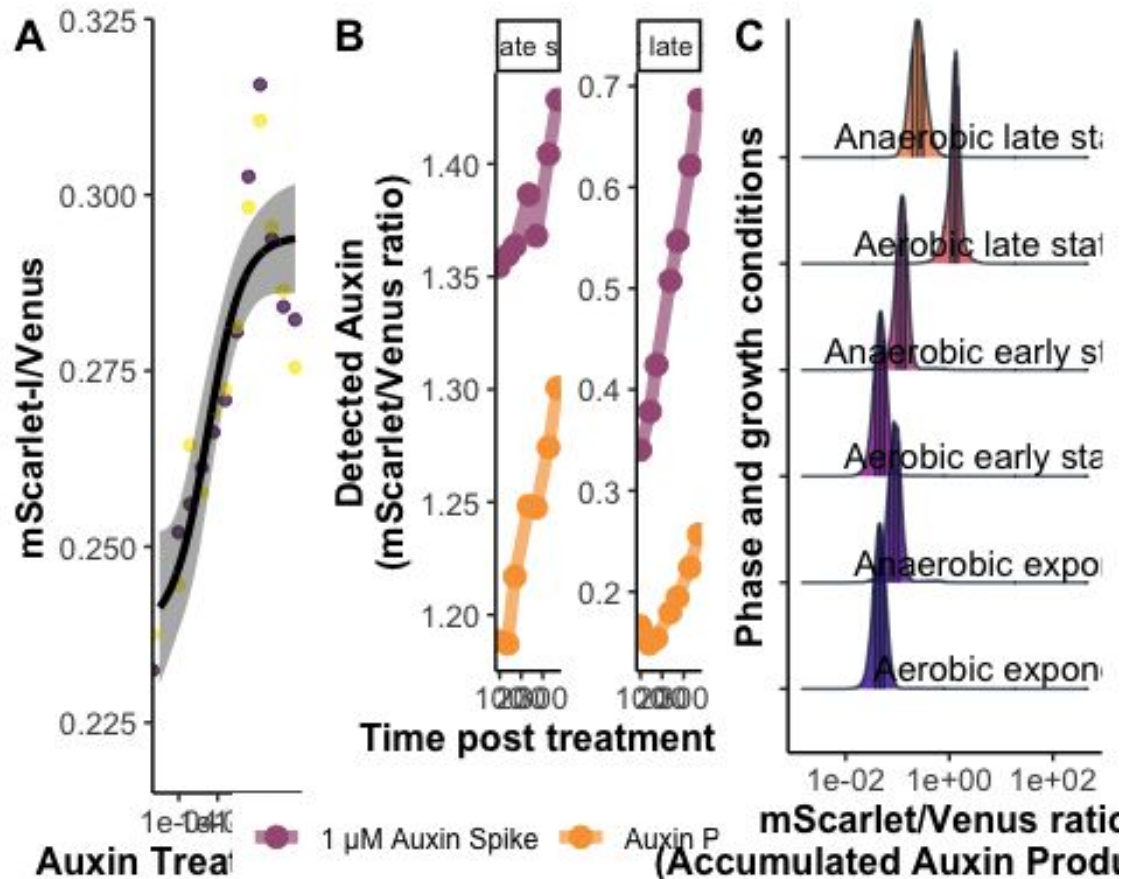

```
# ggsave('fig8new.png', width = 12, height = 4)
```

Supporting Figure S9: Cell growth and conditions during time-course assay

Supporting Figure S9A: At exponential phase

```
plate_05052023_IAAacc_sum <- summarizeFlow(plate_05052023_IAAacc, channel =
c("BL1.A",
  "YL1.A"), gated = TRUE)
## [1] "Summarizing all events..."

# plate_05052023_IAAacc_sum$treatment <-
# factor(plate_05052023_IAAacc_sum$treatment, levels = c('Control', '1 uM
# Auxin'))

# The time auxin addition is equal to time zero
time0 <- "4Pat-05052023-
IAAaccumulations_Expo4_IAAaccumulation_Aerobic_yWL209-Control.fcs"
# or whatever well was being read when auxin was added

plate_05052023_IAAacc_sum$time <- plate_05052023_IAAacc_sum$btime -
plate_05052023_IAAacc_sum[[which(plate_05052023_IAAacc_sum$name ==
time0), "btime"]]
```



# single bracket --> extracting the all name, 2 brackets extract just single  
 # 'value' or 'values'

```
growth_expo <- ggplot(subset(plate_05052023_IAAacc_sum, phase ==
"exponential"),
  aes(x = time, y = log(conc), group = treatment)) + geom_line(aes(color =
treatment),
  size = 2, alpha = 0.8) + geom_point(aes(color = treatment), size = 2,
alpha = 0.7) +
  scale_color_manual(values = c("#593d9cff", "#a65c85ff")) +
  geom_jitter(aes(color = treatment),
  position = position_jitterdodge(jitter.width = 0.1, dodge.width = 0.7),
size = 2) +
  facet_wrap(design_yeast ~ condition) + ylim(5.5, 8.5) + ylab("Log cell
density") +
  xlab("Time (min)") + theme_classic() + theme(legend.position = "none",
axis.title.y = element_text(size = 12,
  face = "bold"), axis.title.x = element_text(size = 12, face = "bold"),
axis.text = element_text(size = 8),
  legend.title = element_text(size = 10, face = "bold"), legend.text =
element_text(size = 8))
growth_expo
```

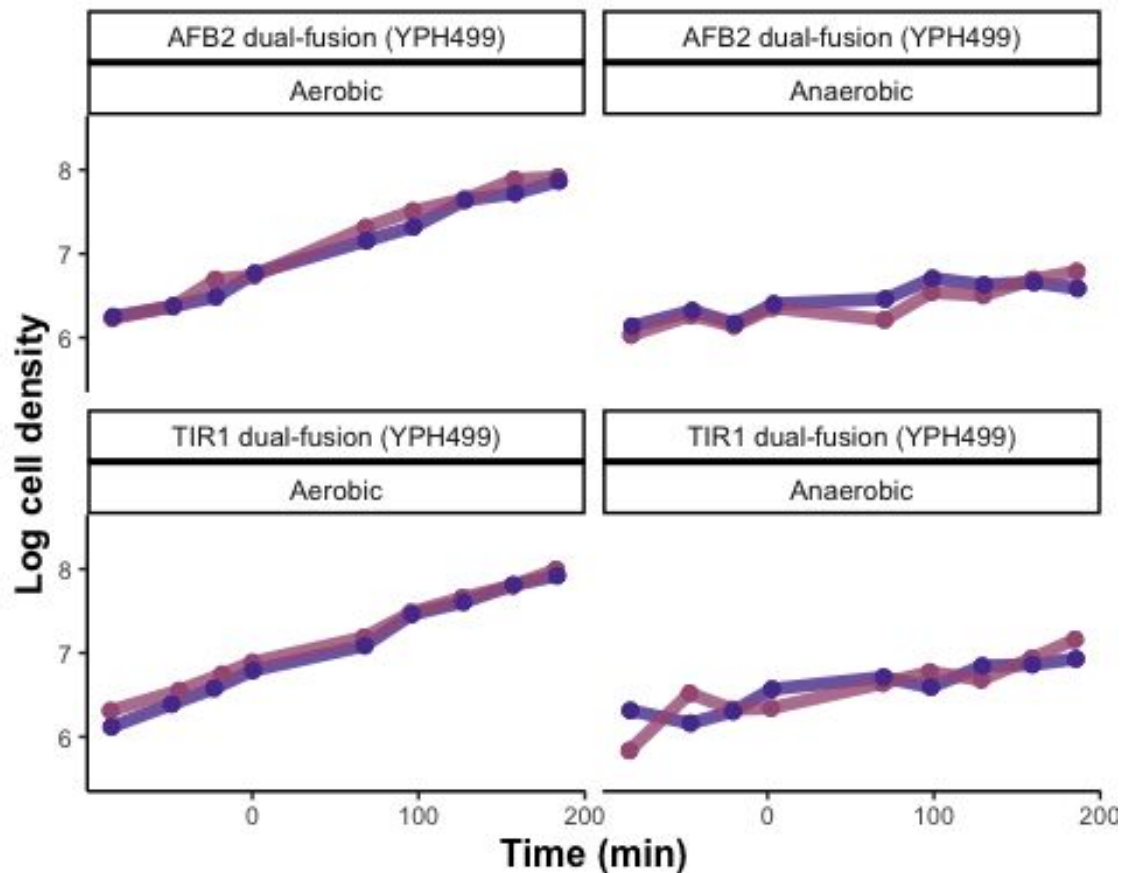

### Supporting Figure S9B: At stationary phase

```
growth_stat <- ggplot(subset(plate_05052023_IAAacc_sum, phase ==  
"stationary"), aes(x = time,  
y = log(conc), group = treatment)) + geom_line(aes(color = treatment),  
size = 2,  
alpha = 0.8) + geom_point(aes(color = treatment), size = 2, alpha = 0.7)  
+ scale_color_manual(values = c("#593d9cff",  
"#a65c85ff")) + geom_jitter(aes(color = treatment), position =  
position_jitterdodge(jitter.width = 0.1,  
dodge.width = 0.7), size = 2) + facet_wrap(design_yeast ~ condition) +  
ylim(5.5,  
8.5) + ylab("Log cell density") + xlab("Time (min)") + theme_classic() +  
theme(legend.position = "none",  
axis.title.y = element_text(size = 12, face = "bold"), axis.title.x =  
element_text(size = 12,  
face = "bold"), axis.text = element_text(size = 8), legend.title =  
element_text(size = 10,  
face = "bold"), legend.text = element_text(size = 8))  
growth_stat
```

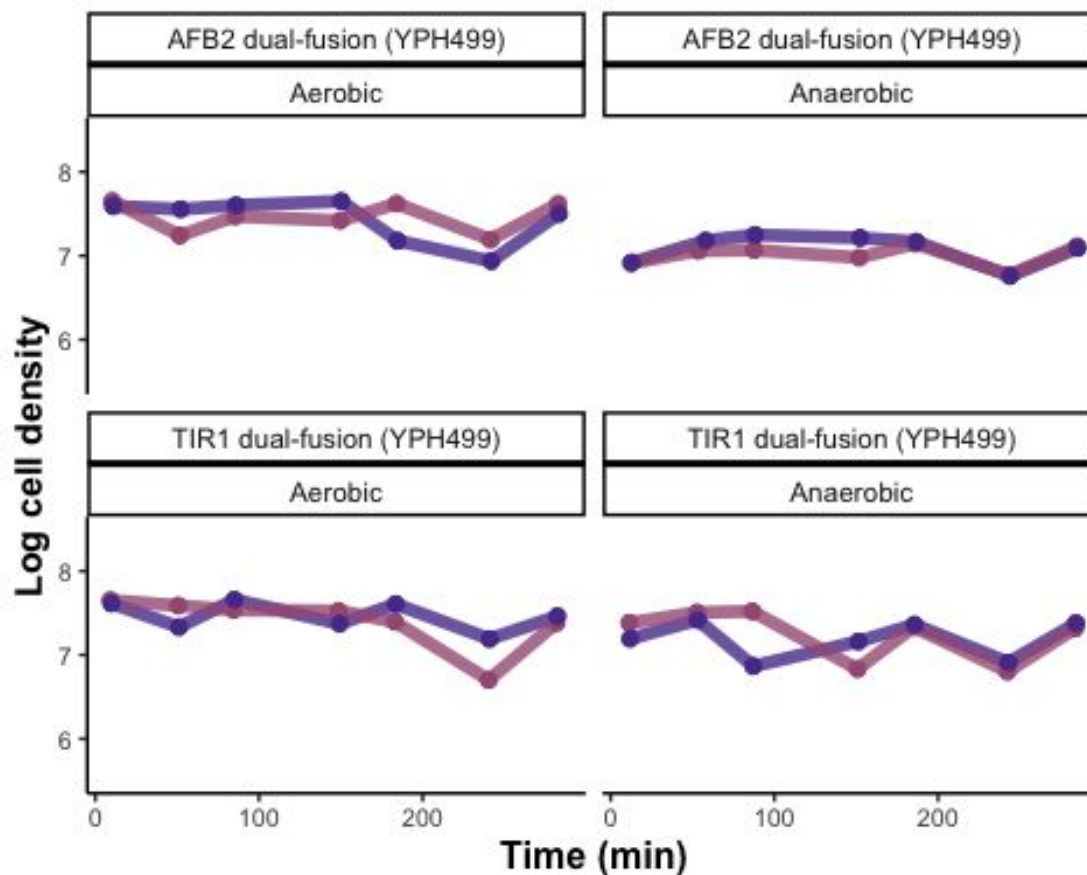

```
cellgrowth <- ggarrange(growth_expo, growth_stat, ncol = 2, nrow = 1, labels  
= c("A",
```

```

    "B"), common.legend = TRUE)
# cellgrowth

# ggsave('Supplement7.pdf', height = 5, width = 8)

```

#### Supporting Figure S8: AFB2 dual-fusion biosensor during dose-response assay

```

plate_08052022_aftertreat_SS <- read.plateSet(path = "Data for
publication/08052022_yWL210_DRA-LCMS-R2/after_treatment_SS/",
      pattern = "DRA*")

annotation <- createAnnotation(yourFlowSet = plate_08052022_aftertreat_SS)
write.csv(annotation, "Data for publication/08052022_yWL210_DRA-LCMS-
R2/08052022_aftertreat_SS_annotation.csv")

annotation <- read.csv("Data for publication/08052022_yWL210_DRA-LCMS-
R2/08052022_aftertreat_SS_annotation.csv")

aplate_08052022_aftertreat_SS <- annotateFlowSet(yourFlowSet =
plate_08052022_aftertreat_SS,
      annotation_df = annotation, mergeBy = "name")
head(rownames(pData(aplate_08052022_aftertreat_SS)))
# # [1] "1Pat-08052022-Biosensor_LCMS_rep2-DRA09_DRA-LCMS-R2_Exponential_0
uM.fcs"
# # [2] "1Pat-08052022-Biosensor_LCMS_rep2-DRA09_DRA-LCMS-
R2_Exponential_0.0064 uM.fcs"
# # [3] "1Pat-08052022-Biosensor_LCMS_rep2-DRA09_DRA-LCMS-
R2_Exponential_0.032 uM.fcs"
# # [4] "1Pat-08052022-Biosensor_LCMS_rep2-DRA09_DRA-LCMS-R2_Exponential_0.16
uM.fcs"
# # [5] "1Pat-08052022-Biosensor_LCMS_rep2-DRA09_DRA-LCMS-R2_Exponential_0.8
uM.fcs"
# # [6] "1Pat-08052022-Biosensor_LCMS_rep2-DRA09_DRA-LCMS-R2_Exponential_100
uM.fcs"
head(pData(aplate_08052022_aftertreat_SS))
# #
name
# # 1Pat-08052022-Biosensor_LCMS_rep2-DRA09_DRA-LCMS-R2_Exponential_0 uM.fcs
1Pat-08052022-Biosensor_LCMS_rep2-DRA09_DRA-LCMS-R2_Exponential_0 uM.fcs
# # 1Pat-08052022-Biosensor_LCMS_rep2-DRA09_DRA-LCMS-R2_Exponential_0.0064
uM.fcs 1Pat-08052022-Biosensor_LCMS_rep2-DRA09_DRA-LCMS-R2_Exponential_0.0064
uM.fcs
# # 1Pat-08052022-Biosensor_LCMS_rep2-DRA09_DRA-LCMS-R2_Exponential_0.032
uM.fcs 1Pat-08052022-Biosensor_LCMS_rep2-DRA09_DRA-LCMS-
R2_Exponential_0.032 uM.fcs
# # 1Pat-08052022-Biosensor_LCMS_rep2-DRA09_DRA-LCMS-R2_Exponential_0.16
uM.fcs 1Pat-08052022-Biosensor_LCMS_rep2-DRA09_DRA-LCMS-
R2_Exponential_0.16 uM.fcs
# # 1Pat-08052022-Biosensor_LCMS_rep2-DRA09_DRA-LCMS-R2_Exponential_0.8
uM.fcs 1Pat-08052022-Biosensor_LCMS_rep2-DRA09_DRA-LCMS-
R2_Exponential_0.8 uM.fcs

```

```

# # 1Pat-08052022-Biosensor_LCMS_rep2-DRA09_DRA-LCMS-R2_Exponential_100
uM.fcs      1Pat-08052022-Biosensor_LCMS_rep2-DRA09_DRA-LCMS-
R2_Exponential_100 uM.fcs
# #
folder
# # 1Pat-08052022-Biosensor_LCMS_rep2-DRA09_DRA-LCMS-R2_Exponential_0 uM.fcs
DRA09
# # 1Pat-08052022-Biosensor_LCMS_rep2-DRA09_DRA-LCMS-R2_Exponential_0.0064
uM.fcs  DRA09
# # 1Pat-08052022-Biosensor_LCMS_rep2-DRA09_DRA-LCMS-R2_Exponential_0.032
uM.fcs  DRA09
# # 1Pat-08052022-Biosensor_LCMS_rep2-DRA09_DRA-LCMS-R2_Exponential_0.16
uM.fcs  DRA09
# # 1Pat-08052022-Biosensor_LCMS_rep2-DRA09_DRA-LCMS-R2_Exponential_0.8
uM.fcs  DRA09
# # 1Pat-08052022-Biosensor_LCMS_rep2-DRA09_DRA-LCMS-R2_Exponential_100
uM.fcs  DRA09
# #
X
# # 1Pat-08052022-Biosensor_LCMS_rep2-DRA09_DRA-LCMS-R2_Exponential_0 uM.fcs
1
# # 1Pat-08052022-Biosensor_LCMS_rep2-DRA09_DRA-LCMS-R2_Exponential_0.0064
uM.fcs 2
# # 1Pat-08052022-Biosensor_LCMS_rep2-DRA09_DRA-LCMS-R2_Exponential_0.032
uM.fcs 3
# # 1Pat-08052022-Biosensor_LCMS_rep2-DRA09_DRA-LCMS-R2_Exponential_0.16
uM.fcs 4
# # 1Pat-08052022-Biosensor_LCMS_rep2-DRA09_DRA-LCMS-R2_Exponential_0.8
uM.fcs 5
# # 1Pat-08052022-Biosensor_LCMS_rep2-DRA09_DRA-LCMS-R2_Exponential_100
uM.fcs 6
# #
treatment
# # 1Pat-08052022-Biosensor_LCMS_rep2-DRA09_DRA-LCMS-R2_Exponential_0 uM.fcs
0 uM
# # 1Pat-08052022-Biosensor_LCMS_rep2-DRA09_DRA-LCMS-R2_Exponential_0.0064
uM.fcs 0.0064 uM
# # 1Pat-08052022-Biosensor_LCMS_rep2-DRA09_DRA-LCMS-R2_Exponential_0.032
uM.fcs 0.032 uM
# # 1Pat-08052022-Biosensor_LCMS_rep2-DRA09_DRA-LCMS-R2_Exponential_0.16
uM.fcs 0.16 uM
# # 1Pat-08052022-Biosensor_LCMS_rep2-DRA09_DRA-LCMS-R2_Exponential_0.8
uM.fcs 0.8 uM
# # 1Pat-08052022-Biosensor_LCMS_rep2-DRA09_DRA-LCMS-R2_Exponential_100
uM.fcs 100 uM
# #
reading
# # 1Pat-08052022-Biosensor_LCMS_rep2-DRA09_DRA-LCMS-R2_Exponential_0 uM.fcs
9
# # 1Pat-08052022-Biosensor_LCMS_rep2-DRA09_DRA-LCMS-R2_Exponential_0.0064

```

```

uM.fcs          9
# # 1Pat-08052022-Biosensor_LCMS_rep2-DRA09_DRA-LCMS-R2_Exponential_0.032
uM.fcs          9
# # 1Pat-08052022-Biosensor_LCMS_rep2-DRA09_DRA-LCMS-R2_Exponential_0.16
uM.fcs          9
# # 1Pat-08052022-Biosensor_LCMS_rep2-DRA09_DRA-LCMS-R2_Exponential_0.8
uM.fcs          9
# # 1Pat-08052022-Biosensor_LCMS_rep2-DRA09_DRA-LCMS-R2_Exponential_100
uM.fcs          9
# #
dose
# # 1Pat-08052022-Biosensor_LCMS_rep2-DRA09_DRA-LCMS-R2_Exponential_0 uM.fcs
0.0e+00
# # 1Pat-08052022-Biosensor_LCMS_rep2-DRA09_DRA-LCMS-R2_Exponential_0.0064
uM.fcs 6.4e-03
# # 1Pat-08052022-Biosensor_LCMS_rep2-DRA09_DRA-LCMS-R2_Exponential_0.032
uM.fcs 3.2e-02
# # 1Pat-08052022-Biosensor_LCMS_rep2-DRA09_DRA-LCMS-R2_Exponential_0.16
uM.fcs 1.6e-01
# # 1Pat-08052022-Biosensor_LCMS_rep2-DRA09_DRA-LCMS-R2_Exponential_0.8
uM.fcs 8.0e-01
# # 1Pat-08052022-Biosensor_LCMS_rep2-DRA09_DRA-LCMS-R2_Exponential_100
uM.fcs 1.0e+02
# #
collection
# # 1Pat-08052022-Biosensor_LCMS_rep2-DRA09_DRA-LCMS-R2_Exponential_0 uM.fcs
end
# # 1Pat-08052022-Biosensor_LCMS_rep2-DRA09_DRA-LCMS-R2_Exponential_0.0064
uM.fcs          end
# # 1Pat-08052022-Biosensor_LCMS_rep2-DRA09_DRA-LCMS-R2_Exponential_0.032
uM.fcs          end
# # 1Pat-08052022-Biosensor_LCMS_rep2-DRA09_DRA-LCMS-R2_Exponential_0.16
uM.fcs          end
# # 1Pat-08052022-Biosensor_LCMS_rep2-DRA09_DRA-LCMS-R2_Exponential_0.8
uM.fcs          end
# # 1Pat-08052022-Biosensor_LCMS_rep2-DRA09_DRA-LCMS-R2_Exponential_100
uM.fcs          end
# #
before_after
# # 1Pat-08052022-Biosensor_LCMS_rep2-DRA09_DRA-LCMS-R2_Exponential_0 uM.fcs
After
# # 1Pat-08052022-Biosensor_LCMS_rep2-DRA09_DRA-LCMS-R2_Exponential_0.0064
uM.fcs          After
# # 1Pat-08052022-Biosensor_LCMS_rep2-DRA09_DRA-LCMS-R2_Exponential_0.032
uM.fcs          After
# # 1Pat-08052022-Biosensor_LCMS_rep2-DRA09_DRA-LCMS-R2_Exponential_0.16
uM.fcs          After
# # 1Pat-08052022-Biosensor_LCMS_rep2-DRA09_DRA-LCMS-R2_Exponential_0.8
uM.fcs          After

```

```
# # 1Pat-08052022-Biosensor_LCMS_rep2-DRA09_DRA-LCMS-R2_Exponential_100
uM.fcs          After
```

### Supporting Figure S8A: Cell growth during dose-response assay

```
plate_08052022_sum <- summarizeFlow(aplate_08052022, channel = c("BL1.A",
"YL1.A"),
  gated = TRUE)
# # [1] "Summarizing all events..."

time0 <- "5Pat-08052022-Biosensor_LCMS_rep2-DRA05_DRA-LCMS-R2_Exponential_0
uM.fcs"

plate_08052022_sum$time <- plate_08052022_sum$btime -
plate_08052022_sum[[which(plate_08052022_sum$name ==
  time0), "btime"]]

growth <- subset(plate_08052022_sum, collection == "end") %>%
  mutate(treatment = fct_relevel(treatment, "0 uM", "0.0064 uM", "0.032
uM", "0.16 uM",
  "0.8 uM", "4 uM", "20 uM", "100 uM")) %>%
  ggplot(aes(x = time, y = conc, color = factor(treatment))) +
  geom_point(aes(color = treatment),
    size = 3, shape = 19) + scale_colour_viridis_d(option = "plasma", alpha =
0.7,
  begin = 0, end = 0.8) + geom_line(aes(color = treatment), size = 2, alpha
= 0.7) +
  guides(color = guide_legend(title = "Auxin\nTreatments")) + xlab("Time
post treatment (min)") +
  ylab("Cell concentration") + theme_classic() + theme(axis.title =
element_text(size = 12,
  face = "bold"), axis.text = element_text(size = 10), legend.title =
element_text(size = 10),
  legend.text = element_text(size = 11), legend.position = "right")

growth
```

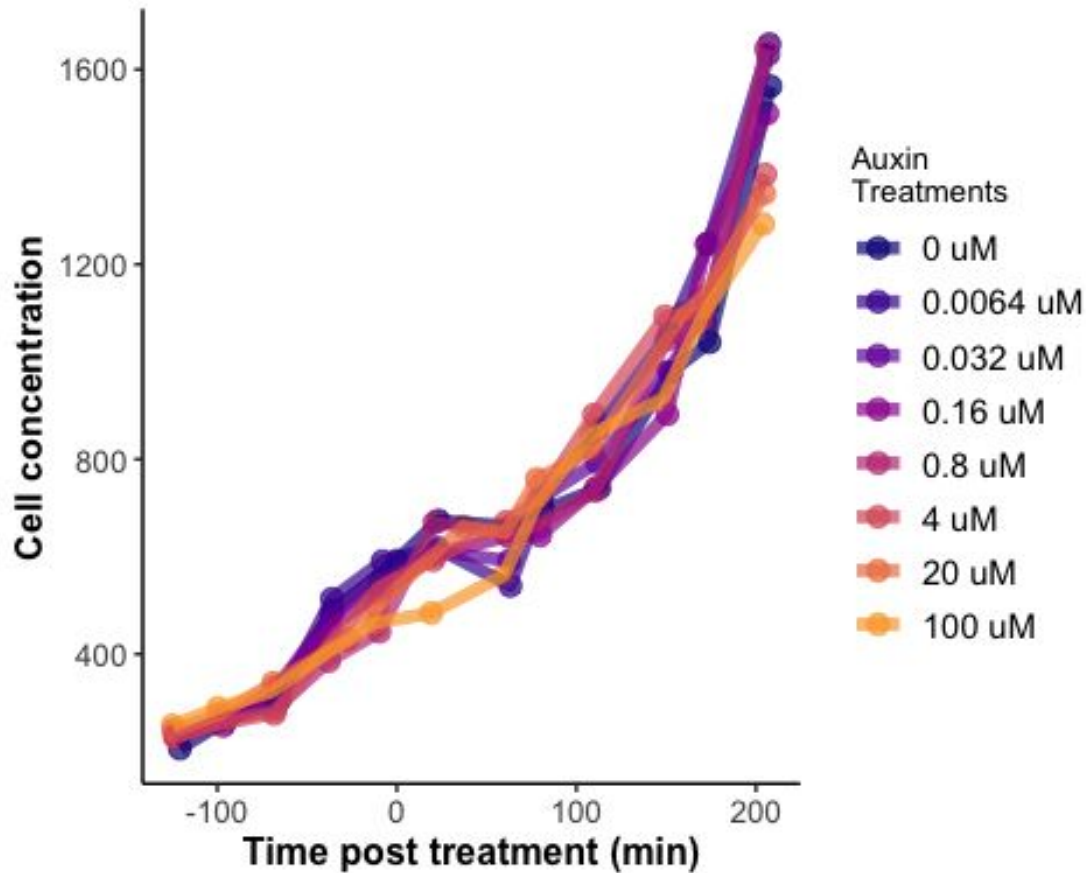

```
log_growth <- subset(plate_08052022_sum, collection == "end") %>%
  mutate(treatment = fct_relevel(treatment, "0 uM", "0.0064 uM", "0.032
uM", "0.16 uM",
    "0.8 uM", "4 uM", "20 uM", "100 uM")) %>%
  ggplot(aes(x = time, y = log(conc), color = factor(treatment))) +
geom_point(aes(color = treatment),
  size = 3, shape = 19) + geom_line(aes(color = treatment), size = 2, alpha
= 0.7) +
  guides(color = guide_legend(title = "Auxin\nTreatments")) +
scale_colour_viridis_d(option = "plasma",
  alpha = 0.7, begin = 0.4, end = 0.8) + xlab("Time post treatment (min)")
+ ylab("Log cell density (cells/ $\mu$ l)") +
  theme_classic() + theme(axis.title = element_text(size = 12, face =
"bold"),
  axis.text = element_text(size = 10), legend.title = element_text(size =
10),
  legend.text = element_text(size = 10), legend.position = "bottom")
log_growth
```

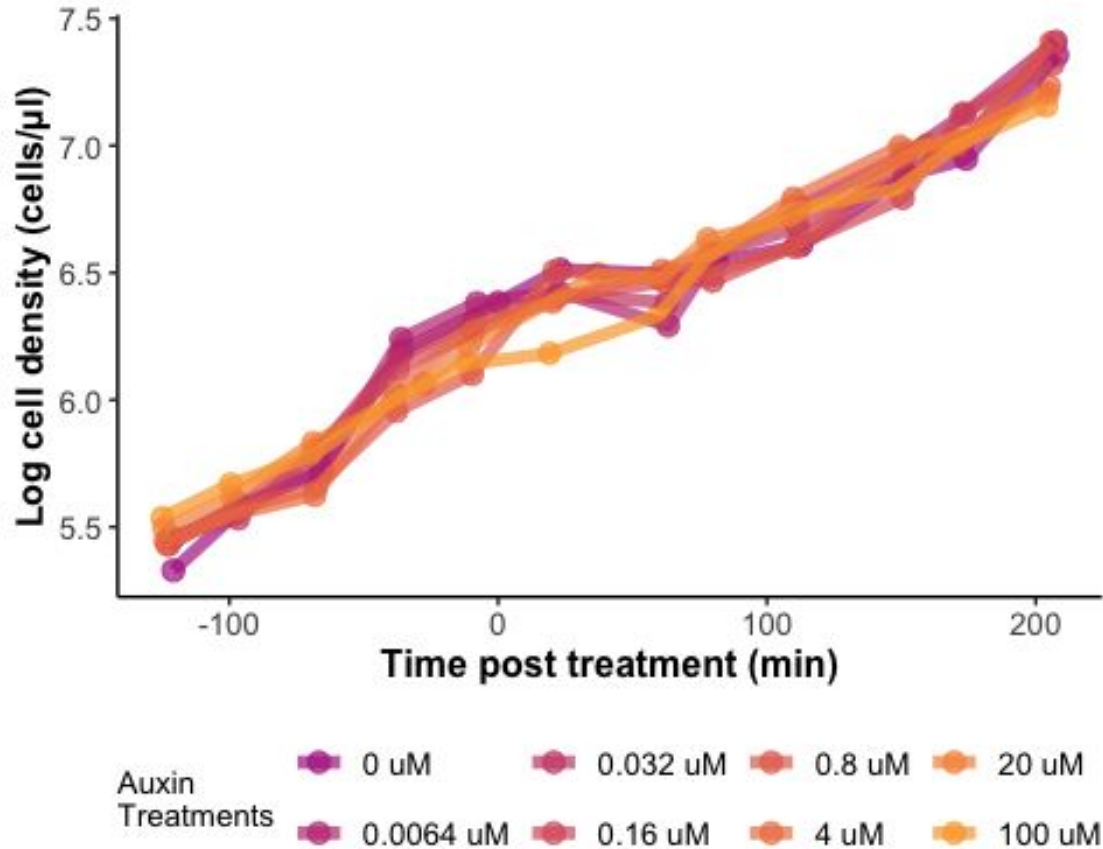

Supporting Figure S8B: Venus-IAA17/mScarlet-AFB2 ratio in response to different doses of auxin

```
ratio_line <- subset(plate_08052022_sum, collection == "end") %>%
  mutate(treatment = fct_relevel(treatment, "0 uM", "0.0064 uM", "0.032
uM", "0.16 uM",
  "0.8 uM", "4 uM", "20 uM", "100 uM")) %>%
  ggplot(aes(x = time, y = YL1.Amean/BL1.Amean, color = factor(treatment)))
+ geom_point(aes(color = treatment),
  size = 3, shape = 19) + scale_colour_viridis_d(option = "plasma", alpha =
0.7,
  begin = 0.4, end = 0.8) + geom_line(aes(color = treatment), size = 2,
alpha = 0.7) +
  guides(color = guide_legend(title = "Auxin\nTreatments")) + xlab("Time
post treatment (min)") +
  ylab("Venus/mScarlet-I ratio") + theme_classic() + theme(axis.title =
element_text(size = 12,
  face = "bold"), axis.text = element_text(size = 10), legend.title =
element_text(size = 10),
  legend.text = element_text(size = 11), legend.position = "bottom") +
ylab("Venus/mScarlet-I") +
  xlab("Time post treatment (min)") + stat_compare_means(label =
```



```
"p.signif", method = "anova",
  ref.group = "0 uM")
```

```
ratio_line
```

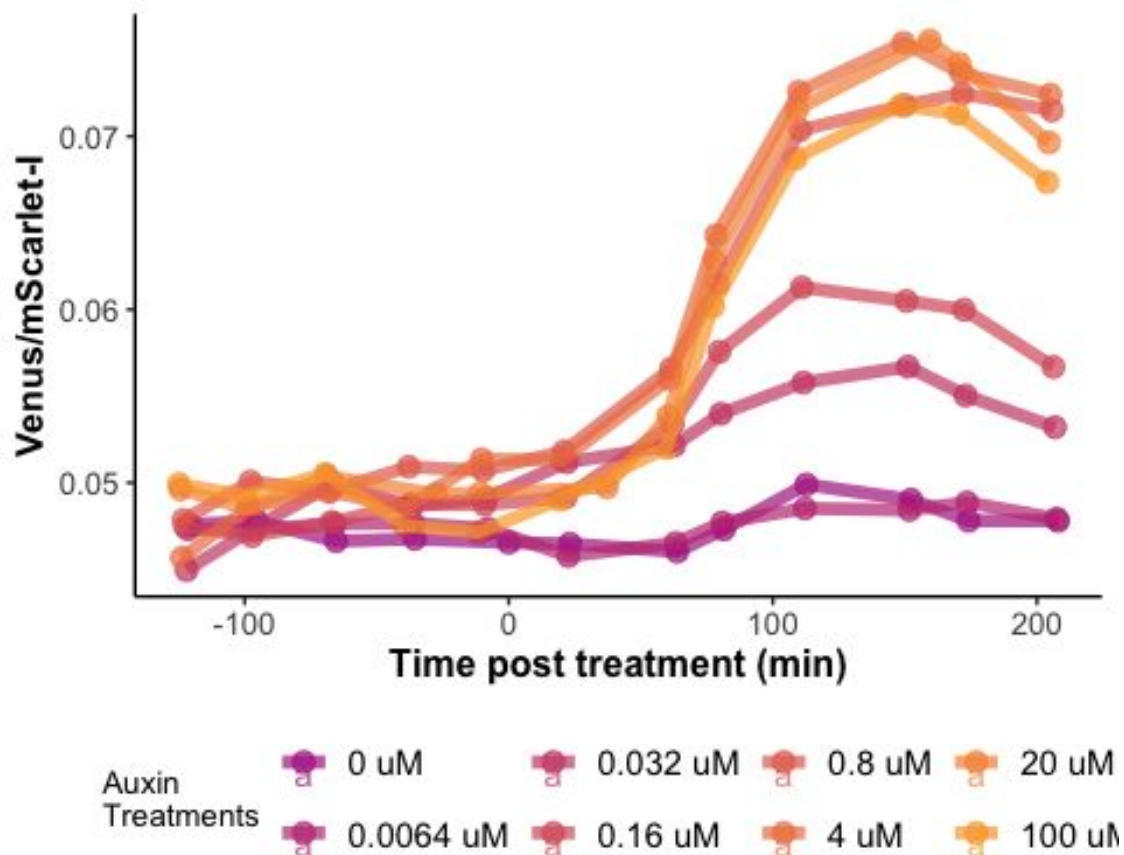

```
levels(plate_08052022_sum$treatment)
# # NULL
plate_08052022_sum$treatment <- factor(plate_08052022_sum$treatment, levels =
  c("0 uM",
    "0.0064 uM", "0.032 uM", "0.16 uM", "0.8 uM", "4 uM", "20 uM", "100 uM"))
```

**Supplement 6B: The bar plot of the foldchange between different doses of auxin treatment and solvent control**

```
DRA_different <- plate_08052022_sum %>%
  dplyr::filter(reading %in% c("10", "11", "12")) %>%
  dplyr::filter(collection == "end") %>%
  mutate(Ratio_DRA = YL1.Amean/BL1.Amean)
```

```
# Create a variable to keep track of whether to subtract or not
```

```

subtract_flag <- FALSE
x <- 0

# Iterate through each row
for (i in 1:nrow(DRA_different)) {
  if (DRA_different$treatment[i] == "0 uM") {
    subtract_flag <- TRUE
    x <- DRA_different$Ratio_DRA[i]
    DRA_different$Ratio_DRA[i] <- 0
  } else if (subtract_flag) {
    DRA_different$Ratio_DRA[i] <- DRA_different$Ratio_DRA[i] - x
  }
}

print(DRA_different)
### A tibble: 24 × 20
#   name          time btime atime[,1] events[,1] conc[,1] folder      X
#   <chr>         <dbl> <dbl>    <dbl>    <int>    <dbl> <chr> <int>
#   <fct>
# 1 10Pat-08052... 152.  905.    0.292    29348    978. DRA10  109 0
#   uM
# 2 10Pat-08052... 152.  904.    0.292    31776   1059. DRA10  110
#   0.0064 uM
# 3 10Pat-08052... 151.  903.    0.294    29377    979. DRA10  111
#   0.032 uM
# 4 10Pat-08052... 151.  903.    0.293    26773    892. DRA10  112
#   0.16 uM
# 5 10Pat-08052... 150.  902.    0.292    31354   1045. DRA10  113
#   0.8 uM
# 6 10Pat-08052... 148.  901.    0.294    27722    924. DRA10  114
#   100 uM
# 7 10Pat-08052... 159.  912.    0.294    32989   1100. DRA10  115 20
#   uM
# 8 10Pat-08052... 149.  902.    0.292    32800   1093. DRA10  116 4
#   uM
# 9 11Pat-08052... 174.  926.    0.294    31209   1040. DRA11  121 0
#   uM
# 10 11Pat-08052... 174.  926.    0.292    37309   1244. DRA11  122
#   0.0064 uM
### i 14 more rows
### i 11 more variables: reading <int>, dose <dbl>, collection <chr>,
### before_after <chr>, BL1.Amean <dbl>, BL1.Amedian <dbl>, BL1.Asd
<dbl>,
### YL1.Amean <dbl>, YL1.Amedian <dbl>, YL1.Asd <dbl>, Ratio_DRA <dbl>

# my_comparisons <- list(c('0 uM', '0.0064 uM'),c('0 uM', '0.032 uM'),c('0
# uM',
# '0.16 uM'),c('0 uM', '0.8 uM') ,c('0 uM', '4 uM'), c('0 uM', '20 uM'), c('0
# uM', '100 uM'))

```

```

fc_DRA <- ggplot(DRA_different, aes(x = treatment, y = Ratio_DRA, fill =
treatment,
  colour = treatment)) + geom_boxplot(alpha = 0.5) +
scale_fill_viridis_d(name = "dose",
  option = "plasma", begin = 0.4, end = 0.8, alpha = 0.5) +
scale_color_viridis_d(name = "dose",
  option = "plasma", begin = 0.1, end = 0.8) + theme_classic() +
theme(axis.title.y = element_text(size = 12,
  face = "bold"), axis.title.x = element_text(size = 12, face = "bold"),
axis.text = element_text(size = 10),
  legend.title = element_text(size = 11, face = "bold"), legend.text =
element_text(size = 8),
  legend.position = "none") + ylab("mScarlet-I/Venus") + xlab("Dose of
auxin ( $\mu\text{M}$ )") +
  stat_compare_means(label = "p.signif", method = "t.test", ref.group = "0
uM",
    label.y = 0.003, size = 5) + scale_x_discrete(labels = c(`0 uM` =
"0", `0.0064 uM` = "0.0064",
  `0.032 uM` = "0.032", `0.16 uM` = "0.16", `0.8 uM` = "0.8", `4 uM` = "4",
  `20 uM` = "20",
  `100 uM` = "100"))

```

fc\_DRA

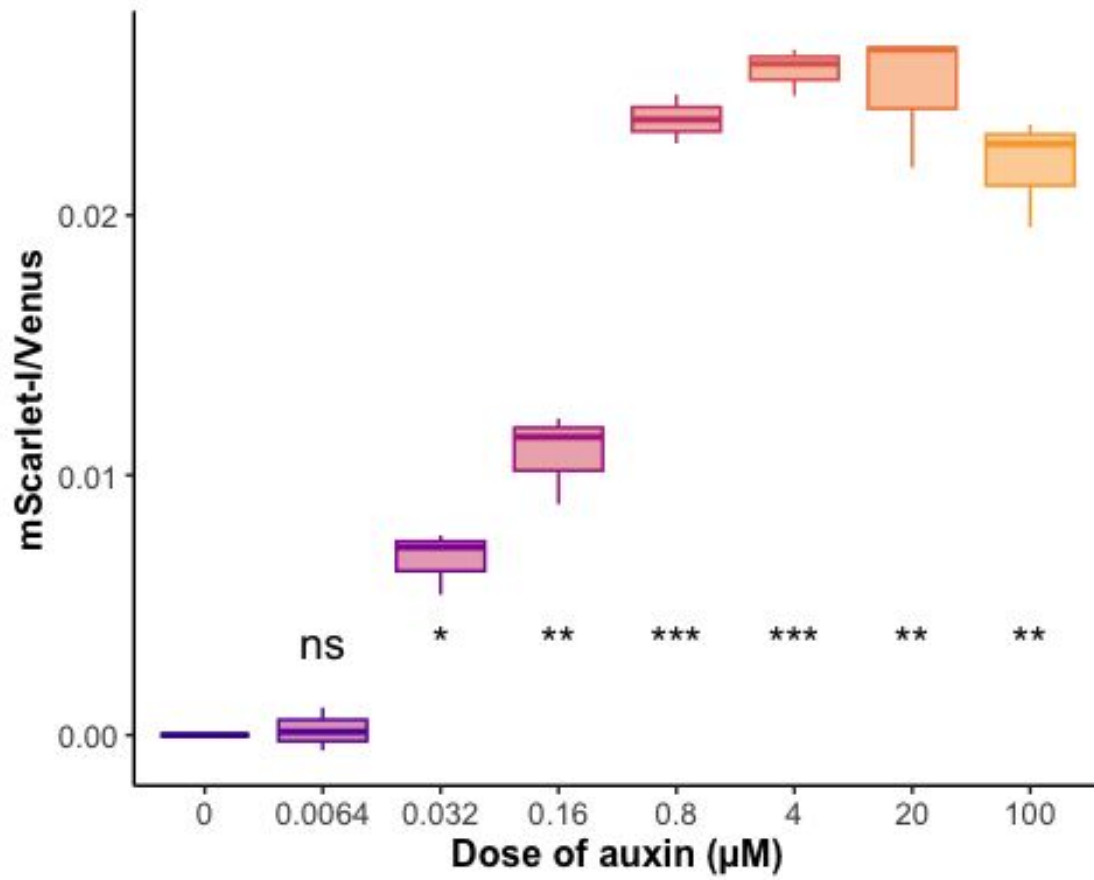

```
Sup6_ABC <- ggarrange(log_growth, ratio_line, fc_DRA, ncol = 3, nrow = 1,
  labels = c("A",
    "B", "C"), common.legend = TRUE, widths = c(0.5, 0.5, 1))
```

Sup6\_ABC

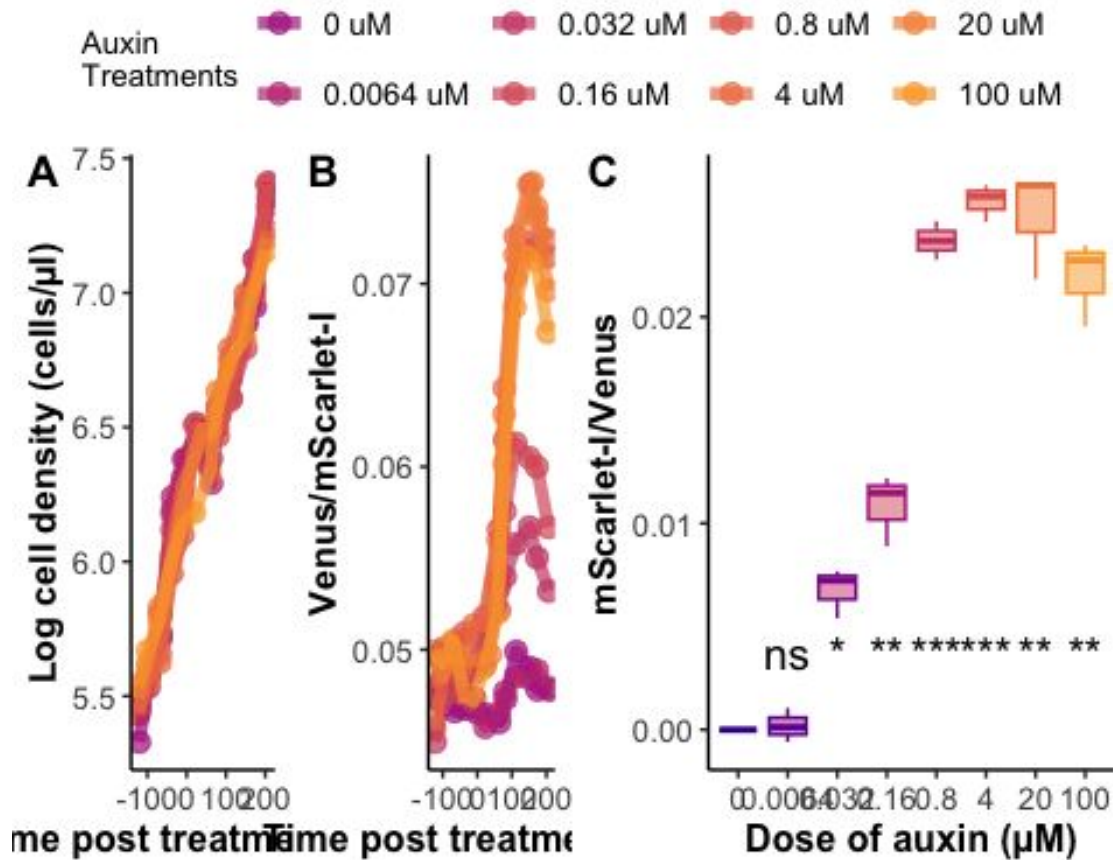

```
# ggsave('Supplement6_new.pdf',width = 12, height = 4)
```

### Supporting Figure S6: The reversibility of the dual-fusion AFB2 biosensor

```
plate_05292021_TCA_washed <- read.plateSet(path = "Data for
publication/05292024-Biosensor_Reversible_TCA/All data/Washed/",
pattern = "TCA*")

annotation <- createAnnotation(yourFlowSet = plate_05292021_TCA_washed)
write.csv(annotation, "Data for publication/05292024-
Biosensor_Reversible_TCA/05292024_TCA_washed_annotation.csv")

annotation <- read.csv("Data for publication/05292024-
Biosensor_Reversible_TCA/05292024_TCA_washed_annotation.csv")
aplate_05292021_TCA_washed <- annotateFlowSet(yourFlowSet =
plate_05292021_TCA_washed,
annotation_df = annotation, mergeBy = "name")
head(rownames(pData(aplate_05292021_TCA_washed)))
## [1] "1Pat-04292024-Biosensor_Reversibility-
TCA09_Experiment_yWL209_Orginial 50 uM Auxin.fcs"
## [2] "1Pat-04292024-Biosensor_Reversibility-
TCA09_Experiment_yWL209_Orginial Control.fcs"
## [3] "1Pat-04292024-Biosensor_Reversibility-
```

```

TCA09_Experiment_yWL209_Washed-Control-50uM Auxin.fcs"
# # [4] "1Pat-04292024-Biosensor_Reversibility-
TCA09_Experiment_yWL209_Washed-Control-Control.fcs"
# # [5] "1Pat-04292024-Biosensor_Reversibility-
TCA09_Experiment_yWL209_Washed-Original 50 uM Auxin-50uM Auxin.fcs"
# # [6] "1Pat-04292024-Biosensor_Reversibility-
TCA09_Experiment_yWL209_Washed-Original 50 uM Auxin-Control.fcs"
head(pData(aplate_05292021_TCA_washed))
# #
name
# # 1Pat-04292024-Biosensor_Reversibility-TCA09_Experiment_yWL209_Original 50
uM Auxin.fcs 1Pat-04292024-
Biosensor_Reversibility-TCA09_Experiment_yWL209_Original 50 uM Auxin.fcs
# # 1Pat-04292024-Biosensor_Reversibility-TCA09_Experiment_yWL209_Original
Control.fcs 1Pat-04292024-
Biosensor_Reversibility-TCA09_Experiment_yWL209_Original Control.fcs
# # 1Pat-04292024-Biosensor_Reversibility-TCA09_Experiment_yWL209_Washed-
Control-50uM Auxin.fcs 1Pat-04292024-
Biosensor_Reversibility-TCA09_Experiment_yWL209_Washed-Control-50uM Auxin.fcs
# # 1Pat-04292024-Biosensor_Reversibility-TCA09_Experiment_yWL209_Washed-
Control-Control.fcs 1Pat-04292024-
Biosensor_Reversibility-TCA09_Experiment_yWL209_Washed-Control-Control.fcs
# # 1Pat-04292024-Biosensor_Reversibility-TCA09_Experiment_yWL209_Washed-
Original 50 uM Auxin-50uM Auxin.fcs 1Pat-04292024-Biosensor_Reversibility-
TCA09_Experiment_yWL209_Washed-Original 50 uM Auxin-50uM Auxin.fcs
# # 1Pat-04292024-Biosensor_Reversibility-TCA09_Experiment_yWL209_Washed-
Original 50 uM Auxin-Control.fcs 1Pat-04292024-Biosensor_Reversibility-
TCA09_Experiment_yWL209_Washed-Original 50 uM Auxin-Control.fcs
# #
folder
# # 1Pat-04292024-Biosensor_Reversibility-TCA09_Experiment_yWL209_Original 50
uM Auxin.fcs TCA09
# # 1Pat-04292024-Biosensor_Reversibility-TCA09_Experiment_yWL209_Original
Control.fcs TCA09
# # 1Pat-04292024-Biosensor_Reversibility-TCA09_Experiment_yWL209_Washed-
Control-50uM Auxin.fcs TCA09
# # 1Pat-04292024-Biosensor_Reversibility-TCA09_Experiment_yWL209_Washed-
Control-Control.fcs TCA09
# # 1Pat-04292024-Biosensor_Reversibility-TCA09_Experiment_yWL209_Washed-
Original 50 uM Auxin-50uM Auxin.fcs TCA09
# # 1Pat-04292024-Biosensor_Reversibility-TCA09_Experiment_yWL209_Washed-
Original 50 uM Auxin-Control.fcs TCA09
# #
X
# # 1Pat-04292024-Biosensor_Reversibility-TCA09_Experiment_yWL209_Original 50
uM Auxin.fcs 1
# # 1Pat-04292024-Biosensor_Reversibility-TCA09_Experiment_yWL209_Original
Control.fcs 2
# # 1Pat-04292024-Biosensor_Reversibility-TCA09_Experiment_yWL209_Washed-
Control-50uM Auxin.fcs 3

```

```

# # 1Pat-04292024-Biosensor_Reversibility-TCA09_Experiment_yWL209_Washed-
Control-Control.fcs 4
# # 1Pat-04292024-Biosensor_Reversibility-TCA09_Experiment_yWL209_Washed-
Orginial 50 uM Auxin-50uM Auxin.fcs 5
# # 1Pat-04292024-Biosensor_Reversibility-TCA09_Experiment_yWL209_Washed-
Orginial 50 uM Auxin-Control.fcs 6
# #
treatment
# # 1Pat-04292024-Biosensor_Reversibility-TCA09_Experiment_yWL209_Orginial 50
uM Auxin.fcs 50 uM Auxin
# # 1Pat-04292024-Biosensor_Reversibility-TCA09_Experiment_yWL209_Orginial
Control.fcs Control
# # 1Pat-04292024-Biosensor_Reversibility-TCA09_Experiment_yWL209_Washed-
Control-50uM Auxin.fcs Control
# # 1Pat-04292024-Biosensor_Reversibility-TCA09_Experiment_yWL209_Washed-
Control-Control.fcs Control
# # 1Pat-04292024-Biosensor_Reversibility-TCA09_Experiment_yWL209_Washed-
Orginial 50 uM Auxin-50uM Auxin.fcs 50 uM Auxin
# # 1Pat-04292024-Biosensor_Reversibility-TCA09_Experiment_yWL209_Washed-
Orginial 50 uM Auxin-Control.fcs 50 uM Auxin
# #
strain
# # 1Pat-04292024-Biosensor_Reversibility-TCA09_Experiment_yWL209_Orginial 50
uM Auxin.fcs yWL209
# # 1Pat-04292024-Biosensor_Reversibility-TCA09_Experiment_yWL209_Orginial
Control.fcs yWL209
# # 1Pat-04292024-Biosensor_Reversibility-TCA09_Experiment_yWL209_Washed-
Control-50uM Auxin.fcs yWL209
# # 1Pat-04292024-Biosensor_Reversibility-TCA09_Experiment_yWL209_Washed-
Control-Control.fcs yWL209
# # 1Pat-04292024-Biosensor_Reversibility-TCA09_Experiment_yWL209_Washed-
Orginial 50 uM Auxin-50uM Auxin.fcs yWL209
# # 1Pat-04292024-Biosensor_Reversibility-TCA09_Experiment_yWL209_Washed-
Orginial 50 uM Auxin-Control.fcs yWL209
# #
reading
# # 1Pat-04292024-Biosensor_Reversibility-TCA09_Experiment_yWL209_Orginial 50
uM Auxin.fcs 9
# # 1Pat-04292024-Biosensor_Reversibility-TCA09_Experiment_yWL209_Orginial
Control.fcs 9
# # 1Pat-04292024-Biosensor_Reversibility-TCA09_Experiment_yWL209_Washed-
Control-50uM Auxin.fcs 9
# # 1Pat-04292024-Biosensor_Reversibility-TCA09_Experiment_yWL209_Washed-
Control-Control.fcs 9
# # 1Pat-04292024-Biosensor_Reversibility-TCA09_Experiment_yWL209_Washed-
Orginial 50 uM Auxin-50uM Auxin.fcs 9
# # 1Pat-04292024-Biosensor_Reversibility-TCA09_Experiment_yWL209_Washed-
Orginial 50 uM Auxin-Control.fcs 9
# #
before_after

```

```

# # 1Pat-04292024-Biosensor_Reversibility-TCA09_Experiment_yWL209_Orginial 50
uM Auxin.fcs before
# # 1Pat-04292024-Biosensor_Reversibility-TCA09_Experiment_yWL209_Orginial
Control.fcs before
# # 1Pat-04292024-Biosensor_Reversibility-TCA09_Experiment_yWL209_Washed-
Control-50uM Auxin.fcs before
# # 1Pat-04292024-Biosensor_Reversibility-TCA09_Experiment_yWL209_Washed-
Control-Control.fcs before
# # 1Pat-04292024-Biosensor_Reversibility-TCA09_Experiment_yWL209_Washed-
Orginial 50 uM Auxin-50uM Auxin.fcs before
# # 1Pat-04292024-Biosensor_Reversibility-TCA09_Experiment_yWL209_Washed-
Orginial 50 uM Auxin-Control.fcs before
# #
sample
# # 1Pat-04292024-Biosensor_Reversibility-TCA09_Experiment_yWL209_Orginial 50
uM Auxin.fcs 209-Original-Auxin
# # 1Pat-04292024-Biosensor_Reversibility-TCA09_Experiment_yWL209_Orginial
Control.fcs 209-Original-Control
# # 1Pat-04292024-Biosensor_Reversibility-TCA09_Experiment_yWL209_Washed-
Control-50uM Auxin.fcs 209-Washed-Control-Auxin
# # 1Pat-04292024-Biosensor_Reversibility-TCA09_Experiment_yWL209_Washed-
Control-Control.fcs 209-Washed-Control-Control
# # 1Pat-04292024-Biosensor_Reversibility-TCA09_Experiment_yWL209_Washed-
Orginial 50 uM Auxin-50uM Auxin.fcs 209-Washed-Auxin-Auxin
# # 1Pat-04292024-Biosensor_Reversibility-TCA09_Experiment_yWL209_Washed-
Orginial 50 uM Auxin-Control.fcs 209-Washed-Auxin-Control

plate_05292021_TCA_washed_sum <- summarizeFlow(aplate_05292021_TCA_washed,
channel = c("BL1.A",
"YL1.A"), gated = TRUE)
# # [1] "Summarizing all events..."

time0_washed <- "2Pat-04292024-Biosensor_Reversibility-
TCA10_Experiment_yWL209_Orginial 50 uM Auxin.fcs"
# or whatever well was being read when auxin was added

plate_05292021_TCA_washed_sum$time <- plate_05292021_TCA_washed_sum$btime -
plate_05292021_TCA_washed_sum[[which(plate_05292021_TCA_washed_sum$name ==
time0_washed), "btime"]]

plate_05292021_TCA_washed_sum <- plate_05292021_TCA_washed_sum %>%
mutate(ratio_TCA_washed = BL1.Amean/YL1.Amean) %>%
mutate(normalizedratio_ratio_TCA_washed =
ratio_TCA_washed/mean(ratio_TCA_washed))

plate_05292021_TCA_washed_sum <- summarizeFlow(aplate_05292021_TCA_washed,

```



```

channel = c("BL1.A",
            "YL1.A"), gated = TRUE)
# # [1] "Summarizing all events..."

time0_washed <- "2Pat-04292024-Biosensor_Reversibility-
TCA10_Experiment_yWL209_Original 50 uM Auxin.fcs"
# or whatever well was being read when auxin was added

plate_05292021_TCA_washed_sum$time <- plate_05292021_TCA_washed_sum$btime -
plate_05292021_TCA_washed_sum[[which(plate_05292021_TCA_washed_sum$name ==
time0_washed), "btime"]]

plate_05292021_TCA_washed_sum <- plate_05292021_TCA_washed_sum %>%
  mutate(ratio_TCA_washed = BL1.Amean/YL1.Amean) %>%
  mutate(normalizedratio_ratio_TCA_washed =
ratio_TCA_washed/mean(ratio_TCA_washed))

afterwash_210 <- ggplot(subset(plate_05292021_TCA_washed_sum, strain ==
"yWL210" &
  reading %in% c("9", "10", "11", "12", "13", "14")), aes(x = time, y =
BL1.Amean/YL1.Amean,
  color = sample)) + geom_line(aes(color = sample), alpha = 0.7, size = 2)
+ geom_point(aes(color = sample),
  size = 3) + theme_classic() + ylim(7, 24) + theme(axis.title =
element_text(size = 12,
  face = "bold"), axis.text = element_text(size = 10), legend.title =
element_text(size = 10),
  legend.text = element_text(size = 10), legend.position = "none") +
xlab("Time post treatment (mins)") +
  ylab("VENUS/mScarlet") + scale_fill_manual(values = c("#cc6a70ff",
"#13306dff",
  "#f9b641ff", "#f68f46ff", "#6b4596ff", "#042333ff")) +
scale_color_manual(values = c("#cc6a70ff",
  "#13306dff", "#f9b641ff", "#f68f46ff", "#6b4596ff", "#042333ff"))
afterwash_210

```

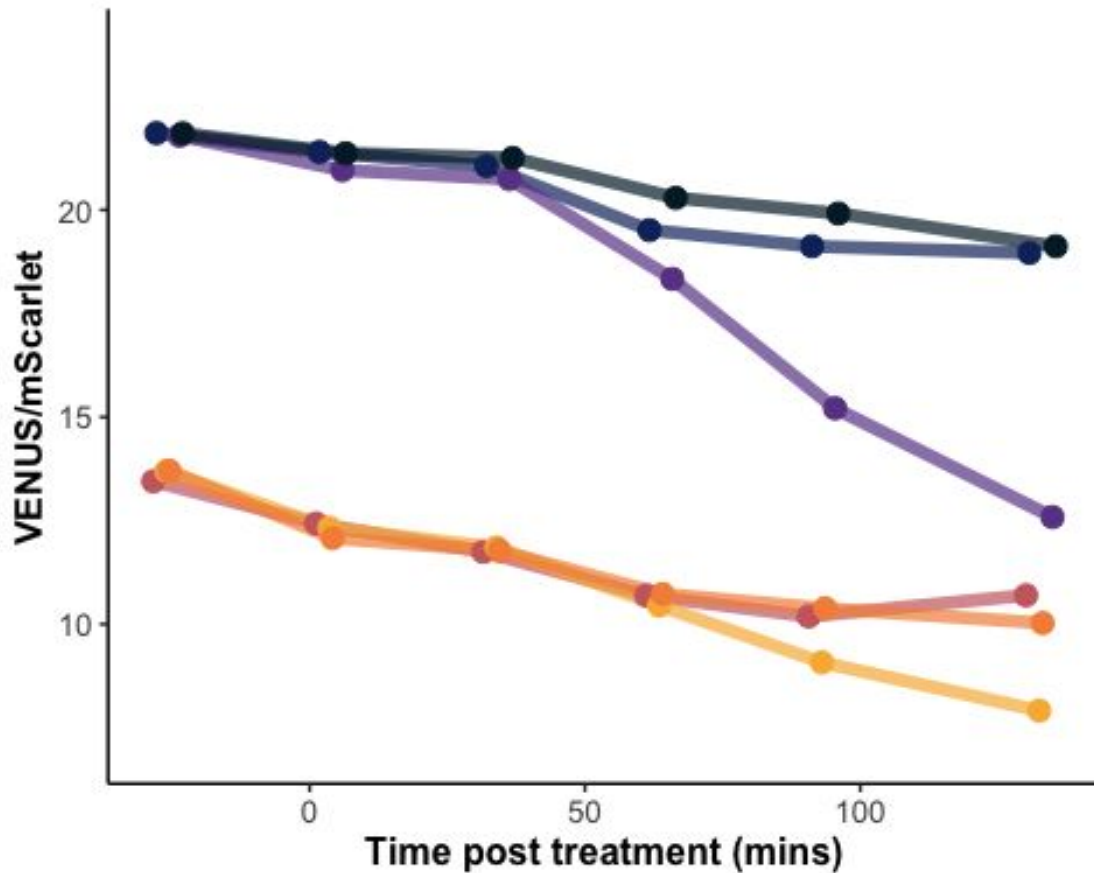

```

plot_washonly_210 <- plate_05292021_TCA_washed_sum %>%
  dplyr::filter(sample %in% c("210-Washed-Control-Auxin", "210-Washed-
Control-Control",
  "210-Washed-Auxin-Auxin", "210-Washed-Auxin-Control"))

washed_ratio <- plot_washonly_210 %>%
  dplyr::filter(reading %in% c("15", "16", "17")) %>%
  mutate(sample = case_when(sample == "210-Washed-Control-Auxin" ~ "Washed
Control treated, \nAuxin spike",
  sample == "210-Washed-Control-Control" ~ "Washed Control treated,
\nControl spike",
  sample == "210-Washed-Auxin-Auxin" ~ "Washed Auxin treated, \nAuxin
spike",
  sample == "210-Washed-Auxin-Control" ~ "Washed Auxin treated,
\nControl spike")) %>%
  ggplot(aes(x = sample, y = BL1.Amean/YL1.Amean, color = sample)) +
  geom_point(aes(color = sample),
  alpha = 1, size = 3) + scale_color_manual(values = c("#f9b641ff",
"#f68f46ff",

```

```

"#6b4596ff", "#042333ff")) + theme_classic() + ylab("Venus/mScarlet
Ratio") +
  xlab("") + theme(legend.position = "none") + stat_summary(fun.data =
mean_se,
  mult = 1, geom = "pointrange", color = "black")
washed_ratio

```

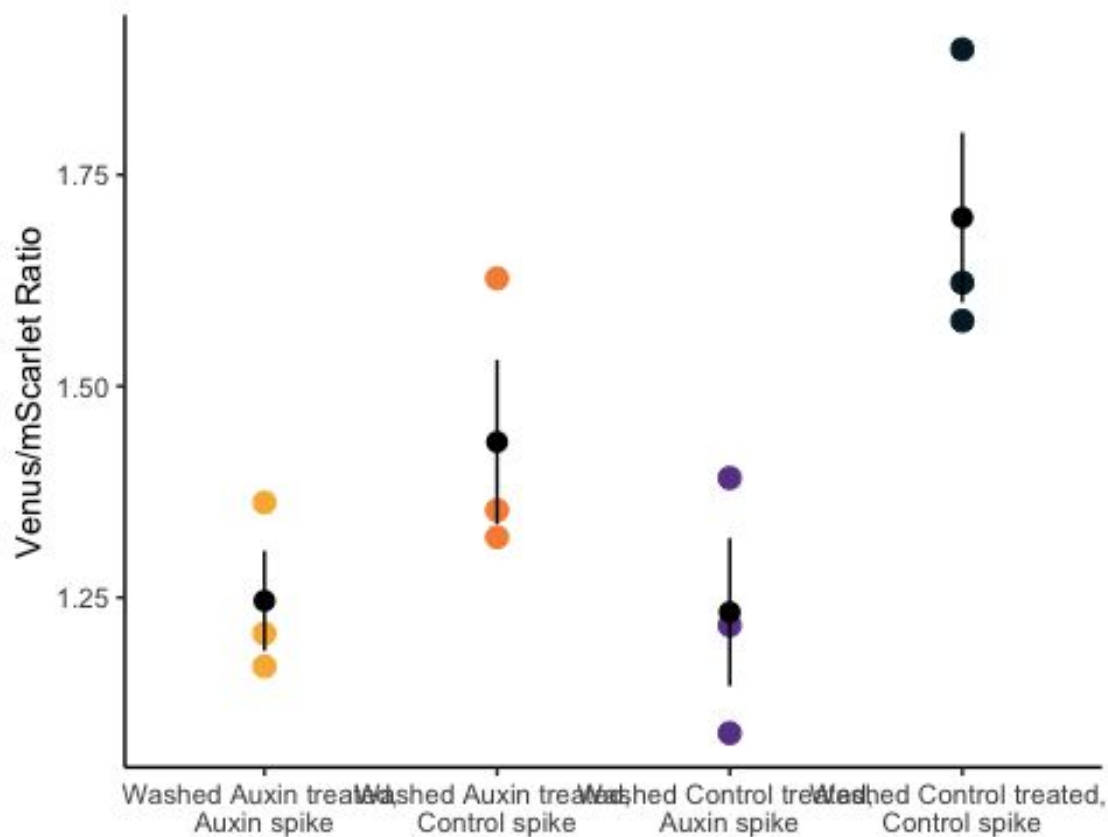

```

washed_Venus <- plot_washonly_210 %>%
  dplyr::filter(reading %in% c("15", "16", "17")) %>%
  mutate(sample = case_when(sample == "210-Washed-Control-Auxin" ~ "Washed
Control treated, \nAuxin spike",
  sample == "210-Washed-Control-Control" ~ "Washed Control treated,
\nControl spike",
  sample == "210-Washed-Auxin-Auxin" ~ "Washed Auxin treated, \nAuxin
spike",
  sample == "210-Washed-Auxin-Control" ~ "Washed Auxin treated,
\nControl spike")) %>%
  ggplot(aes(x = sample, y = BL1.Amean, color = sample)) + geom_point(alpha
= 1,
  size = 3) + scale_color_manual(values = c("#f9b641ff", "#f68f46ff",
"#6b4596ff",

```

```

"#042333ff")) + theme_classic() + ylab("Venus") + xlab("") +
theme(legend.position = "none") +
  stat_summary(fun.data = mean_se, mult = 1, geom = "pointrange", color =
"black")
washed_Venus

```

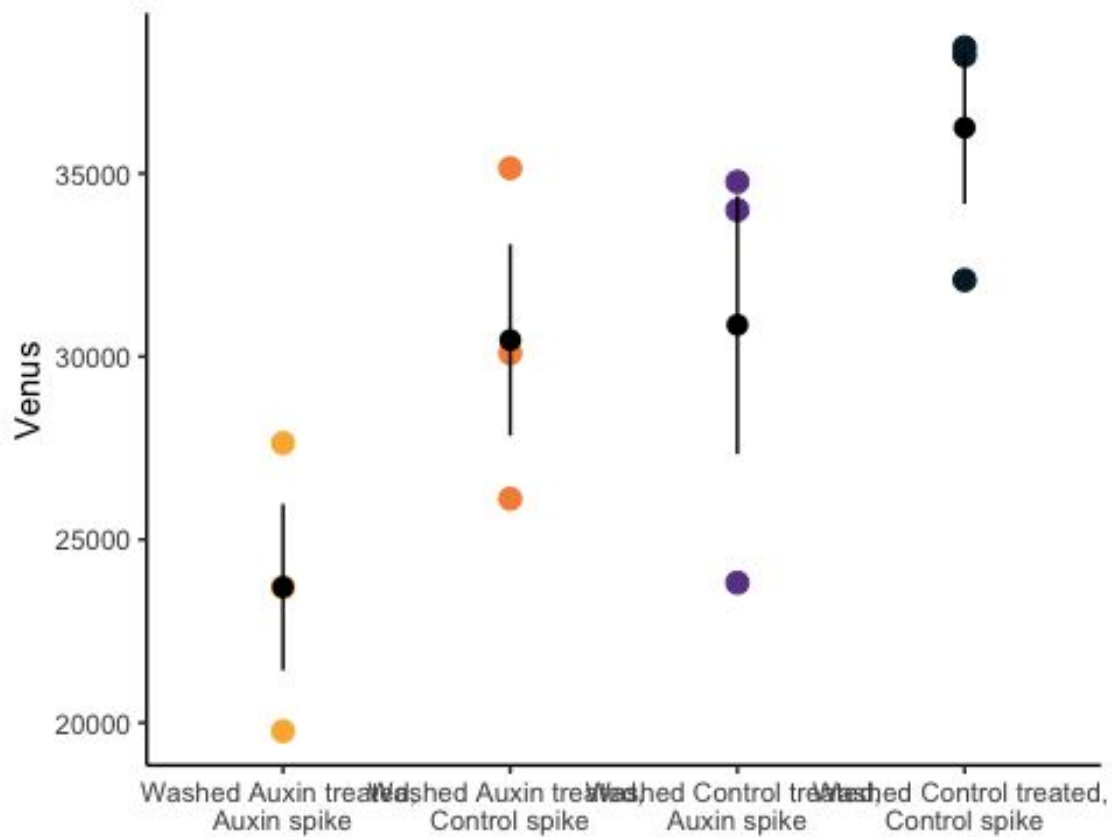

```

fig_ratio_Venus <- ggarrange(washed_ratio, washed_Venus, ncol = 1, nrow = 2,
labels = c("A",
"B"))
fig_ratio_Venus

```

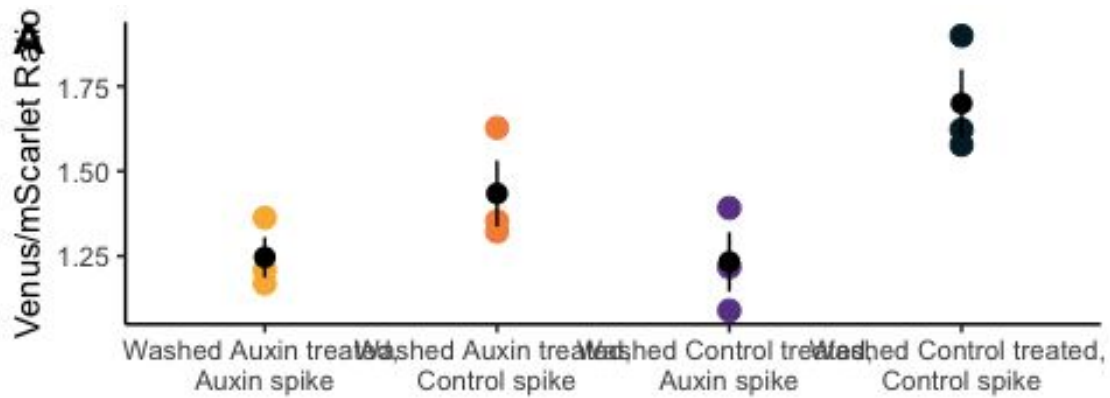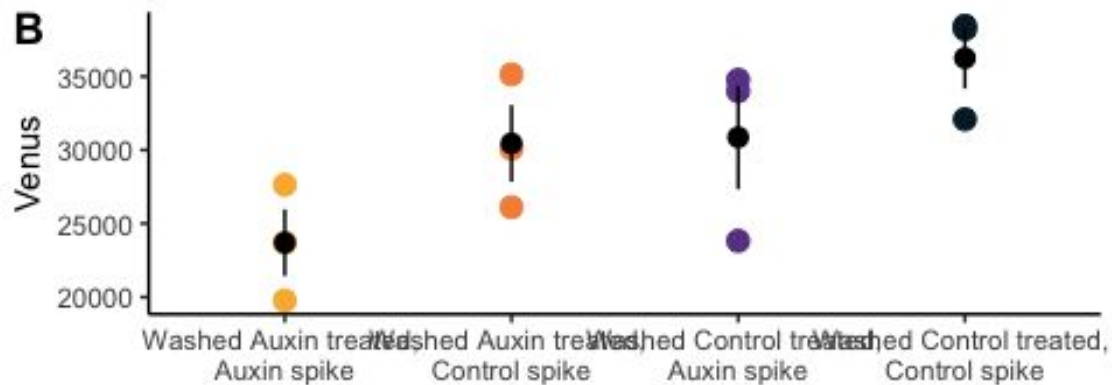

```
# ggsave('fig_ratio_Venus.png', height = 5, width = 7)
```

### Session Info and Packages/Libraries

```
##r
sessionInfo()
## R version 4.3.2 (2023-10-31)
## Platform: aarch64-apple-darwin20 (64-bit)
## Running under: macOS Sonoma 14.5
##
## Matrix products: default
## BLAS: /Library/Frameworks/R.framework/Versions/4.3-arm64/Resources/lib/libRblas.0.dylib
## LAPACK: /Library/Frameworks/R.framework/Versions/4.3-arm64/Resources/lib/libRlapack.dylib; LAPACK version 3.11.0
##
## locale:
```

```

## [1] en_US.UTF-8/en_US.UTF-8/en_US.UTF-8/C/en_US.UTF-8/en_US.UTF-8
##
## time zone: America/New_York
## tzcode source: internal
##
## attached base packages:
## [1] stats      graphics  grDevices  utils      datasets  methods   base
##
## other attached packages:
## [1] flowClust_3.40.0      ggcyto_1.30.2          flowWorkspace_4.14.3
## [4] ncdfflow_2.48.0       BH_1.84.0-0           openCyto_2.14.0
## [7] flowTime_1.26.0      flowCore_2.14.2       flextable_0.9.6
## [10] ggsignif_0.6.4        multcompView_0.1-10   ggstance_0.3.7
## [13] ggpubr_0.6.0          patchwork_1.2.0       wesanderson_0.3.7
## [16] gridExtra_2.3         drc_3.0-1             MASS_7.3-60.0.1
## [19] ggribes_0.5.6         lubridate_1.9.3       forcats_1.0.0
## [22] stringr_1.5.1         dplyr_1.1.4           purrr_1.0.2
## [25] readr_2.1.5           tidyr_1.3.1           tibble_3.2.1
## [28] ggplot2_3.5.1        tidyverse_2.0.0
##
## loaded via a namespace (and not attached):
## [1] RColorBrewer_1.1-3    rstudioapi_0.15.0     jsonlite_1.8.8
## [4] magrittr_2.0.3        TH.data_1.1-2         farver_2.1.1
## [7] rmarkdown_2.26       zlibbioc_1.48.2       ragg_1.2.7
## [10] vctrs_0.6.5          askpass_1.2.0         rstatix_0.7.2
## [13] htmltools_0.5.8.1    plotrix_3.8-4         curl_5.2.1
## [16] broom_1.0.5          plyr_1.8.9            sandwich_3.1-0
## [19] zoo_1.8-12           uuid_1.2-0            mime_0.12
## [22] lifecycle_1.0.4      pkgconfig_2.0.3       Matrix_1.6-5
## [25] R6_2.5.1             fastmap_1.1.1         shiny_1.8.1.1
## [28] digest_0.6.34        colorspace_2.1-0      S4Vectors_0.40.2
## [31] textshaping_0.3.7    labeling_0.4.3        cytolib_2.14.1
## [34] fansi_1.0.6          timechange_0.3.0     abind_1.4-5
## [37] compiler_4.3.2       bit64_4.0.5          fontquiver_0.2.1
## [40] withr_3.0.0          backports_1.4.1      carData_3.0-5
## [43] highr_0.10           hexbin_1.28.3        openssl_2.1.1
## [46] gfonts_0.2.0         gtools_3.9.5         tools_4.3.2
## [49] zip_2.3.1            httpuv_1.6.15        glue_1.7.0
## [52] promises_1.3.0       grid_4.3.2           generics_0.1.3
## [55] gtable_0.3.4         tzdb_0.4.0           data.table_1.15.2
## [58] hms_1.1.3           xml2_1.3.6           car_3.1-2
## [61] utf8_1.2.4          BiocGenerics_0.48.1  pillar_1.9.0
## [64] vroom_1.6.5         later_1.3.2          splines_4.3.2
## [67] lattice_0.22-5      bit_4.0.5            survival_3.5-8
## [70] RProtoBufLib_2.14.1  tidyselect_1.2.0     RBGL_1.78.0
## [73] fontLiberation_0.1.0 knitr_1.45
fontBitstreamVera_0.1.1
## [76] crul_1.4.2           stats4_4.3.2         xfun_0.42
## [79] Biobase_2.62.0      matrixStats_1.3.0    stringi_1.8.3
## [82] yaml_2.3.8          evaluate_0.23        codetools_0.2-19

```

```
# # [85] httpcode_0.3.0      officer_0.6.6      gdtools_0.3.7
# # [88] Rgraphviz_2.46.0    graph_1.80.0      cli_3.6.2
# # [91] xtable_1.8-4        systemfonts_1.0.6  munsell_0.5.0
# # [94] Rcpp_1.0.12         XML_3.99-0.16.1   parallel_4.3.2
# # [97] ggeasy_0.1.4        viridisLite_0.4.2 mvtnorm_1.2-5
# # [100] scales_1.3.0        crayon_1.5.2      rlang_1.1.3
# # [103] cowplot_1.1.3       multcomp_1.4-25   formatR_1.14
```
